# Supplementary material for: Signal Transduction Protein Array Analysis Links LRRK2 to Ste20 Kinases and PKC Zeta That Modulate Neuronal Plasticity
Source: PLoS One. 2010 Oct 7;5(10):e13191. doi: 10.1371/journal.pone.0013191 (PMC2951910; doi:10.1371/journal.pone.0013191)
Supplement: Table S2 — Genepix Pro and ProtoArray Prospector analysis of protein arrays used for protein-protein binding studies. (1.15 MB XLS) [file pone.0013191.s003.xls]

## Sheet: Array_Interaction
ATF	1.0
Type=GenePix Results 2
Settings=Easy Quant
GalFile=D:\Signal Transduction Array.gal
Creator=ScanArray Express, Microarray Analysis System 3.0.3.2
Block	Column	Row	Name	ID	X	Y	Dia.	F1 Median	F1 Mean	F1 SD	B1 Median	B1 Mean	B1 SD	% > B1+1SD	% > B1+2SD	F1 % Sat.	F2 Median	F2 Mean	F2 SD	B2 Median	B2 Mean	B2 SD	% > B2+1SD	% > B2+2SD	F2 % Sat.	F3 Median	F3 Mean	F3 SD	B3 Median	B3 Mean	B3 SD	% > B3+1SD	% > B3+2SD	F3 % Sat.	F4 Median	F4 Mean	F4 SD	B4 Median	B4 Mean	B4 SD	% > B4+1SD	% > B4+2SD	F4 % Sat.	Ratio of Medians (Ratio/1)	Ratio of Means (Ratio/1)	Median of Ratios (Ratio/1)	Mean of Ratios (Ratio/1)	Ratios SD (Ratio/1)	Rgn Ratio (Ratio/1)
1	1	1	Cy5/Cy3 labeled biotin-BSA marker proteins	n/a	2607	7562	400	11822	12449	1466	11308	11354	668	50	33	0	0	0	0	0	0	0	0	0	0	0	0	0	0	0	0	0	0	0	0	0	0	0	0	0	0	0	0	0.000	0.000	0.000	0.000	0.000	0.000
1	2	1	Cy5/Cy3 labeled biotin-BSA marker proteins	n/a	3204	7562	400	12080	12747	2455	11566	11794	1035	30	24	0	0	0	0	0	0	0	0	0	0	0	0	0	0	0	0	0	0	0	0	0	0	0	0	0	0	0	0	0.000	0.000	0.000	0.000	0.000	0.000
1	3	1	empty	empty	3802	7562	400	12080	13159	3601	10794	10980	1029	51	26	0	0	0	0	0	0	0	0	0	0	0	0	0	0	0	0	0	0	0	0	0	0	0	0	0	0	0	0	0.000	0.000	0.000	0.000	0.000	0.000
1	4	1	empty	empty	4399	7562	400	11052	11060	1086	11308	11396	603	20	10	0	0	0	0	0	0	0	0	0	0	0	0	0	0	0	0	0	0	0	0	0	0	0	0	0	0	0	0	0.000	0.000	0.000	0.000	0.000	0.000
1	5	1	empty	empty	4997	7562	400	11566	11678	1171	11052	11170	982	39	15	0	0	0	0	0	0	0	0	0	0	0	0	0	0	0	0	0	0	0	0	0	0	0	0	0	0	0	0	0.000	0.000	0.000	0.000	0.000	0.000
1	6	1	empty	empty	5594	7562	400	10538	10588	538	11052	11111	577	2	1	0	0	0	0	0	0	0	0	0	0	0	0	0	0	0	0	0	0	0	0	0	0	0	0	0	0	0	0	0.000	0.000	0.000	0.000	0.000	0.000
1	1	2	spleen tyrosine kinase	P000047	2607	8316	400	13622	13542	694	11308	11571	953	95	73	0	0	0	0	0	0	0	0	0	0	0	0	0	0	0	0	0	0	0	0	0	0	0	0	0	0	0	0	0.000	0.000	0.000	0.000	0.000	0.000
1	2	2	spleen tyrosine kinase	P000047	3204	8316	400	13622	13944	1977	11308	11287	782	80	62	0	0	0	0	0	0	0	0	0	0	0	0	0	0	0	0	0	0	0	0	0	0	0	0	0	0	0	0	0.000	0.000	0.000	0.000	0.000	0.000
1	3	2	spleen tyrosine kinase	P000047	3802	8316	400	14136	14226	1383	11566	11726	1175	91	51	0	0	0	0	0	0	0	0	0	0	0	0	0	0	0	0	0	0	0	0	0	0	0	0	0	0	0	0	0.000	0.000	0.000	0.000	0.000	0.000
1	4	2	spleen tyrosine kinase	P000047	4399	8316	400	13622	13730	1186	11308	11700	1122	88	51	0	0	0	0	0	0	0	0	0	0	0	0	0	0	0	0	0	0	0	0	0	0	0	0	0	0	0	0	0.000	0.000	0.000	0.000	0.000	0.000
1	5	2	cAMP responsive element binding protein 1; transcript variant B	P000158	4997	8316	400	12336	12644	1543	11308	11363	704	60	36	0	0	0	0	0	0	0	0	0	0	0	0	0	0	0	0	0	0	0	0	0	0	0	0	0	0	0	0	0.000	0.000	0.000	0.000	0.000	0.000
1	6	2	cAMP responsive element binding protein 1; transcript variant B	P000158	5594	8316	400	12850	14610	4136	10794	10829	497	92	81	0	0	0	0	0	0	0	0	0	0	0	0	0	0	0	0	0	0	0	0	0	0	0	0	0	0	0	0	0.000	0.000	0.000	0.000	0.000	0.000
1	1	3	cAMP responsive element binding protein 1; transcript variant B	P000158	2607	9069	400	12594	12602	809	11822	11800	938	45	7	0	0	0	0	0	0	0	0	0	0	0	0	0	0	0	0	0	0	0	0	0	0	0	0	0	0	0	0	0.000	0.000	0.000	0.000	0.000	0.000
1	2	3	cAMP responsive element binding protein 1; transcript variant B	P000158	3204	9069	400	13108	12955	815	11566	12023	1889	28	0	0	0	0	0	0	0	0	0	0	0	0	0	0	0	0	0	0	0	0	0	0	0	0	0	0	0	0	0	0.000	0.000	0.000	0.000	0.000	0.000
1	3	3	protein phosphatase 2; regulatory subunit B (B56); alpha isoform	P000333	3802	9069	400	13622	13292	1029	11308	11249	1145	78	51	0	0	0	0	0	0	0	0	0	0	0	0	0	0	0	0	0	0	0	0	0	0	0	0	0	0	0	0	0.000	0.000	0.000	0.000	0.000	0.000
1	4	3	protein phosphatase 2; regulatory subunit B (B56); alpha isoform	P000333	4399	9069	400	13364	13484	1079	10794	11070	974	99	72	0	0	0	0	0	0	0	0	0	0	0	0	0	0	0	0	0	0	0	0	0	0	0	0	0	0	0	0	0.000	0.000	0.000	0.000	0.000	0.000
1	5	3	protein phosphatase 2; regulatory subunit B (B56); alpha isoform	P000333	4997	9069	400	12594	12886	1755	10794	10813	620	81	68	0	0	0	0	0	0	0	0	0	0	0	0	0	0	0	0	0	0	0	0	0	0	0	0	0	0	0	0	0.000	0.000	0.000	0.000	0.000	0.000
1	6	3	protein phosphatase 2; regulatory subunit B (B56); alpha isoform	P000333	5594	9069	400	12336	13071	2423	11052	11053	692	76	50	0	0	0	0	0	0	0	0	0	0	0	0	0	0	0	0	0	0	0	0	0	0	0	0	0	0	0	0	0.000	0.000	0.000	0.000	0.000	0.000
1	1	4	nuclear factor of kappa light polypeptide gene enhancer in B-cells inhibitor	P000435	2607	9823	400	13364	13456	1196	11308	11192	567	90	81	0	0	0	0	0	0	0	0	0	0	0	0	0	0	0	0	0	0	0	0	0	0	0	0	0	0	0	0	0.000	0.000	0.000	0.000	0.000	0.000
1	2	4	nuclear factor of kappa light polypeptide gene enhancer in B-cells inhibitor	P000435	3204	9823	400	13622	13869	1598	11308	11435	752	89	77	0	0	0	0	0	0	0	0	0	0	0	0	0	0	0	0	0	0	0	0	0	0	0	0	0	0	0	0	0.000	0.000	0.000	0.000	0.000	0.000
1	3	4	nuclear factor of kappa light polypeptide gene enhancer in B-cells inhibitor	P000435	3802	9823	400	12850	12784	853	11308	11271	599	83	64	0	0	0	0	0	0	0	0	0	0	0	0	0	0	0	0	0	0	0	0	0	0	0	0	0	0	0	0	0.000	0.000	0.000	0.000	0.000	0.000
1	4	4	nuclear factor of kappa light polypeptide gene enhancer in B-cells inhibitor	P000435	4399	9823	400	13108	12791	1242	11308	11440	757	76	63	0	0	0	0	0	0	0	0	0	0	0	0	0	0	0	0	0	0	0	0	0	0	0	0	0	0	0	0	0.000	0.000	0.000	0.000	0.000	0.000
1	5	4	eukaryotic translation initiation factor 4E	P000535	4997	9823	400	12850	12873	1448	11052	11173	1006	78	46	0	0	0	0	0	0	0	0	0	0	0	0	0	0	0	0	0	0	0	0	0	0	0	0	0	0	0	0	0.000	0.000	0.000	0.000	0.000	0.000
1	6	4	eukaryotic translation initiation factor 4E	P000535	5594	9823	400	12850	12774	1020	11308	11317	754	79	57	0	0	0	0	0	0	0	0	0	0	0	0	0	0	0	0	0	0	0	0	0	0	0	0	0	0	0	0	0.000	0.000	0.000	0.000	0.000	0.000
1	1	5	eukaryotic translation initiation factor 4E	P000535	2607	10576	400	13108	13574	1870	11308	11421	823	79	55	0	0	0	0	0	0	0	0	0	0	0	0	0	0	0	0	0	0	0	0	0	0	0	0	0	0	0	0	0.000	0.000	0.000	0.000	0.000	0.000
1	2	5	eukaryotic translation initiation factor 4E	P000535	3204	10576	400	14906	14650	1693	11822	11661	762	89	76	0	0	0	0	0	0	0	0	0	0	0	0	0	0	0	0	0	0	0	0	0	0	0	0	0	0	0	0	0.000	0.000	0.000	0.000	0.000	0.000
1	3	5	Buffer	n/a	3802	10576	400	11308	11439	897	11566	11495	796	19	1	0	0	0	0	0	0	0	0	0	0	0	0	0	0	0	0	0	0	0	0	0	0	0	0	0	0	0	0	0.000	0.000	0.000	0.000	0.000	0.000
1	4	5	Buffer	n/a	4399	10576	400	11308	11280	673	11052	11169	885	15	1	0	0	0	0	0	0	0	0	0	0	0	0	0	0	0	0	0	0	0	0	0	0	0	0	0	0	0	0	0.000	0.000	0.000	0.000	0.000	0.000
1	5	5	Buffer	n/a	4997	10576	400	11822	11937	657	11052	11039	688	62	24	0	0	0	0	0	0	0	0	0	0	0	0	0	0	0	0	0	0	0	0	0	0	0	0	0	0	0	0	0.000	0.000	0.000	0.000	0.000	0.000
1	6	5	Buffer	n/a	5594	10576	400	11308	11318	592	11308	11261	761	14	0	0	0	0	0	0	0	0	0	0	0	0	0	0	0	0	0	0	0	0	0	0	0	0	0	0	0	0	0	0.000	0.000	0.000	0.000	0.000	0.000
2	1	1	BCCP-Myc1	n/a	6216	7512	400	12080	11609	994	10794	10706	716	67	32	0	0	0	0	0	0	0	0	0	0	0	0	0	0	0	0	0	0	0	0	0	0	0	0	0	0	0	0	0.000	0.000	0.000	0.000	0.000	0.000
2	2	1	BCCP-Myc1	n/a	6813	7512	400	12080	12197	943	11308	11663	2017	18	0	0	0	0	0	0	0	0	0	0	0	0	0	0	0	0	0	0	0	0	0	0	0	0	0	0	0	0	0	0.000	0.000	0.000	0.000	0.000	0.000
2	3	1	empty	empty	7411	7512	400	11308	11355	774	11308	11224	629	24	9	0	0	0	0	0	0	0	0	0	0	0	0	0	0	0	0	0	0	0	0	0	0	0	0	0	0	0	0	0.000	0.000	0.000	0.000	0.000	0.000
2	4	1	empty	empty	8008	7512	400	12080	11899	656	12080	12090	568	9	1	0	0	0	0	0	0	0	0	0	0	0	0	0	0	0	0	0	0	0	0	0	0	0	0	0	0	0	0	0.000	0.000	0.000	0.000	0.000	0.000
2	5	1	empty	empty	8606	7512	400	12080	11947	681	12594	12637	736	0	0	0	0	0	0	0	0	0	0	0	0	0	0	0	0	0	0	0	0	0	0	0	0	0	0	0	0	0	0	0.000	0.000	0.000	0.000	0.000	0.000
2	6	1	empty	empty	9203	7512	400	12594	13356	2517	12594	12525	664	24	17	0	0	0	0	0	0	0	0	0	0	0	0	0	0	0	0	0	0	0	0	0	0	0	0	0	0	0	0	0.000	0.000	0.000	0.000	0.000	0.000
2	1	2	feline sarcoma oncogene	P000025	6216	8266	400	13108	13155	1362	11052	11665	1485	68	30	0	0	0	0	0	0	0	0	0	0	0	0	0	0	0	0	0	0	0	0	0	0	0	0	0	0	0	0	0.000	0.000	0.000	0.000	0.000	0.000
2	2	2	feline sarcoma oncogene	P000025	6813	8266	400	12465	12571	746	10794	11136	1281	84	20	0	0	0	0	0	0	0	0	0	0	0	0	0	0	0	0	0	0	0	0	0	0	0	0	0	0	0	0	0.000	0.000	0.000	0.000	0.000	0.000
2	3	2	feline sarcoma oncogene	P000025	7411	8266	400	12594	12804	896	11822	12093	1546	21	1	0	0	0	0	0	0	0	0	0	0	0	0	0	0	0	0	0	0	0	0	0	0	0	0	0	0	0	0	0.000	0.000	0.000	0.000	0.000	0.000
2	4	2	feline sarcoma oncogene	P000025	8008	8266	400	12850	12841	912	12594	12646	929	22	2	0	0	0	0	0	0	0	0	0	0	0	0	0	0	0	0	0	0	0	0	0	0	0	0	0	0	0	0	0.000	0.000	0.000	0.000	0.000	0.000
2	5	2	bone morphogenetic protein receptor; type IA	P000112	8606	8266	400	12850	13069	987	12594	12659	893	23	11	0	0	0	0	0	0	0	0	0	0	0	0	0	0	0	0	0	0	0	0	0	0	0	0	0	0	0	0	0.000	0.000	0.000	0.000	0.000	0.000
2	6	2	bone morphogenetic protein receptor; type IA	P000112	9203	8266	400	13108	13273	1007	12594	12604	620	46	30	0	0	0	0	0	0	0	0	0	0	0	0	0	0	0	0	0	0	0	0	0	0	0	0	0	0	0	0	0.000	0.000	0.000	0.000	0.000	0.000
2	1	3	bone morphogenetic protein receptor; type IA	P000112	6216	9019	400	13364	13383	1508	10794	11035	908	84	64	0	0	0	0	0	0	0	0	0	0	0	0	0	0	0	0	0	0	0	0	0	0	0	0	0	0	0	0	0.000	0.000	0.000	0.000	0.000	0.000
2	2	3	bone morphogenetic protein receptor; type IA	P000112	6813	9019	400	13108	13268	1121	11308	11240	712	90	61	0	0	0	0	0	0	0	0	0	0	0	0	0	0	0	0	0	0	0	0	0	0	0	0	0	0	0	0	0.000	0.000	0.000	0.000	0.000	0.000
2	3	3	phospholipase D2	P000311	7411	9019	400	12080	12172	1155	11822	11700	687	42	24	0	0	0	0	0	0	0	0	0	0	0	0	0	0	0	0	0	0	0	0	0	0	0	0	0	0	0	0	0.000	0.000	0.000	0.000	0.000	0.000
2	4	3	phospholipase D2	P000311	8008	9019	400	12850	12971	1020	12336	12325	868	35	15	0	0	0	0	0	0	0	0	0	0	0	0	0	0	0	0	0	0	0	0	0	0	0	0	0	0	0	0	0.000	0.000	0.000	0.000	0.000	0.000
2	5	3	phospholipase D2	P000311	8606	9019	400	12850	12910	556	12336	12538	1044	16	0	0	0	0	0	0	0	0	0	0	0	0	0	0	0	0	0	0	0	0	0	0	0	0	0	0	0	0	0	0.000	0.000	0.000	0.000	0.000	0.000
2	6	3	phospholipase D2	P000311	9203	9019	400	12594	12658	619	12594	12496	867	13	0	0	0	0	0	0	0	0	0	0	0	0	0	0	0	0	0	0	0	0	0	0	0	0	0	0	0	0	0	0.000	0.000	0.000	0.000	0.000	0.000
2	1	4	macrophage migration inhibitory factor (glycosylation-inhibiting factor)	P000412	6216	9773	400	12594	12518	592	11052	10933	749	91	56	0	0	0	0	0	0	0	0	0	0	0	0	0	0	0	0	0	0	0	0	0	0	0	0	0	0	0	0	0.000	0.000	0.000	0.000	0.000	0.000
2	2	4	macrophage migration inhibitory factor (glycosylation-inhibiting factor)	P000412	6813	9773	400	12594	12572	733	11566	11530	518	64	47	0	0	0	0	0	0	0	0	0	0	0	0	0	0	0	0	0	0	0	0	0	0	0	0	0	0	0	0	0.000	0.000	0.000	0.000	0.000	0.000
2	3	4	macrophage migration inhibitory factor (glycosylation-inhibiting factor)	P000412	7411	9773	400	13108	13083	813	12080	11980	668	66	28	0	0	0	0	0	0	0	0	0	0	0	0	0	0	0	0	0	0	0	0	0	0	0	0	0	0	0	0	0.000	0.000	0.000	0.000	0.000	0.000
2	4	4	macrophage migration inhibitory factor (glycosylation-inhibiting factor)	P000412	8008	9773	400	13108	13076	1565	12080	12245	641	63	32	0	0	0	0	0	0	0	0	0	0	0	0	0	0	0	0	0	0	0	0	0	0	0	0	0	0	0	0	0.000	0.000	0.000	0.000	0.000	0.000
2	5	4	v-myb myeloblastosis viral oncogene homolog (avian)-like 2	P000510	8606	9773	400	12850	12749	733	12336	12210	857	26	3	0	0	0	0	0	0	0	0	0	0	0	0	0	0	0	0	0	0	0	0	0	0	0	0	0	0	0	0	0.000	0.000	0.000	0.000	0.000	0.000
2	6	4	v-myb myeloblastosis viral oncogene homolog (avian)-like 2	P000510	9203	9773	400	13622	13480	740	12080	12039	783	75	37	0	0	0	0	0	0	0	0	0	0	0	0	0	0	0	0	0	0	0	0	0	0	0	0	0	0	0	0	0.000	0.000	0.000	0.000	0.000	0.000
2	1	5	v-myb myeloblastosis viral oncogene homolog (avian)-like 2	P000510	6216	10526	400	12850	12649	742	11822	11726	870	51	13	0	0	0	0	0	0	0	0	0	0	0	0	0	0	0	0	0	0	0	0	0	0	0	0	0	0	0	0	0.000	0.000	0.000	0.000	0.000	0.000
2	2	5	v-myb myeloblastosis viral oncogene homolog (avian)-like 2	P000510	6813	10526	400	12850	12802	687	12080	12118	641	60	23	0	0	0	0	0	0	0	0	0	0	0	0	0	0	0	0	0	0	0	0	0	0	0	0	0	0	0	0	0.000	0.000	0.000	0.000	0.000	0.000
2	3	5	adrenergic; beta; receptor kinase 2	P001034	7411	10526	400	13108	13192	628	12594	12658	1013	16	5	0	0	0	0	0	0	0	0	0	0	0	0	0	0	0	0	0	0	0	0	0	0	0	0	0	0	0	0	0.000	0.000	0.000	0.000	0.000	0.000
2	4	5	adrenergic; beta; receptor kinase 2	P001034	8008	10526	400	12594	12579	508	12594	12529	804	7	0	0	0	0	0	0	0	0	0	0	0	0	0	0	0	0	0	0	0	0	0	0	0	0	0	0	0	0	0	0.000	0.000	0.000	0.000	0.000	0.000
2	5	5	adrenergic; beta; receptor kinase 2	P001034	8606	10526	400	13108	13038	845	12594	12531	803	31	7	0	0	0	0	0	0	0	0	0	0	0	0	0	0	0	0	0	0	0	0	0	0	0	0	0	0	0	0	0.000	0.000	0.000	0.000	0.000	0.000
2	6	5	adrenergic; beta; receptor kinase 2	P001034	9203	10526	400	13108	13090	856	12336	12284	552	60	34	0	0	0	0	0	0	0	0	0	0	0	0	0	0	0	0	0	0	0	0	0	0	0	0	0	0	0	0	0.000	0.000	0.000	0.000	0.000	0.000
3	1	1	Phosphopeptide1	empty	9875	7513	400	12080	11993	689	12080	12800	2439	0	0	0	0	0	0	0	0	0	0	0	0	0	0	0	0	0	0	0	0	0	0	0	0	0	0	0	0	0	0	0.000	0.000	0.000	0.000	0.000	0.000
3	2	1	Phosphopeptide1	empty	10472	7513	400	11566	11743	573	11566	11564	832	12	0	0	0	0	0	0	0	0	0	0	0	0	0	0	0	0	0	0	0	0	0	0	0	0	0	0	0	0	0	0.000	0.000	0.000	0.000	0.000	0.000
3	3	1	empty	empty	11070	7513	400	11308	11449	930	11052	11136	745	27	6	0	0	0	0	0	0	0	0	0	0	0	0	0	0	0	0	0	0	0	0	0	0	0	0	0	0	0	0	0.000	0.000	0.000	0.000	0.000	0.000
3	4	1	empty	empty	11667	7513	400	10794	10812	769	11052	11032	698	11	0	0	0	0	0	0	0	0	0	0	0	0	0	0	0	0	0	0	0	0	0	0	0	0	0	0	0	0	0	0.000	0.000	0.000	0.000	0.000	0.000
3	5	1	empty	empty	12265	7513	400	10280	10404	583	10538	10349	714	11	0	0	0	0	0	0	0	0	0	0	0	0	0	0	0	0	0	0	0	0	0	0	0	0	0	0	0	0	0	0.000	0.000	0.000	0.000	0.000	0.000
3	6	1	empty	empty	12862	7513	400	10538	10363	1034	10024	10076	939	34	4	0	0	0	0	0	0	0	0	0	0	0	0	0	0	0	0	0	0	0	0	0	0	0	0	0	0	0	0	0.000	0.000	0.000	0.000	0.000	0.000
3	1	2	serine/threonine kinase 6; transcript variant 1	P000003	9875	8267	400	12979	12998	915	12080	14212	5869	0	0	0	0	0	0	0	0	0	0	0	0	0	0	0	0	0	0	0	0	0	0	0	0	0	0	0	0	0	0	0.000	0.000	0.000	0.000	0.000	0.000
3	2	2	serine/threonine kinase 6; transcript variant 1	P000003	10472	8267	400	12336	12280	445	12336	12230	643	0	0	0	0	0	0	0	0	0	0	0	0	0	0	0	0	0	0	0	0	0	0	0	0	0	0	0	0	0	0	0.000	0.000	0.000	0.000	0.000	0.000
3	3	2	serine/threonine kinase 6; transcript variant 1	P000003	11070	8267	400	12465	12546	723	11308	11267	514	91	66	0	0	0	0	0	0	0	0	0	0	0	0	0	0	0	0	0	0	0	0	0	0	0	0	0	0	0	0	0.000	0.000	0.000	0.000	0.000	0.000
3	4	2	serine/threonine kinase 6; transcript variant 1	P000003	11667	8267	400	12336	12410	900	11566	11525	749	59	29	0	0	0	0	0	0	0	0	0	0	0	0	0	0	0	0	0	0	0	0	0	0	0	0	0	0	0	0	0.000	0.000	0.000	0.000	0.000	0.000
3	5	2	protein kinase D2	P000086	12265	8267	400	15934	17462	3776	10794	10979	902	100	97	0	0	0	0	0	0	0	0	0	0	0	0	0	0	0	0	0	0	0	0	0	0	0	0	0	0	0	0	0.000	0.000	0.000	0.000	0.000	0.000
3	6	2	protein kinase D2	P000086	12862	8267	400	15934	16317	2806	10794	10569	719	98	96	0	0	0	0	0	0	0	0	0	0	0	0	0	0	0	0	0	0	0	0	0	0	0	0	0	0	0	0	0.000	0.000	0.000	0.000	0.000	0.000
3	1	3	protein kinase D2	P000086	9875	9020	400	14650	14626	1132	12336	12285	612	92	84	0	0	0	0	0	0	0	0	0	0	0	0	0	0	0	0	0	0	0	0	0	0	0	0	0	0	0	0	0.000	0.000	0.000	0.000	0.000	0.000
3	2	3	protein kinase D2	P000086	10472	9020	400	15164	14942	846	12080	12202	742	100	97	0	0	0	0	0	0	0	0	0	0	0	0	0	0	0	0	0	0	0	0	0	0	0	0	0	0	0	0	0.000	0.000	0.000	0.000	0.000	0.000
3	3	3	cystatin B (stefin B)	P000292	11070	9020	400	12594	12534	432	11822	11674	719	66	0	0	0	0	0	0	0	0	0	0	0	0	0	0	0	0	0	0	0	0	0	0	0	0	0	0	0	0	0	0.000	0.000	0.000	0.000	0.000	0.000
3	4	3	cystatin B (stefin B)	P000292	11667	9020	400	12594	12879	1226	11822	11722	821	43	22	0	0	0	0	0	0	0	0	0	0	0	0	0	0	0	0	0	0	0	0	0	0	0	0	0	0	0	0	0.000	0.000	0.000	0.000	0.000	0.000
3	5	3	cystatin B (stefin B)	P000292	12265	9020	400	12080	12203	1503	11308	11486	754	52	32	0	0	0	0	0	0	0	0	0	0	0	0	0	0	0	0	0	0	0	0	0	0	0	0	0	0	0	0	0.000	0.000	0.000	0.000	0.000	0.000
3	6	3	cystatin B (stefin B)	P000292	12862	9020	400	12336	12579	1674	10794	10904	869	69	39	0	0	0	0	0	0	0	0	0	0	0	0	0	0	0	0	0	0	0	0	0	0	0	0	0	0	0	0	0.000	0.000	0.000	0.000	0.000	0.000
3	1	4	indoleamine-pyrrole 2 3 dioxygenase	P000380	9875	9774	400	12594	12557	719	12336	12212	804	14	4	0	0	0	0	0	0	0	0	0	0	0	0	0	0	0	0	0	0	0	0	0	0	0	0	0	0	0	0	0.000	0.000	0.000	0.000	0.000	0.000
3	2	4	indoleamine-pyrrole 2 3 dioxygenase	P000380	10472	9774	400	12594	12731	718	11822	12163	1211	29	5	0	0	0	0	0	0	0	0	0	0	0	0	0	0	0	0	0	0	0	0	0	0	0	0	0	0	0	0	0.000	0.000	0.000	0.000	0.000	0.000
3	3	4	indoleamine-pyrrole 2 3 dioxygenase	P000380	11070	9774	400	12080	12135	658	11566	11676	869	26	7	0	0	0	0	0	0	0	0	0	0	0	0	0	0	0	0	0	0	0	0	0	0	0	0	0	0	0	0	0.000	0.000	0.000	0.000	0.000	0.000
3	4	4	indoleamine-pyrrole 2 3 dioxygenase	P000380	11667	9774	400	12336	12266	535	11052	10953	400	93	73	0	0	0	0	0	0	0	0	0	0	0	0	0	0	0	0	0	0	0	0	0	0	0	0	0	0	0	0	0.000	0.000	0.000	0.000	0.000	0.000
3	5	4	MAX protein; transcript variant 2	P000485	12265	9774	400	14650	14456	1460	11052	11214	883	92	85	0	0	0	0	0	0	0	0	0	0	0	0	0	0	0	0	0	0	0	0	0	0	0	0	0	0	0	0	0.000	0.000	0.000	0.000	0.000	0.000
3	6	4	MAX protein; transcript variant 2	P000485	12862	9774	400	15934	15410	1858	10794	10884	887	95	90	0	0	0	0	0	0	0	0	0	0	0	0	0	0	0	0	0	0	0	0	0	0	0	0	0	0	0	0	0.000	0.000	0.000	0.000	0.000	0.000
3	1	5	MAX protein; transcript variant 2	P000485	9875	10527	400	15420	15362	1187	12080	11879	670	98	93	0	0	0	0	0	0	0	0	0	0	0	0	0	0	0	0	0	0	0	0	0	0	0	0	0	0	0	0	0.000	0.000	0.000	0.000	0.000	0.000
3	2	5	MAX protein; transcript variant 2	P000485	10472	10527	400	14136	13972	1049	11308	11632	1385	84	55	0	0	0	0	0	0	0	0	0	0	0	0	0	0	0	0	0	0	0	0	0	0	0	0	0	0	0	0	0.000	0.000	0.000	0.000	0.000	0.000
3	3	5	hypoxia inducible factor 3; alpha subunit	P000638	11070	10527	400	12336	12464	1210	11566	11700	1071	41	14	0	0	0	0	0	0	0	0	0	0	0	0	0	0	0	0	0	0	0	0	0	0	0	0	0	0	0	0	0.000	0.000	0.000	0.000	0.000	0.000
3	4	5	hypoxia inducible factor 3; alpha subunit	P000638	11667	10527	400	12594	12437	826	10794	10914	665	89	61	0	0	0	0	0	0	0	0	0	0	0	0	0	0	0	0	0	0	0	0	0	0	0	0	0	0	0	0	0.000	0.000	0.000	0.000	0.000	0.000
3	5	5	hypoxia inducible factor 3; alpha subunit	P000638	12265	10527	400	11052	11135	683	11052	11164	970	12	0	0	0	0	0	0	0	0	0	0	0	0	0	0	0	0	0	0	0	0	0	0	0	0	0	0	0	0	0	0.000	0.000	0.000	0.000	0.000	0.000
3	6	5	hypoxia inducible factor 3; alpha subunit	P000638	12862	10527	400	11308	11361	670	11566	11546	855	6	0	0	0	0	0	0	0	0	0	0	0	0	0	0	0	0	0	0	0	0	0	0	0	0	0	0	0	0	0	0.000	0.000	0.000	0.000	0.000	0.000
4	1	1	Cy5/Cy3 labeled biotin-BSA marker proteins	n/a	13533	7538	400	10280	10898	1788	10024	10041	679	39	24	0	0	0	0	0	0	0	0	0	0	0	0	0	0	0	0	0	0	0	0	0	0	0	0	0	0	0	0	0.000	0.000	0.000	0.000	0.000	0.000
4	2	1	Cy5/Cy3 labeled biotin-BSA marker proteins	n/a	14130	7538	400	9510	9655	940	9124	9334	803	24	10	0	0	0	0	0	0	0	0	0	0	0	0	0	0	0	0	0	0	0	0	0	0	0	0	0	0	0	0	0.000	0.000	0.000	0.000	0.000	0.000
4	3	1	empty	empty	14728	7538	400	9510	9550	610	9510	9629	791	6	0	0	0	0	0	0	0	0	0	0	0	0	0	0	0	0	0	0	0	0	0	0	0	0	0	0	0	0	0	0.000	0.000	0.000	0.000	0.000	0.000
4	4	1	empty	empty	15325	7538	400	9510	9400	575	9766	9740	511	8	0	0	0	0	0	0	0	0	0	0	0	0	0	0	0	0	0	0	0	0	0	0	0	0	0	0	0	0	0	0.000	0.000	0.000	0.000	0.000	0.000
4	5	1	empty	empty	15923	7538	400	8996	9019	648	9766	9585	736	2	0	0	0	0	0	0	0	0	0	0	0	0	0	0	0	0	0	0	0	0	0	0	0	0	0	0	0	0	0	0.000	0.000	0.000	0.000	0.000	0.000
4	6	1	empty	empty	16520	7538	400	9510	9467	595	9510	9597	1232	1	0	0	0	0	0	0	0	0	0	0	0	0	0	0	0	0	0	0	0	0	0	0	0	0	0	0	0	0	0	0.000	0.000	0.000	0.000	0.000	0.000
4	1	2	Beta-galactosidase (expressed with BCCP-Myc tag)	n/a	13533	8292	400	12336	12800	2048	10538	10671	726	74	58	0	0	0	0	0	0	0	0	0	0	0	0	0	0	0	0	0	0	0	0	0	0	0	0	0	0	0	0	0.000	0.000	0.000	0.000	0.000	0.000
4	2	2	Beta-galactosidase (expressed with BCCP-Myc tag)	n/a	14130	8292	400	10024	10196	1510	10280	10298	1036	16	8	0	0	0	0	0	0	0	0	0	0	0	0	0	0	0	0	0	0	0	0	0	0	0	0	0	0	0	0	0.000	0.000	0.000	0.000	0.000	0.000
4	3	2	Beta-galactosidase (expressed with BCCP-Myc tag)	n/a	14728	8292	400	10794	10856	653	10024	9912	665	57	22	0	0	0	0	0	0	0	0	0	0	0	0	0	0	0	0	0	0	0	0	0	0	0	0	0	0	0	0	0.000	0.000	0.000	0.000	0.000	0.000
4	4	2	Beta-galactosidase (expressed with BCCP-Myc tag)	n/a	15325	8292	400	10280	10283	455	10024	9821	714	19	0	0	0	0	0	0	0	0	0	0	0	0	0	0	0	0	0	0	0	0	0	0	0	0	0	0	0	0	0	0.000	0.000	0.000	0.000	0.000	0.000
4	5	2	signal transducer and activator of transcription 1; 91kDa	P000068	15923	8292	400	10794	10746	1341	10024	9820	798	42	12	0	0	0	0	0	0	0	0	0	0	0	0	0	0	0	0	0	0	0	0	0	0	0	0	0	0	0	0	0.000	0.000	0.000	0.000	0.000	0.000
4	6	2	signal transducer and activator of transcription 1; 91kDa	P000068	16520	8292	400	10794	10809	590	9252	9049	812	85	47	0	0	0	0	0	0	0	0	0	0	0	0	0	0	0	0	0	0	0	0	0	0	0	0	0	0	0	0	0.000	0.000	0.000	0.000	0.000	0.000
4	1	3	signal transducer and activator of transcription 1; 91kDa	P000068	13533	9045	400	13622	13949	1429	10538	10520	768	99	93	0	0	0	0	0	0	0	0	0	0	0	0	0	0	0	0	0	0	0	0	0	0	0	0	0	0	0	0	0.000	0.000	0.000	0.000	0.000	0.000
4	2	3	signal transducer and activator of transcription 1; 91kDa	P000068	14130	9045	400	11566	11700	1171	10280	10343	1003	65	26	0	0	0	0	0	0	0	0	0	0	0	0	0	0	0	0	0	0	0	0	0	0	0	0	0	0	0	0	0.000	0.000	0.000	0.000	0.000	0.000
4	3	3	ras homolog gene family; member H	P000245	14728	9045	400	10538	10517	563	10024	10144	713	36	7	0	0	0	0	0	0	0	0	0	0	0	0	0	0	0	0	0	0	0	0	0	0	0	0	0	0	0	0	0.000	0.000	0.000	0.000	0.000	0.000
4	4	3	ras homolog gene family; member H	P000245	15325	9045	400	10794	10690	915	10280	10665	1478	12	0	0	0	0	0	0	0	0	0	0	0	0	0	0	0	0	0	0	0	0	0	0	0	0	0	0	0	0	0	0.000	0.000	0.000	0.000	0.000	0.000
4	5	3	ras homolog gene family; member H	P000245	15923	9045	400	10794	10767	817	9766	9825	790	52	17	0	0	0	0	0	0	0	0	0	0	0	0	0	0	0	0	0	0	0	0	0	0	0	0	0	0	0	0	0.000	0.000	0.000	0.000	0.000	0.000
4	6	3	ras homolog gene family; member H	P000245	16520	9045	400	10794	13018	5601	9766	9626	685	68	43	0	0	0	0	0	0	0	0	0	0	0	0	0	0	0	0	0	0	0	0	0	0	0	0	0	0	0	0	0.000	0.000	0.000	0.000	0.000	0.000
4	1	4	protein phosphatase 2 (formerly 2A); regulatory subunit B (PR 52); gamma isoform	P000350	13533	9799	400	11822	12183	1315	10538	10475	455	94	72	0	0	0	0	0	0	0	0	0	0	0	0	0	0	0	0	0	0	0	0	0	0	0	0	0	0	0	0	0.000	0.000	0.000	0.000	0.000	0.000
4	2	4	protein phosphatase 2 (formerly 2A); regulatory subunit B (PR 52); gamma isoform	P000350	14130	9799	400	11822	11668	640	10794	10686	730	66	20	0	0	0	0	0	0	0	0	0	0	0	0	0	0	0	0	0	0	0	0	0	0	0	0	0	0	0	0	0.000	0.000	0.000	0.000	0.000	0.000
4	3	4	protein phosphatase 2 (formerly 2A); regulatory subunit B (PR 52); gamma isoform	P000350	14728	9799	400	10794	10827	762	10280	10353	531	41	19	0	0	0	0	0	0	0	0	0	0	0	0	0	0	0	0	0	0	0	0	0	0	0	0	0	0	0	0	0.000	0.000	0.000	0.000	0.000	0.000
4	4	4	protein phosphatase 2 (formerly 2A); regulatory subunit B (PR 52); gamma isoform	P000350	15325	9799	400	10280	10212	867	9766	9787	931	36	0	0	0	0	0	0	0	0	0	0	0	0	0	0	0	0	0	0	0	0	0	0	0	0	0	0	0	0	0	0.000	0.000	0.000	0.000	0.000	0.000
4	5	4	calmodulin 1 (phosphorylase kinase; delta)	P000451	15923	9799	400	10024	9958	615	9766	9741	818	15	0	0	0	0	0	0	0	0	0	0	0	0	0	0	0	0	0	0	0	0	0	0	0	0	0	0	0	0	0	0.000	0.000	0.000	0.000	0.000	0.000
4	6	4	calmodulin 1 (phosphorylase kinase; delta)	P000451	16520	9799	400	10024	9794	714	10024	9851	806	1	0	0	0	0	0	0	0	0	0	0	0	0	0	0	0	0	0	0	0	0	0	0	0	0	0	0	0	0	0	0.000	0.000	0.000	0.000	0.000	0.000
4	1	5	calmodulin 1 (phosphorylase kinase; delta)	P000451	13533	10552	400	11308	11536	1500	10280	10494	1469	27	6	0	0	0	0	0	0	0	0	0	0	0	0	0	0	0	0	0	0	0	0	0	0	0	0	0	0	0	0	0.000	0.000	0.000	0.000	0.000	0.000
4	2	5	calmodulin 1 (phosphorylase kinase; delta)	P000451	14130	10552	400	10280	10384	333	10024	10050	696	16	0	0	0	0	0	0	0	0	0	0	0	0	0	0	0	0	0	0	0	0	0	0	0	0	0	0	0	0	0	0.000	0.000	0.000	0.000	0.000	0.000
4	3	5	calcium/calmodulin-dependent protein kinase (CaM kinase) II beta	P000563	14728	10552	400	11566	11597	859	10024	9917	854	72	45	0	0	0	0	0	0	0	0	0	0	0	0	0	0	0	0	0	0	0	0	0	0	0	0	0	0	0	0	0.000	0.000	0.000	0.000	0.000	0.000
4	4	5	calcium/calmodulin-dependent protein kinase (CaM kinase) II beta	P000563	15325	10552	400	11052	11087	1021	9510	9545	900	71	31	0	0	0	0	0	0	0	0	0	0	0	0	0	0	0	0	0	0	0	0	0	0	0	0	0	0	0	0	0.000	0.000	0.000	0.000	0.000	0.000
4	5	5	calcium/calmodulin-dependent protein kinase (CaM kinase) II beta	P000563	15923	10552	400	10280	10413	961	9766	9703	608	46	27	0	0	0	0	0	0	0	0	0	0	0	0	0	0	0	0	0	0	0	0	0	0	0	0	0	0	0	0	0.000	0.000	0.000	0.000	0.000	0.000
4	6	5	calcium/calmodulin-dependent protein kinase (CaM kinase) II beta	P000563	16520	10552	400	10794	10971	898	9766	9771	766	70	38	0	0	0	0	0	0	0	0	0	0	0	0	0	0	0	0	0	0	0	0	0	0	0	0	0	0	0	0	0.000	0.000	0.000	0.000	0.000	0.000
5	1	1	Cy5/Cy3 labeled biotin-BSA marker proteins	n/a	2581	11196	400	12080	12130	918	11822	11882	567	39	19	0	0	0	0	0	0	0	0	0	0	0	0	0	0	0	0	0	0	0	0	0	0	0	0	0	0	0	0	0.000	0.000	0.000	0.000	0.000	0.000
5	2	1	Cy5/Cy3 labeled biotin-BSA marker proteins	n/a	3178	11196	400	11566	11630	928	11566	11615	766	31	8	0	0	0	0	0	0	0	0	0	0	0	0	0	0	0	0	0	0	0	0	0	0	0	0	0	0	0	0	0.000	0.000	0.000	0.000	0.000	0.000
5	3	1	empty	empty	3776	11196	400	11052	11006	722	12080	12332	1879	0	0	0	0	0	0	0	0	0	0	0	0	0	0	0	0	0	0	0	0	0	0	0	0	0	0	0	0	0	0	0.000	0.000	0.000	0.000	0.000	0.000
5	4	1	empty	empty	4373	11196	400	12080	12199	611	12080	12388	2438	0	0	0	0	0	0	0	0	0	0	0	0	0	0	0	0	0	0	0	0	0	0	0	0	0	0	0	0	0	0	0.000	0.000	0.000	0.000	0.000	0.000
5	5	1	empty	empty	4971	11196	400	12080	11949	945	11822	11753	880	23	5	0	0	0	0	0	0	0	0	0	0	0	0	0	0	0	0	0	0	0	0	0	0	0	0	0	0	0	0	0.000	0.000	0.000	0.000	0.000	0.000
5	6	1	empty	empty	5568	11196	400	11822	12371	1517	11822	11990	751	29	21	0	0	0	0	0	0	0	0	0	0	0	0	0	0	0	0	0	0	0	0	0	0	0	0	0	0	0	0	0.000	0.000	0.000	0.000	0.000	0.000
5	1	2	ribosomal protein S6 kinase; 90kDa; polypeptide 2	P000049	2581	11950	400	13364	12932	1086	11566	11333	737	74	60	0	0	0	0	0	0	0	0	0	0	0	0	0	0	0	0	0	0	0	0	0	0	0	0	0	0	0	0	0.000	0.000	0.000	0.000	0.000	0.000
5	2	2	ribosomal protein S6 kinase; 90kDa; polypeptide 2	P000049	3178	11950	400	13364	13233	854	11052	11156	775	93	76	0	0	0	0	0	0	0	0	0	0	0	0	0	0	0	0	0	0	0	0	0	0	0	0	0	0	0	0	0.000	0.000	0.000	0.000	0.000	0.000
5	3	2	ribosomal protein S6 kinase; 90kDa; polypeptide 2	P000049	3776	11950	400	11822	12186	1376	12336	12247	844	20	13	0	0	0	0	0	0	0	0	0	0	0	0	0	0	0	0	0	0	0	0	0	0	0	0	0	0	0	0	0.000	0.000	0.000	0.000	0.000	0.000
5	4	2	ribosomal protein S6 kinase; 90kDa; polypeptide 2	P000049	4373	11950	400	12594	12885	1877	11951	12312	1375	29	7	0	0	0	0	0	0	0	0	0	0	0	0	0	0	0	0	0	0	0	0	0	0	0	0	0	0	0	0	0.000	0.000	0.000	0.000	0.000	0.000
5	5	2	TNF receptor-associated factor 6; transcript variant 1	P000160	4971	11950	400	14650	15151	3538	12594	13485	2302	49	17	0	0	0	0	0	0	0	0	0	0	0	0	0	0	0	0	0	0	0	0	0	0	0	0	0	0	0	0	0.000	0.000	0.000	0.000	0.000	0.000
5	6	2	TNF receptor-associated factor 6; transcript variant 1	P000160	5568	11950	400	13622	13571	1384	12080	12120	719	63	52	0	0	0	0	0	0	0	0	0	0	0	0	0	0	0	0	0	0	0	0	0	0	0	0	0	0	0	0	0.000	0.000	0.000	0.000	0.000	0.000
5	1	3	TNF receptor-associated factor 6; transcript variant 1	P000160	2581	12703	400	13108	12976	1299	11566	11821	903	63	44	0	0	0	0	0	0	0	0	0	0	0	0	0	0	0	0	0	0	0	0	0	0	0	0	0	0	0	0	0.000	0.000	0.000	0.000	0.000	0.000
5	2	3	TNF receptor-associated factor 6; transcript variant 1	P000160	3178	12703	400	13622	13279	1017	12080	12323	1224	62	7	0	0	0	0	0	0	0	0	0	0	0	0	0	0	0	0	0	0	0	0	0	0	0	0	0	0	0	0	0.000	0.000	0.000	0.000	0.000	0.000
5	3	3	guanine nucleotide binding protein (G protein); alpha z polypeptide	P000334	3776	12703	400	14136	13941	1273	11566	11952	1477	78	36	0	0	0	0	0	0	0	0	0	0	0	0	0	0	0	0	0	0	0	0	0	0	0	0	0	0	0	0	0.000	0.000	0.000	0.000	0.000	0.000
5	4	3	guanine nucleotide binding protein (G protein); alpha z polypeptide	P000334	4373	12703	400	12850	12779	929	11308	11509	850	66	46	0	0	0	0	0	0	0	0	0	0	0	0	0	0	0	0	0	0	0	0	0	0	0	0	0	0	0	0	0.000	0.000	0.000	0.000	0.000	0.000
5	5	3	guanine nucleotide binding protein (G protein); alpha z polypeptide	P000334	4971	12703	400	13622	13395	1433	11822	12456	1926	49	6	0	0	0	0	0	0	0	0	0	0	0	0	0	0	0	0	0	0	0	0	0	0	0	0	0	0	0	0	0.000	0.000	0.000	0.000	0.000	0.000
5	6	3	guanine nucleotide binding protein (G protein); alpha z polypeptide	P000334	5568	12703	400	12850	13077	1057	11822	11726	581	71	49	0	0	0	0	0	0	0	0	0	0	0	0	0	0	0	0	0	0	0	0	0	0	0	0	0	0	0	0	0.000	0.000	0.000	0.000	0.000	0.000
5	1	4	hypoxanthine phosphoribosyltransferase 1 (Lesch-Nyhan syndrome)	P000437	2581	13457	400	12080	12160	782	11566	11579	628	44	27	0	0	0	0	0	0	0	0	0	0	0	0	0	0	0	0	0	0	0	0	0	0	0	0	0	0	0	0	0.000	0.000	0.000	0.000	0.000	0.000
5	2	4	hypoxanthine phosphoribosyltransferase 1 (Lesch-Nyhan syndrome)	P000437	3178	13457	400	12336	12264	960	11822	11908	969	38	5	0	0	0	0	0	0	0	0	0	0	0	0	0	0	0	0	0	0	0	0	0	0	0	0	0	0	0	0	0.000	0.000	0.000	0.000	0.000	0.000
5	3	4	hypoxanthine phosphoribosyltransferase 1 (Lesch-Nyhan syndrome)	P000437	3776	13457	400	12594	12403	1197	11566	11483	868	51	32	0	0	0	0	0	0	0	0	0	0	0	0	0	0	0	0	0	0	0	0	0	0	0	0	0	0	0	0	0.000	0.000	0.000	0.000	0.000	0.000
5	4	4	hypoxanthine phosphoribosyltransferase 1 (Lesch-Nyhan syndrome)	P000437	4373	13457	400	12336	12418	1212	11566	11641	701	52	32	0	0	0	0	0	0	0	0	0	0	0	0	0	0	0	0	0	0	0	0	0	0	0	0	0	0	0	0	0.000	0.000	0.000	0.000	0.000	0.000
5	5	4	suppressor of cytokine signaling 2	P000536	4971	13457	400	12336	12261	641	11566	11567	780	40	4	0	0	0	0	0	0	0	0	0	0	0	0	0	0	0	0	0	0	0	0	0	0	0	0	0	0	0	0	0.000	0.000	0.000	0.000	0.000	0.000
5	6	4	suppressor of cytokine signaling 2	P000536	5568	13457	400	12336	12289	1121	11566	11587	839	48	25	0	0	0	0	0	0	0	0	0	0	0	0	0	0	0	0	0	0	0	0	0	0	0	0	0	0	0	0	0.000	0.000	0.000	0.000	0.000	0.000
5	1	5	suppressor of cytokine signaling 2	P000536	2581	14210	400	12722	12700	1099	11822	11736	1109	44	11	0	0	0	0	0	0	0	0	0	0	0	0	0	0	0	0	0	0	0	0	0	0	0	0	0	0	0	0	0.000	0.000	0.000	0.000	0.000	0.000
5	2	5	suppressor of cytokine signaling 2	P000536	3178	14210	400	12850	12870	1041	11566	11575	959	68	29	0	0	0	0	0	0	0	0	0	0	0	0	0	0	0	0	0	0	0	0	0	0	0	0	0	0	0	0	0.000	0.000	0.000	0.000	0.000	0.000
5	3	5	Buffer	n/a	3776	14210	400	10794	13917	8779	11052	10831	1284	23	20	0	0	0	0	0	0	0	0	0	0	0	0	0	0	0	0	0	0	0	0	0	0	0	0	0	0	0	0	0.000	0.000	0.000	0.000	0.000	0.000
5	4	5	Buffer	n/a	4373	14210	400	10794	10864	465	11052	11212	618	5	0	0	0	0	0	0	0	0	0	0	0	0	0	0	0	0	0	0	0	0	0	0	0	0	0	0	0	0	0	0.000	0.000	0.000	0.000	0.000	0.000
5	5	5	Buffer	n/a	4971	14210	400	11566	11331	855	11308	11519	736	24	3	0	0	0	0	0	0	0	0	0	0	0	0	0	0	0	0	0	0	0	0	0	0	0	0	0	0	0	0	0.000	0.000	0.000	0.000	0.000	0.000
5	6	5	Buffer	n/a	5568	14210	400	11308	11529	1463	11308	11188	983	16	9	0	0	0	0	0	0	0	0	0	0	0	0	0	0	0	0	0	0	0	0	0	0	0	0	0	0	0	0	0.000	0.000	0.000	0.000	0.000	0.000
6	1	1	BCCP-Myc2	n/a	6240	11122	400	13622	13729	1635	12080	12000	523	63	54	0	0	0	0	0	0	0	0	0	0	0	0	0	0	0	0	0	0	0	0	0	0	0	0	0	0	0	0	0.000	0.000	0.000	0.000	0.000	0.000
6	2	1	BCCP-Myc2	n/a	6837	11122	400	12850	12849	858	12336	12254	733	44	18	0	0	0	0	0	0	0	0	0	0	0	0	0	0	0	0	0	0	0	0	0	0	0	0	0	0	0	0	0.000	0.000	0.000	0.000	0.000	0.000
6	3	1	empty	empty	7435	11122	400	12336	12185	530	11822	12037	947	13	0	0	0	0	0	0	0	0	0	0	0	0	0	0	0	0	0	0	0	0	0	0	0	0	0	0	0	0	0	0.000	0.000	0.000	0.000	0.000	0.000
6	4	1	empty	empty	8032	11122	400	12850	12942	744	12336	12180	620	48	20	0	0	0	0	0	0	0	0	0	0	0	0	0	0	0	0	0	0	0	0	0	0	0	0	0	0	0	0	0.000	0.000	0.000	0.000	0.000	0.000
6	5	1	empty	empty	8630	11122	400	12594	12981	1814	12594	12693	626	21	16	0	0	0	0	0	0	0	0	0	0	0	0	0	0	0	0	0	0	0	0	0	0	0	0	0	0	0	0	0.000	0.000	0.000	0.000	0.000	0.000
6	6	1	empty	empty	9227	11122	400	12080	12450	948	12336	12236	533	28	19	0	0	0	0	0	0	0	0	0	0	0	0	0	0	0	0	0	0	0	0	0	0	0	0	0	0	0	0	0.000	0.000	0.000	0.000	0.000	0.000
6	1	2	serine/threonine kinase 22C (spermiogenesis associated)	P000026	6240	11876	400	13622	13630	1086	12080	12128	520	77	63	0	0	0	0	0	0	0	0	0	0	0	0	0	0	0	0	0	0	0	0	0	0	0	0	0	0	0	0	0.000	0.000	0.000	0.000	0.000	0.000
6	2	2	serine/threonine kinase 22C (spermiogenesis associated)	P000026	6837	11876	400	13622	13387	971	11822	12381	1978	43	0	0	0	0	0	0	0	0	0	0	0	0	0	0	0	0	0	0	0	0	0	0	0	0	0	0	0	0	0	0.000	0.000	0.000	0.000	0.000	0.000
6	3	2	serine/threonine kinase 22C (spermiogenesis associated)	P000026	7435	11876	400	13364	13390	1288	12080	12074	616	63	53	0	0	0	0	0	0	0	0	0	0	0	0	0	0	0	0	0	0	0	0	0	0	0	0	0	0	0	0	0.000	0.000	0.000	0.000	0.000	0.000
6	4	2	serine/threonine kinase 22C (spermiogenesis associated)	P000026	8032	11876	400	13108	13330	1352	12080	11967	736	64	45	0	0	0	0	0	0	0	0	0	0	0	0	0	0	0	0	0	0	0	0	0	0	0	0	0	0	0	0	0.000	0.000	0.000	0.000	0.000	0.000
6	5	2	protein kinase; cAMP-dependent; regulatory; type I; alpha (tissue specific extinguisher 1)	P000113	8630	11876	400	15164	14999	1708	11822	11976	814	88	79	0	0	0	0	0	0	0	0	0	0	0	0	0	0	0	0	0	0	0	0	0	0	0	0	0	0	0	0	0.000	0.000	0.000	0.000	0.000	0.000
6	6	2	protein kinase; cAMP-dependent; regulatory; type I; alpha (tissue specific extinguisher 1)	P000113	9227	11876	400	14650	14634	1371	11822	11791	726	96	81	0	0	0	0	0	0	0	0	0	0	0	0	0	0	0	0	0	0	0	0	0	0	0	0	0	0	0	0	0.000	0.000	0.000	0.000	0.000	0.000
6	1	3	protein kinase; cAMP-dependent; regulatory; type I; alpha (tissue specific extinguisher 1)	P000113	6240	12629	400	15934	15762	1749	11566	11730	624	96	93	0	0	0	0	0	0	0	0	0	0	0	0	0	0	0	0	0	0	0	0	0	0	0	0	0	0	0	0	0.000	0.000	0.000	0.000	0.000	0.000
6	2	3	protein kinase; cAMP-dependent; regulatory; type I; alpha (tissue specific extinguisher 1)	P000113	6837	12629	400	15678	15533	1462	11822	11778	719	96	92	0	0	0	0	0	0	0	0	0	0	0	0	0	0	0	0	0	0	0	0	0	0	0	0	0	0	0	0	0.000	0.000	0.000	0.000	0.000	0.000
6	3	3	related RAS viral (r-ras) oncogene homolog	P000313	7435	12629	400	13364	13336	664	11822	11772	650	88	60	0	0	0	0	0	0	0	0	0	0	0	0	0	0	0	0	0	0	0	0	0	0	0	0	0	0	0	0	0.000	0.000	0.000	0.000	0.000	0.000
6	4	3	related RAS viral (r-ras) oncogene homolog	P000313	8032	12629	400	13364	13428	1449	11566	11594	695	82	62	0	0	0	0	0	0	0	0	0	0	0	0	0	0	0	0	0	0	0	0	0	0	0	0	0	0	0	0	0.000	0.000	0.000	0.000	0.000	0.000
6	5	3	related RAS viral (r-ras) oncogene homolog	P000313	8630	12629	400	12850	12994	895	11308	11627	1819	37	2	0	0	0	0	0	0	0	0	0	0	0	0	0	0	0	0	0	0	0	0	0	0	0	0	0	0	0	0	0.000	0.000	0.000	0.000	0.000	0.000
6	6	3	related RAS viral (r-ras) oncogene homolog	P000313	9227	12629	400	12080	12066	961	11308	12396	3686	0	0	0	0	0	0	0	0	0	0	0	0	0	0	0	0	0	0	0	0	0	0	0	0	0	0	0	0	0	0	0.000	0.000	0.000	0.000	0.000	0.000
6	1	4	flap structure-specific endonuclease 1	P000413	6240	13383	400	14136	14142	1312	11822	11835	692	90	73	0	0	0	0	0	0	0	0	0	0	0	0	0	0	0	0	0	0	0	0	0	0	0	0	0	0	0	0	0.000	0.000	0.000	0.000	0.000	0.000
6	2	4	flap structure-specific endonuclease 1	P000413	6837	13383	400	14906	14648	2033	11566	11672	669	85	74	0	0	0	0	0	0	0	0	0	0	0	0	0	0	0	0	0	0	0	0	0	0	0	0	0	0	0	0	0.000	0.000	0.000	0.000	0.000	0.000
6	3	4	flap structure-specific endonuclease 1	P000413	7435	13383	400	13622	13636	1109	11052	11068	669	97	82	0	0	0	0	0	0	0	0	0	0	0	0	0	0	0	0	0	0	0	0	0	0	0	0	0	0	0	0	0.000	0.000	0.000	0.000	0.000	0.000
6	4	4	flap structure-specific endonuclease 1	P000413	8032	13383	400	14392	14658	2180	11566	11608	577	88	82	0	0	0	0	0	0	0	0	0	0	0	0	0	0	0	0	0	0	0	0	0	0	0	0	0	0	0	0	0.000	0.000	0.000	0.000	0.000	0.000
6	5	4	Src-like-adaptor	P000512	8630	13383	400	12594	12601	863	11052	11131	609	85	68	0	0	0	0	0	0	0	0	0	0	0	0	0	0	0	0	0	0	0	0	0	0	0	0	0	0	0	0	0.000	0.000	0.000	0.000	0.000	0.000
6	6	4	Src-like-adaptor	P000512	9227	13383	400	13364	13340	1354	11052	11072	805	85	67	0	0	0	0	0	0	0	0	0	0	0	0	0	0	0	0	0	0	0	0	0	0	0	0	0	0	0	0	0.000	0.000	0.000	0.000	0.000	0.000
6	1	5	Src-like-adaptor	P000512	6240	14136	400	12336	12347	742	11308	11398	642	69	48	0	0	0	0	0	0	0	0	0	0	0	0	0	0	0	0	0	0	0	0	0	0	0	0	0	0	0	0	0.000	0.000	0.000	0.000	0.000	0.000
6	2	5	Src-like-adaptor	P000512	6837	14136	400	12594	12368	820	11822	11850	1160	19	0	0	0	0	0	0	0	0	0	0	0	0	0	0	0	0	0	0	0	0	0	0	0	0	0	0	0	0	0	0.000	0.000	0.000	0.000	0.000	0.000
6	3	5	STE20-like kinase	P001068	7435	14136	400	14906	14779	1850	11566	11596	843	86	80	0	0	0	0	0	0	0	0	0	0	0	0	0	0	0	0	0	0	0	0	0	0	0	0	0	0	0	0	0.000	0.000	0.000	0.000	0.000	0.000
6	4	5	STE20-like kinase	P001068	8032	14136	400	14906	14585	1553	11822	12029	854	83	74	0	0	0	0	0	0	0	0	0	0	0	0	0	0	0	0	0	0	0	0	0	0	0	0	0	0	0	0	0.000	0.000	0.000	0.000	0.000	0.000
6	5	5	STE20-like kinase	P001068	8630	14136	400	14136	14190	1781	11566	11741	599	85	78	0	0	0	0	0	0	0	0	0	0	0	0	0	0	0	0	0	0	0	0	0	0	0	0	0	0	0	0	0.000	0.000	0.000	0.000	0.000	0.000
6	6	5	STE20-like kinase	P001068	9227	14136	400	15678	16484	5184	11822	11863	590	79	71	0	0	0	0	0	0	0	0	0	0	0	0	0	0	0	0	0	0	0	0	0	0	0	0	0	0	0	0	0.000	0.000	0.000	0.000	0.000	0.000
7	1	1	Phosphopeptide2	empty	9924	11122	400	11822	12698	2243	11566	11456	657	39	31	0	0	0	0	0	0	0	0	0	0	0	0	0	0	0	0	0	0	0	0	0	0	0	0	0	0	0	0	0.000	0.000	0.000	0.000	0.000	0.000
7	2	1	Phosphopeptide2	empty	10521	11122	400	12080	11895	719	11052	11423	1129	40	0	0	0	0	0	0	0	0	0	0	0	0	0	0	0	0	0	0	0	0	0	0	0	0	0	0	0	0	0	0.000	0.000	0.000	0.000	0.000	0.000
7	3	1	empty	empty	11119	11122	400	11052	11370	968	11566	11852	1429	7	2	0	0	0	0	0	0	0	0	0	0	0	0	0	0	0	0	0	0	0	0	0	0	0	0	0	0	0	0	0.000	0.000	0.000	0.000	0.000	0.000
7	4	1	empty	empty	11716	11122	400	11308	11369	917	10538	10612	752	61	18	0	0	0	0	0	0	0	0	0	0	0	0	0	0	0	0	0	0	0	0	0	0	0	0	0	0	0	0	0.000	0.000	0.000	0.000	0.000	0.000
7	5	1	empty	empty	12314	11122	400	11566	11622	1149	11052	11153	1194	30	8	0	0	0	0	0	0	0	0	0	0	0	0	0	0	0	0	0	0	0	0	0	0	0	0	0	0	0	0	0.000	0.000	0.000	0.000	0.000	0.000
7	6	1	empty	empty	12911	11122	400	10794	11024	1541	11566	11502	1007	9	5	0	0	0	0	0	0	0	0	0	0	0	0	0	0	0	0	0	0	0	0	0	0	0	0	0	0	0	0	0.000	0.000	0.000	0.000	0.000	0.000
7	1	2	integrin-linked kinase	P000004	9924	11876	400	12080	11996	562	11308	11260	531	56	24	0	0	0	0	0	0	0	0	0	0	0	0	0	0	0	0	0	0	0	0	0	0	0	0	0	0	0	0	0.000	0.000	0.000	0.000	0.000	0.000
7	2	2	integrin-linked kinase	P000004	10521	11876	400	13622	13572	998	11052	11145	390	99	95	0	0	0	0	0	0	0	0	0	0	0	0	0	0	0	0	0	0	0	0	0	0	0	0	0	0	0	0	0.000	0.000	0.000	0.000	0.000	0.000
7	3	2	integrin-linked kinase	P000004	11119	11876	400	12336	12332	665	11052	11164	879	72	22	0	0	0	0	0	0	0	0	0	0	0	0	0	0	0	0	0	0	0	0	0	0	0	0	0	0	0	0	0.000	0.000	0.000	0.000	0.000	0.000
7	4	2	integrin-linked kinase	P000004	11716	11876	400	11822	11979	871	11052	11173	745	63	25	0	0	0	0	0	0	0	0	0	0	0	0	0	0	0	0	0	0	0	0	0	0	0	0	0	0	0	0	0.000	0.000	0.000	0.000	0.000	0.000
7	5	2	serine/threonine kinase 25 (STE20 homolog; yeast)	P000087	12314	11876	400	24801	23922	3754	10794	11146	1402	100	100	0	0	0	0	0	0	0	0	0	0	0	0	0	0	0	0	0	0	0	0	0	0	0	0	0	0	0	0	0.000	0.000	0.000	0.000	0.000	0.000
7	6	2	serine/threonine kinase 25 (STE20 homolog; yeast)	P000087	12911	11876	400	25700	24927	3941	11052	10934	1009	100	100	0	0	0	0	0	0	0	0	0	0	0	0	0	0	0	0	0	0	0	0	0	0	0	0	0	0	0	0	0.000	0.000	0.000	0.000	0.000	0.000
7	1	3	serine/threonine kinase 25 (STE20 homolog; yeast)	P000087	9924	12629	400	24672	24730	3544	11308	11728	2344	100	100	0	0	0	0	0	0	0	0	0	0	0	0	0	0	0	0	0	0	0	0	0	0	0	0	0	0	0	0	0.000	0.000	0.000	0.000	0.000	0.000
7	2	3	serine/threonine kinase 25 (STE20 homolog; yeast)	P000087	10521	12629	400	27242	26437	2697	11566	11723	725	100	100	0	0	0	0	0	0	0	0	0	0	0	0	0	0	0	0	0	0	0	0	0	0	0	0	0	0	0	0	0.000	0.000	0.000	0.000	0.000	0.000
7	3	3	annexin A1	P000298	11119	12629	400	13622	13564	686	11566	11477	803	93	73	0	0	0	0	0	0	0	0	0	0	0	0	0	0	0	0	0	0	0	0	0	0	0	0	0	0	0	0	0.000	0.000	0.000	0.000	0.000	0.000
7	4	3	annexin A1	P000298	11716	12629	400	13108	12890	1034	11566	11476	815	66	42	0	0	0	0	0	0	0	0	0	0	0	0	0	0	0	0	0	0	0	0	0	0	0	0	0	0	0	0	0.000	0.000	0.000	0.000	0.000	0.000
7	5	3	annexin A1	P000298	12314	12629	400	12850	13595	2400	11566	11827	1969	36	15	0	0	0	0	0	0	0	0	0	0	0	0	0	0	0	0	0	0	0	0	0	0	0	0	0	0	0	0	0.000	0.000	0.000	0.000	0.000	0.000
7	6	3	annexin A1	P000298	12911	12629	400	12850	13075	761	11308	11487	963	92	31	0	0	0	0	0	0	0	0	0	0	0	0	0	0	0	0	0	0	0	0	0	0	0	0	0	0	0	0	0.000	0.000	0.000	0.000	0.000	0.000
7	1	4	carbonic anhydrase I	P000381	9924	13383	400	11822	11911	787	11566	11548	707	41	8	0	0	0	0	0	0	0	0	0	0	0	0	0	0	0	0	0	0	0	0	0	0	0	0	0	0	0	0	0.000	0.000	0.000	0.000	0.000	0.000
7	2	4	carbonic anhydrase I	P000381	10521	13383	400	12594	15532	6203	11822	12390	2279	34	26	0	0	0	0	0	0	0	0	0	0	0	0	0	0	0	0	0	0	0	0	0	0	0	0	0	0	0	0	0.000	0.000	0.000	0.000	0.000	0.000
7	3	4	carbonic anhydrase I	P000381	11119	13383	400	12850	12897	968	12080	12206	864	44	22	0	0	0	0	0	0	0	0	0	0	0	0	0	0	0	0	0	0	0	0	0	0	0	0	0	0	0	0	0.000	0.000	0.000	0.000	0.000	0.000
7	4	4	carbonic anhydrase I	P000381	11716	13383	400	12594	12895	1140	11822	11957	850	39	21	0	0	0	0	0	0	0	0	0	0	0	0	0	0	0	0	0	0	0	0	0	0	0	0	0	0	0	0	0.000	0.000	0.000	0.000	0.000	0.000
7	5	4	Down syndrome critical region gene 1	P000488	12314	13383	400	13878	14024	1002	11822	11793	545	94	88	0	0	0	0	0	0	0	0	0	0	0	0	0	0	0	0	0	0	0	0	0	0	0	0	0	0	0	0	0.000	0.000	0.000	0.000	0.000	0.000
7	6	4	Down syndrome critical region gene 1	P000488	12911	13383	400	12850	12753	634	12080	12171	1193	19	0	0	0	0	0	0	0	0	0	0	0	0	0	0	0	0	0	0	0	0	0	0	0	0	0	0	0	0	0	0.000	0.000	0.000	0.000	0.000	0.000
7	1	5	Down syndrome critical region gene 1	P000488	9924	14136	400	13364	14099	2578	12080	12086	863	59	37	0	0	0	0	0	0	0	0	0	0	0	0	0	0	0	0	0	0	0	0	0	0	0	0	0	0	0	0	0.000	0.000	0.000	0.000	0.000	0.000
7	2	5	Down syndrome critical region gene 1	P000488	10521	14136	400	13108	13143	732	12336	12870	2045	9	0	0	0	0	0	0	0	0	0	0	0	0	0	0	0	0	0	0	0	0	0	0	0	0	0	0	0	0	0	0.000	0.000	0.000	0.000	0.000	0.000
7	3	5	estrogen receptor 2 (ER beta)	P000642	11119	14136	400	13364	13332	1130	11566	11868	902	74	43	0	0	0	0	0	0	0	0	0	0	0	0	0	0	0	0	0	0	0	0	0	0	0	0	0	0	0	0	0.000	0.000	0.000	0.000	0.000	0.000
7	4	5	estrogen receptor 2 (ER beta)	P000642	11716	14136	400	12594	12753	762	11822	11883	711	60	27	0	0	0	0	0	0	0	0	0	0	0	0	0	0	0	0	0	0	0	0	0	0	0	0	0	0	0	0	0.000	0.000	0.000	0.000	0.000	0.000
7	5	5	estrogen receptor 2 (ER beta)	P000642	12314	14136	400	12594	12628	757	11822	11904	486	69	44	0	0	0	0	0	0	0	0	0	0	0	0	0	0	0	0	0	0	0	0	0	0	0	0	0	0	0	0	0.000	0.000	0.000	0.000	0.000	0.000
7	6	5	estrogen receptor 2 (ER beta)	P000642	12911	14136	400	12594	12525	702	12594	12814	1242	3	0	0	0	0	0	0	0	0	0	0	0	0	0	0	0	0	0	0	0	0	0	0	0	0	0	0	0	0	0	0.000	0.000	0.000	0.000	0.000	0.000
8	1	1	Cy5/Cy3 labeled biotin-BSA marker proteins	n/a	13656	11097	400	10538	10432	829	9766	10220	1290	21	0	0	0	0	0	0	0	0	0	0	0	0	0	0	0	0	0	0	0	0	0	0	0	0	0	0	0	0	0	0.000	0.000	0.000	0.000	0.000	0.000
8	2	1	Cy5/Cy3 labeled biotin-BSA marker proteins	n/a	14253	11097	400	10794	10603	736	10280	10331	605	32	12	0	0	0	0	0	0	0	0	0	0	0	0	0	0	0	0	0	0	0	0	0	0	0	0	0	0	0	0	0.000	0.000	0.000	0.000	0.000	0.000
8	3	1	empty	empty	14851	11097	400	10538	10451	844	9766	9849	366	64	52	0	0	0	0	0	0	0	0	0	0	0	0	0	0	0	0	0	0	0	0	0	0	0	0	0	0	0	0	0.000	0.000	0.000	0.000	0.000	0.000
8	4	1	empty	empty	15448	11097	400	9766	9830	1109	10024	9921	426	30	17	0	0	0	0	0	0	0	0	0	0	0	0	0	0	0	0	0	0	0	0	0	0	0	0	0	0	0	0	0.000	0.000	0.000	0.000	0.000	0.000
8	5	1	empty	empty	16046	11097	400	9766	9745	591	9510	9449	645	29	1	0	0	0	0	0	0	0	0	0	0	0	0	0	0	0	0	0	0	0	0	0	0	0	0	0	0	0	0	0.000	0.000	0.000	0.000	0.000	0.000
8	6	1	empty	empty	16643	11097	400	10024	10182	960	9766	9727	679	24	14	0	0	0	0	0	0	0	0	0	0	0	0	0	0	0	0	0	0	0	0	0	0	0	0	0	0	0	0	0.000	0.000	0.000	0.000	0.000	0.000
8	1	2	BCCP-Myc tag	n/a	13656	11851	400	11052	11183	802	10280	10321	884	49	20	0	0	0	0	0	0	0	0	0	0	0	0	0	0	0	0	0	0	0	0	0	0	0	0	0	0	0	0	0.000	0.000	0.000	0.000	0.000	0.000
8	2	2	BCCP-Myc tag	n/a	14253	11851	400	10794	11573	2284	10794	10728	674	43	32	0	0	0	0	0	0	0	0	0	0	0	0	0	0	0	0	0	0	0	0	0	0	0	0	0	0	0	0	0.000	0.000	0.000	0.000	0.000	0.000
8	3	2	BCCP-Myc tag	n/a	14851	11851	400	10024	9927	394	10024	10197	560	4	0	0	0	0	0	0	0	0	0	0	0	0	0	0	0	0	0	0	0	0	0	0	0	0	0	0	0	0	0	0.000	0.000	0.000	0.000	0.000	0.000
8	4	2	BCCP-Myc tag	n/a	15448	11851	400	10538	10338	584	10280	10250	536	17	1	0	0	0	0	0	0	0	0	0	0	0	0	0	0	0	0	0	0	0	0	0	0	0	0	0	0	0	0	0.000	0.000	0.000	0.000	0.000	0.000
8	5	2	MAP kinase-interacting serine/threonine kinase 1	P000069	16046	11851	400	10794	10739	969	9766	9712	783	54	25	0	0	0	0	0	0	0	0	0	0	0	0	0	0	0	0	0	0	0	0	0	0	0	0	0	0	0	0	0.000	0.000	0.000	0.000	0.000	0.000
8	6	2	MAP kinase-interacting serine/threonine kinase 1	P000069	16643	11851	400	12080	11863	1263	10024	9855	655	80	68	0	0	0	0	0	0	0	0	0	0	0	0	0	0	0	0	0	0	0	0	0	0	0	0	0	0	0	0	0.000	0.000	0.000	0.000	0.000	0.000
8	1	3	MAP kinase-interacting serine/threonine kinase 1	P000069	13656	12604	400	14650	14532	2263	10280	10549	1067	94	72	0	0	0	0	0	0	0	0	0	0	0	0	0	0	0	0	0	0	0	0	0	0	0	0	0	0	0	0	0.000	0.000	0.000	0.000	0.000	0.000
8	2	3	MAP kinase-interacting serine/threonine kinase 1	P000069	14253	12604	400	15934	15483	1569	10538	10391	594	98	96	0	0	0	0	0	0	0	0	0	0	0	0	0	0	0	0	0	0	0	0	0	0	0	0	0	0	0	0	0.000	0.000	0.000	0.000	0.000	0.000
8	3	3	catenin (cadherin-associated protein); beta 1; 88kDa	P000251	14851	12604	400	12594	12100	1606	10280	10354	565	71	65	0	0	0	0	0	0	0	0	0	0	0	0	0	0	0	0	0	0	0	0	0	0	0	0	0	0	0	0	0.000	0.000	0.000	0.000	0.000	0.000
8	4	3	catenin (cadherin-associated protein); beta 1; 88kDa	P000251	15448	12604	400	11308	11098	1241	10794	11133	2267	4	0	0	0	0	0	0	0	0	0	0	0	0	0	0	0	0	0	0	0	0	0	0	0	0	0	0	0	0	0	0.000	0.000	0.000	0.000	0.000	0.000
8	5	3	catenin (cadherin-associated protein); beta 1; 88kDa	P000251	16046	12604	400	10794	10863	722	9766	9727	1004	59	12	0	0	0	0	0	0	0	0	0	0	0	0	0	0	0	0	0	0	0	0	0	0	0	0	0	0	0	0	0.000	0.000	0.000	0.000	0.000	0.000
8	6	3	catenin (cadherin-associated protein); beta 1; 88kDa	P000251	16643	12604	400	10538	10733	885	10024	10038	683	50	24	0	0	0	0	0	0	0	0	0	0	0	0	0	0	0	0	0	0	0	0	0	0	0	0	0	0	0	0	0.000	0.000	0.000	0.000	0.000	0.000
8	1	4	suppressor of cytokine signaling 5	P000353	13656	13358	400	12080	12221	1115	11566	11448	621	43	30	0	0	0	0	0	0	0	0	0	0	0	0	0	0	0	0	0	0	0	0	0	0	0	0	0	0	0	0	0.000	0.000	0.000	0.000	0.000	0.000
8	2	4	suppressor of cytokine signaling 5	P000353	14253	13358	400	11822	11831	640	11052	11013	738	53	18	0	0	0	0	0	0	0	0	0	0	0	0	0	0	0	0	0	0	0	0	0	0	0	0	0	0	0	0	0.000	0.000	0.000	0.000	0.000	0.000
8	3	4	suppressor of cytokine signaling 5	P000353	14851	13358	400	10794	10723	1013	11052	11076	1045	7	0	0	0	0	0	0	0	0	0	0	0	0	0	0	0	0	0	0	0	0	0	0	0	0	0	0	0	0	0	0.000	0.000	0.000	0.000	0.000	0.000
8	4	4	suppressor of cytokine signaling 5	P000353	15448	13358	400	10280	10426	836	10794	11548	3152	0	0	0	0	0	0	0	0	0	0	0	0	0	0	0	0	0	0	0	0	0	0	0	0	0	0	0	0	0	0	0.000	0.000	0.000	0.000	0.000	0.000
8	5	4	eukaryotic translation initiation factor 4E binding protein 1	P000465	16046	13358	400	9766	9979	586	10024	10001	704	15	1	0	0	0	0	0	0	0	0	0	0	0	0	0	0	0	0	0	0	0	0	0	0	0	0	0	0	0	0	0.000	0.000	0.000	0.000	0.000	0.000
8	6	4	eukaryotic translation initiation factor 4E binding protein 1	P000465	16643	13358	400	10024	10136	898	9510	9682	631	38	19	0	0	0	0	0	0	0	0	0	0	0	0	0	0	0	0	0	0	0	0	0	0	0	0	0	0	0	0	0.000	0.000	0.000	0.000	0.000	0.000
8	1	5	eukaryotic translation initiation factor 4E binding protein 1	P000465	13656	14111	400	12336	12409	814	11822	11809	1202	25	2	0	0	0	0	0	0	0	0	0	0	0	0	0	0	0	0	0	0	0	0	0	0	0	0	0	0	0	0	0.000	0.000	0.000	0.000	0.000	0.000
8	2	5	eukaryotic translation initiation factor 4E binding protein 1	P000465	14253	14111	400	12594	12694	927	11566	11506	1476	36	2	0	0	0	0	0	0	0	0	0	0	0	0	0	0	0	0	0	0	0	0	0	0	0	0	0	0	0	0	0.000	0.000	0.000	0.000	0.000	0.000
8	3	5	cell division cycle 25C; transcript variant 1	P000564	14851	14111	400	12594	12576	752	11052	11100	774	82	45	0	0	0	0	0	0	0	0	0	0	0	0	0	0	0	0	0	0	0	0	0	0	0	0	0	0	0	0	0.000	0.000	0.000	0.000	0.000	0.000
8	4	5	cell division cycle 25C; transcript variant 1	P000564	15448	14111	400	11308	11263	532	10794	10867	778	22	2	0	0	0	0	0	0	0	0	0	0	0	0	0	0	0	0	0	0	0	0	0	0	0	0	0	0	0	0	0.000	0.000	0.000	0.000	0.000	0.000
8	5	5	cell division cycle 25C; transcript variant 1	P000564	16046	14111	400	10794	10804	767	10280	10198	699	40	14	0	0	0	0	0	0	0	0	0	0	0	0	0	0	0	0	0	0	0	0	0	0	0	0	0	0	0	0	0.000	0.000	0.000	0.000	0.000	0.000
8	6	5	cell division cycle 25C; transcript variant 1	P000564	16643	14111	400	11308	11130	861	9766	9999	887	71	35	0	0	0	0	0	0	0	0	0	0	0	0	0	0	0	0	0	0	0	0	0	0	0	0	0	0	0	0	0.000	0.000	0.000	0.000	0.000	0.000
9	1	1	Cy5/Cy3 labeled biotin-BSA marker proteins	n/a	2706	14756	400	11822	12252	1155	11566	11608	1000	25	14	0	0	0	0	0	0	0	0	0	0	0	0	0	0	0	0	0	0	0	0	0	0	0	0	0	0	0	0	0.000	0.000	0.000	0.000	0.000	0.000
9	2	1	Cy5/Cy3 labeled biotin-BSA marker proteins	n/a	3303	14756	400	11566	11482	572	11566	12663	5040	0	0	0	0	0	0	0	0	0	0	0	0	0	0	0	0	0	0	0	0	0	0	0	0	0	0	0	0	0	0	0.000	0.000	0.000	0.000	0.000	0.000
9	3	1	empty	empty	3901	14756	400	11308	11248	711	11566	14738	10020	0	0	0	0	0	0	0	0	0	0	0	0	0	0	0	0	0	0	0	0	0	0	0	0	0	0	0	0	0	0	0.000	0.000	0.000	0.000	0.000	0.000
9	4	1	empty	empty	4498	14756	400	11308	11321	696	11052	11041	904	22	0	0	0	0	0	0	0	0	0	0	0	0	0	0	0	0	0	0	0	0	0	0	0	0	0	0	0	0	0	0.000	0.000	0.000	0.000	0.000	0.000
9	5	1	empty	empty	5096	14756	400	12080	11974	693	11308	11577	1315	10	0	0	0	0	0	0	0	0	0	0	0	0	0	0	0	0	0	0	0	0	0	0	0	0	0	0	0	0	0	0.000	0.000	0.000	0.000	0.000	0.000
9	6	1	empty	empty	5693	14756	400	10794	10922	698	11566	11549	898	3	0	0	0	0	0	0	0	0	0	0	0	0	0	0	0	0	0	0	0	0	0	0	0	0	0	0	0	0	0	0.000	0.000	0.000	0.000	0.000	0.000
9	1	2	v-akt murine thymoma viral oncogene homolog 1	P000050	2706	15510	400	18504	17690	2073	11308	11710	991	100	97	0	0	0	0	0	0	0	0	0	0	0	0	0	0	0	0	0	0	0	0	0	0	0	0	0	0	0	0	0.000	0.000	0.000	0.000	0.000	0.000
9	2	2	v-akt murine thymoma viral oncogene homolog 1	P000050	3303	15510	400	17476	17402	1784	11566	11654	736	100	100	0	0	0	0	0	0	0	0	0	0	0	0	0	0	0	0	0	0	0	0	0	0	0	0	0	0	0	0	0.000	0.000	0.000	0.000	0.000	0.000
9	3	2	v-akt murine thymoma viral oncogene homolog 1	P000050	3901	15510	400	17476	17314	1808	11052	11542	1552	100	93	0	0	0	0	0	0	0	0	0	0	0	0	0	0	0	0	0	0	0	0	0	0	0	0	0	0	0	0	0.000	0.000	0.000	0.000	0.000	0.000
9	4	2	v-akt murine thymoma viral oncogene homolog 1	P000050	4498	15510	400	17476	17063	1685	11052	11023	701	100	99	0	0	0	0	0	0	0	0	0	0	0	0	0	0	0	0	0	0	0	0	0	0	0	0	0	0	0	0	0.000	0.000	0.000	0.000	0.000	0.000
9	5	2	BCL2-antagonist of cell death; transcript variant 1	P000165	5096	15510	400	17734	17484	1772	11052	11042	728	100	100	0	0	0	0	0	0	0	0	0	0	0	0	0	0	0	0	0	0	0	0	0	0	0	0	0	0	0	0	0.000	0.000	0.000	0.000	0.000	0.000
9	6	2	BCL2-antagonist of cell death; transcript variant 1	P000165	5693	15510	400	19018	18790	1797	11052	11152	787	100	100	0	0	0	0	0	0	0	0	0	0	0	0	0	0	0	0	0	0	0	0	0	0	0	0	0	0	0	0	0.000	0.000	0.000	0.000	0.000	0.000
9	1	3	BCL2-antagonist of cell death; transcript variant 1	P000165	2706	16263	400	20304	19955	2066	11566	11728	651	100	100	0	0	0	0	0	0	0	0	0	0	0	0	0	0	0	0	0	0	0	0	0	0	0	0	0	0	0	0	0.000	0.000	0.000	0.000	0.000	0.000
9	2	3	BCL2-antagonist of cell death; transcript variant 1	P000165	3303	16263	400	21074	22891	5725	11822	11813	720	100	100	0	0	0	0	0	0	0	0	0	0	0	0	0	0	0	0	0	0	0	0	0	0	0	0	0	0	0	0	0.000	0.000	0.000	0.000	0.000	0.000
9	3	3	MADS box transcription enhancer factor 2; polypeptide C (myocyte enhancer factor 2C)	P000335	3901	16263	400	15420	15445	1562	11566	11657	748	98	95	0	0	0	0	0	0	0	0	0	0	0	0	0	0	0	0	0	0	0	0	0	0	0	0	0	0	0	0	0.000	0.000	0.000	0.000	0.000	0.000
9	4	3	MADS box transcription enhancer factor 2; polypeptide C (myocyte enhancer factor 2C)	P000335	4498	16263	400	14136	14207	734	11566	11618	923	99	81	0	0	0	0	0	0	0	0	0	0	0	0	0	0	0	0	0	0	0	0	0	0	0	0	0	0	0	0	0.000	0.000	0.000	0.000	0.000	0.000
9	5	3	MADS box transcription enhancer factor 2; polypeptide C (myocyte enhancer factor 2C)	P000335	5096	16263	400	13622	13478	857	11308	11279	672	95	77	0	0	0	0	0	0	0	0	0	0	0	0	0	0	0	0	0	0	0	0	0	0	0	0	0	0	0	0	0.000	0.000	0.000	0.000	0.000	0.000
9	6	3	MADS box transcription enhancer factor 2; polypeptide C (myocyte enhancer factor 2C)	P000335	5693	16263	400	15420	15520	2154	11308	11577	1085	93	83	0	0	0	0	0	0	0	0	0	0	0	0	0	0	0	0	0	0	0	0	0	0	0	0	0	0	0	0	0.000	0.000	0.000	0.000	0.000	0.000
9	1	4	caspase 9; apoptosis-related cysteine protease; transcript variant alpha	P000438	2706	17017	400	13364	13148	899	12080	12079	1010	64	17	0	0	0	0	0	0	0	0	0	0	0	0	0	0	0	0	0	0	0	0	0	0	0	0	0	0	0	0	0.000	0.000	0.000	0.000	0.000	0.000
9	2	4	caspase 9; apoptosis-related cysteine protease; transcript variant alpha	P000438	3303	17017	400	12850	12654	689	11566	11694	1034	54	1	0	0	0	0	0	0	0	0	0	0	0	0	0	0	0	0	0	0	0	0	0	0	0	0	0	0	0	0	0.000	0.000	0.000	0.000	0.000	0.000
9	3	4	caspase 9; apoptosis-related cysteine protease; transcript variant alpha	P000438	3901	17017	400	13108	14031	2129	11822	11923	984	69	36	0	0	0	0	0	0	0	0	0	0	0	0	0	0	0	0	0	0	0	0	0	0	0	0	0	0	0	0	0.000	0.000	0.000	0.000	0.000	0.000
9	4	4	caspase 9; apoptosis-related cysteine protease; transcript variant alpha	P000438	4498	17017	400	12336	12513	1192	11566	11581	1114	35	16	0	0	0	0	0	0	0	0	0	0	0	0	0	0	0	0	0	0	0	0	0	0	0	0	0	0	0	0	0.000	0.000	0.000	0.000	0.000	0.000
9	5	4	nuclear receptor subfamily 4; group A; member 2; transcript variant 1	P000537	5096	17017	400	12594	12783	945	11566	11870	1173	46	9	0	0	0	0	0	0	0	0	0	0	0	0	0	0	0	0	0	0	0	0	0	0	0	0	0	0	0	0	0.000	0.000	0.000	0.000	0.000	0.000
9	6	4	nuclear receptor subfamily 4; group A; member 2; transcript variant 1	P000537	5693	17017	400	13108	13146	851	11822	11918	854	71	23	0	0	0	0	0	0	0	0	0	0	0	0	0	0	0	0	0	0	0	0	0	0	0	0	0	0	0	0	0.000	0.000	0.000	0.000	0.000	0.000
9	1	5	nuclear receptor subfamily 4; group A; member 2; transcript variant 1	P000537	2706	17770	400	14136	14190	1027	11566	11715	1058	93	68	0	0	0	0	0	0	0	0	0	0	0	0	0	0	0	0	0	0	0	0	0	0	0	0	0	0	0	0	0.000	0.000	0.000	0.000	0.000	0.000
9	2	5	nuclear receptor subfamily 4; group A; member 2; transcript variant 1	P000537	3303	17770	400	13364	13375	1077	12080	12969	2945	10	0	0	0	0	0	0	0	0	0	0	0	0	0	0	0	0	0	0	0	0	0	0	0	0	0	0	0	0	0	0.000	0.000	0.000	0.000	0.000	0.000
9	3	5	Buffer	n/a	3901	17770	400	12080	13303	3102	12080	12106	1034	33	27	0	0	0	0	0	0	0	0	0	0	0	0	0	0	0	0	0	0	0	0	0	0	0	0	0	0	0	0	0.000	0.000	0.000	0.000	0.000	0.000
9	4	5	Buffer	n/a	4498	17770	400	12080	12243	888	12080	12232	837	15	8	0	0	0	0	0	0	0	0	0	0	0	0	0	0	0	0	0	0	0	0	0	0	0	0	0	0	0	0	0.000	0.000	0.000	0.000	0.000	0.000
9	5	5	Buffer	n/a	5096	17770	400	11308	11533	845	11566	11671	730	25	4	0	0	0	0	0	0	0	0	0	0	0	0	0	0	0	0	0	0	0	0	0	0	0	0	0	0	0	0	0.000	0.000	0.000	0.000	0.000	0.000
9	6	5	Buffer	n/a	5693	17770	400	11308	11363	611	12336	12591	892	1	0	0	0	0	0	0	0	0	0	0	0	0	0	0	0	0	0	0	0	0	0	0	0	0	0	0	0	0	0	0.000	0.000	0.000	0.000	0.000	0.000
10	1	1	BCCP-Myc3	n/a	6314	14805	400	12850	12875	776	11052	11117	489	95	87	0	0	0	0	0	0	0	0	0	0	0	0	0	0	0	0	0	0	0	0	0	0	0	0	0	0	0	0	0.000	0.000	0.000	0.000	0.000	0.000
10	2	1	BCCP-Myc3	n/a	6911	14805	400	12594	12584	544	11566	11660	1356	28	0	0	0	0	0	0	0	0	0	0	0	0	0	0	0	0	0	0	0	0	0	0	0	0	0	0	0	0	0	0.000	0.000	0.000	0.000	0.000	0.000
10	3	1	empty	empty	7509	14805	400	12336	12603	1044	11822	11791	1221	18	8	0	0	0	0	0	0	0	0	0	0	0	0	0	0	0	0	0	0	0	0	0	0	0	0	0	0	0	0	0.000	0.000	0.000	0.000	0.000	0.000
10	4	1	empty	empty	8106	14805	400	12080	11958	948	12080	12211	763	16	2	0	0	0	0	0	0	0	0	0	0	0	0	0	0	0	0	0	0	0	0	0	0	0	0	0	0	0	0	0.000	0.000	0.000	0.000	0.000	0.000
10	5	1	empty	empty	8704	14805	400	11822	11869	497	11822	11939	612	16	0	0	0	0	0	0	0	0	0	0	0	0	0	0	0	0	0	0	0	0	0	0	0	0	0	0	0	0	0	0.000	0.000	0.000	0.000	0.000	0.000
10	6	1	empty	empty	9301	14805	400	12080	11906	823	12080	12100	617	14	5	0	0	0	0	0	0	0	0	0	0	0	0	0	0	0	0	0	0	0	0	0	0	0	0	0	0	0	0	0.000	0.000	0.000	0.000	0.000	0.000
10	1	2	mitogen-activated protein kinase 11	P000027	6314	15559	400	12594	12678	625	11308	11497	583	86	62	0	0	0	0	0	0	0	0	0	0	0	0	0	0	0	0	0	0	0	0	0	0	0	0	0	0	0	0	0.000	0.000	0.000	0.000	0.000	0.000
10	2	2	mitogen-activated protein kinase 11	P000027	6911	15559	400	13622	14709	4478	12080	12690	1811	33	12	0	0	0	0	0	0	0	0	0	0	0	0	0	0	0	0	0	0	0	0	0	0	0	0	0	0	0	0	0.000	0.000	0.000	0.000	0.000	0.000
10	3	2	mitogen-activated protein kinase 11	P000027	7509	15559	400	13878	13732	718	12080	12128	900	82	42	0	0	0	0	0	0	0	0	0	0	0	0	0	0	0	0	0	0	0	0	0	0	0	0	0	0	0	0	0.000	0.000	0.000	0.000	0.000	0.000
10	4	2	mitogen-activated protein kinase 11	P000027	8106	15559	400	13364	13902	1756	12080	12018	660	80	50	0	0	0	0	0	0	0	0	0	0	0	0	0	0	0	0	0	0	0	0	0	0	0	0	0	0	0	0	0.000	0.000	0.000	0.000	0.000	0.000
10	5	2	signal transducer and activator of transcription 5A	P000114	8704	15559	400	13878	13736	1144	11822	11781	670	85	74	0	0	0	0	0	0	0	0	0	0	0	0	0	0	0	0	0	0	0	0	0	0	0	0	0	0	0	0	0.000	0.000	0.000	0.000	0.000	0.000
10	6	2	signal transducer and activator of transcription 5A	P000114	9301	15559	400	13622	13594	864	12080	11944	775	75	42	0	0	0	0	0	0	0	0	0	0	0	0	0	0	0	0	0	0	0	0	0	0	0	0	0	0	0	0	0.000	0.000	0.000	0.000	0.000	0.000
10	1	3	signal transducer and activator of transcription 5A	P000114	6314	16312	400	12850	12720	704	11052	11191	576	90	78	0	0	0	0	0	0	0	0	0	0	0	0	0	0	0	0	0	0	0	0	0	0	0	0	0	0	0	0	0.000	0.000	0.000	0.000	0.000	0.000
10	2	3	signal transducer and activator of transcription 5A	P000114	6911	16312	400	14136	13904	965	11822	12046	1222	80	40	0	0	0	0	0	0	0	0	0	0	0	0	0	0	0	0	0	0	0	0	0	0	0	0	0	0	0	0	0.000	0.000	0.000	0.000	0.000	0.000
10	3	3	BCL2-related protein A1	P000314	7509	16312	400	13878	13946	890	12080	12230	646	93	67	0	0	0	0	0	0	0	0	0	0	0	0	0	0	0	0	0	0	0	0	0	0	0	0	0	0	0	0	0.000	0.000	0.000	0.000	0.000	0.000
10	4	3	BCL2-related protein A1	P000314	8106	16312	400	14650	15424	2307	12336	12550	1834	63	29	0	0	0	0	0	0	0	0	0	0	0	0	0	0	0	0	0	0	0	0	0	0	0	0	0	0	0	0	0.000	0.000	0.000	0.000	0.000	0.000
10	5	3	BCL2-related protein A1	P000314	8704	16312	400	13622	13589	689	12336	12756	2468	2	0	0	0	0	0	0	0	0	0	0	0	0	0	0	0	0	0	0	0	0	0	0	0	0	0	0	0	0	0	0.000	0.000	0.000	0.000	0.000	0.000
10	6	3	BCL2-related protein A1	P000314	9301	16312	400	13622	13732	1041	12336	13778	3738	4	0	0	0	0	0	0	0	0	0	0	0	0	0	0	0	0	0	0	0	0	0	0	0	0	0	0	0	0	0	0.000	0.000	0.000	0.000	0.000	0.000
10	1	4	Fas (TNFRSF6)-associated via death domain	P000417	6314	17066	400	13622	13688	803	11822	11978	794	88	56	0	0	0	0	0	0	0	0	0	0	0	0	0	0	0	0	0	0	0	0	0	0	0	0	0	0	0	0	0.000	0.000	0.000	0.000	0.000	0.000
10	2	4	Fas (TNFRSF6)-associated via death domain	P000417	6911	17066	400	13364	13413	619	12080	12062	619	86	68	0	0	0	0	0	0	0	0	0	0	0	0	0	0	0	0	0	0	0	0	0	0	0	0	0	0	0	0	0.000	0.000	0.000	0.000	0.000	0.000
10	3	4	Fas (TNFRSF6)-associated via death domain	P000417	7509	17066	400	13878	13625	1174	12850	12606	748	58	35	0	0	0	0	0	0	0	0	0	0	0	0	0	0	0	0	0	0	0	0	0	0	0	0	0	0	0	0	0.000	0.000	0.000	0.000	0.000	0.000
10	4	4	Fas (TNFRSF6)-associated via death domain	P000417	8106	17066	400	13622	13602	882	12594	12673	1739	20	0	0	0	0	0	0	0	0	0	0	0	0	0	0	0	0	0	0	0	0	0	0	0	0	0	0	0	0	0	0.000	0.000	0.000	0.000	0.000	0.000
10	5	4	interleukin 18 (interferon-gamma-inducing factor)	P000513	8704	17066	400	12850	12784	864	12594	13519	3347	0	0	0	0	0	0	0	0	0	0	0	0	0	0	0	0	0	0	0	0	0	0	0	0	0	0	0	0	0	0	0.000	0.000	0.000	0.000	0.000	0.000
10	6	4	interleukin 18 (interferon-gamma-inducing factor)	P000513	9301	17066	400	13622	13756	1088	13108	13540	2391	7	0	0	0	0	0	0	0	0	0	0	0	0	0	0	0	0	0	0	0	0	0	0	0	0	0	0	0	0	0	0.000	0.000	0.000	0.000	0.000	0.000
10	1	5	interleukin 18 (interferon-gamma-inducing factor)	P000513	6314	17819	400	13364	13206	810	12594	12683	826	39	9	0	0	0	0	0	0	0	0	0	0	0	0	0	0	0	0	0	0	0	0	0	0	0	0	0	0	0	0	0.000	0.000	0.000	0.000	0.000	0.000
10	2	5	interleukin 18 (interferon-gamma-inducing factor)	P000513	6911	17819	400	13364	13513	936	12594	12422	668	59	28	0	0	0	0	0	0	0	0	0	0	0	0	0	0	0	0	0	0	0	0	0	0	0	0	0	0	0	0	0.000	0.000	0.000	0.000	0.000	0.000
10	3	5	serine/threonine kinase 38	P001100	7509	17819	400	14392	14126	1103	12850	12962	620	67	56	0	0	0	0	0	0	0	0	0	0	0	0	0	0	0	0	0	0	0	0	0	0	0	0	0	0	0	0	0.000	0.000	0.000	0.000	0.000	0.000
10	4	5	serine/threonine kinase 38	P001100	8106	17819	400	14136	13953	903	12594	12556	663	74	51	0	0	0	0	0	0	0	0	0	0	0	0	0	0	0	0	0	0	0	0	0	0	0	0	0	0	0	0	0.000	0.000	0.000	0.000	0.000	0.000
10	5	5	serine/threonine kinase 38	P001100	8704	17819	400	13878	13828	1267	12594	12510	682	62	45	0	0	0	0	0	0	0	0	0	0	0	0	0	0	0	0	0	0	0	0	0	0	0	0	0	0	0	0	0.000	0.000	0.000	0.000	0.000	0.000
10	6	5	serine/threonine kinase 38	P001100	9301	17819	400	13364	14378	2393	12080	11960	776	64	46	0	0	0	0	0	0	0	0	0	0	0	0	0	0	0	0	0	0	0	0	0	0	0	0	0	0	0	0	0.000	0.000	0.000	0.000	0.000	0.000
11	1	1	Phosphopeptide3	empty	9924	14731	400	11822	11872	750	12336	12689	1489	0	0	0	0	0	0	0	0	0	0	0	0	0	0	0	0	0	0	0	0	0	0	0	0	0	0	0	0	0	0	0.000	0.000	0.000	0.000	0.000	0.000
11	2	1	Phosphopeptide3	empty	10521	14731	400	12594	13014	1121	12336	12255	654	33	17	0	0	0	0	0	0	0	0	0	0	0	0	0	0	0	0	0	0	0	0	0	0	0	0	0	0	0	0	0.000	0.000	0.000	0.000	0.000	0.000
11	3	1	empty	empty	11119	14731	400	11822	11838	687	11308	11355	640	45	21	0	0	0	0	0	0	0	0	0	0	0	0	0	0	0	0	0	0	0	0	0	0	0	0	0	0	0	0	0.000	0.000	0.000	0.000	0.000	0.000
11	4	1	empty	empty	11716	14731	400	12336	12353	1207	11308	11303	827	50	28	0	0	0	0	0	0	0	0	0	0	0	0	0	0	0	0	0	0	0	0	0	0	0	0	0	0	0	0	0.000	0.000	0.000	0.000	0.000	0.000
11	5	1	empty	empty	12314	14731	400	11052	10978	884	11566	11617	857	7	0	0	0	0	0	0	0	0	0	0	0	0	0	0	0	0	0	0	0	0	0	0	0	0	0	0	0	0	0	0.000	0.000	0.000	0.000	0.000	0.000
11	6	1	empty	empty	12911	14731	400	11566	11493	662	12336	13098	2166	0	0	0	0	0	0	0	0	0	0	0	0	0	0	0	0	0	0	0	0	0	0	0	0	0	0	0	0	0	0	0.000	0.000	0.000	0.000	0.000	0.000
11	1	2	serine/threonine kinase 3 (STE20 homolog; yeast)	P000007	9924	15485	400	13364	13474	949	12080	12075	823	71	34	0	0	0	0	0	0	0	0	0	0	0	0	0	0	0	0	0	0	0	0	0	0	0	0	0	0	0	0	0.000	0.000	0.000	0.000	0.000	0.000
11	2	2	serine/threonine kinase 3 (STE20 homolog; yeast)	P000007	10521	15485	400	12850	13026	1119	11822	11962	867	51	29	0	0	0	0	0	0	0	0	0	0	0	0	0	0	0	0	0	0	0	0	0	0	0	0	0	0	0	0	0.000	0.000	0.000	0.000	0.000	0.000
11	3	2	serine/threonine kinase 3 (STE20 homolog; yeast)	P000007	11119	15485	400	12850	12775	1017	11052	11039	773	81	50	0	0	0	0	0	0	0	0	0	0	0	0	0	0	0	0	0	0	0	0	0	0	0	0	0	0	0	0	0.000	0.000	0.000	0.000	0.000	0.000
11	4	2	serine/threonine kinase 3 (STE20 homolog; yeast)	P000007	11716	15485	400	13364	13308	1047	11052	11256	1167	87	45	0	0	0	0	0	0	0	0	0	0	0	0	0	0	0	0	0	0	0	0	0	0	0	0	0	0	0	0	0.000	0.000	0.000	0.000	0.000	0.000
11	5	2	v-src sarcoma (Schmidt-Ruppin A-2) viral oncogene homolog (avian)	P000089	12314	15485	400	12336	12149	1189	11308	11637	1878	15	0	0	0	0	0	0	0	0	0	0	0	0	0	0	0	0	0	0	0	0	0	0	0	0	0	0	0	0	0	0.000	0.000	0.000	0.000	0.000	0.000
11	6	2	v-src sarcoma (Schmidt-Ruppin A-2) viral oncogene homolog (avian)	P000089	12911	15485	400	12336	12307	1083	11052	11484	1609	29	4	0	0	0	0	0	0	0	0	0	0	0	0	0	0	0	0	0	0	0	0	0	0	0	0	0	0	0	0	0.000	0.000	0.000	0.000	0.000	0.000
11	1	3	v-src sarcoma (Schmidt-Ruppin A-2) viral oncogene homolog (avian)	P000089	9924	16238	400	13622	14142	1579	11822	11861	820	82	60	0	0	0	0	0	0	0	0	0	0	0	0	0	0	0	0	0	0	0	0	0	0	0	0	0	0	0	0	0.000	0.000	0.000	0.000	0.000	0.000
11	2	3	v-src sarcoma (Schmidt-Ruppin A-2) viral oncogene homolog (avian)	P000089	10521	16238	400	12594	13323	2102	11822	11846	571	51	37	0	0	0	0	0	0	0	0	0	0	0	0	0	0	0	0	0	0	0	0	0	0	0	0	0	0	0	0	0.000	0.000	0.000	0.000	0.000	0.000
11	3	3	activating transcription factor 4 (tax-responsive enhancer element B67)	P000299	11119	16238	400	12336	12354	735	11308	11355	945	57	13	0	0	0	0	0	0	0	0	0	0	0	0	0	0	0	0	0	0	0	0	0	0	0	0	0	0	0	0	0.000	0.000	0.000	0.000	0.000	0.000
11	4	3	activating transcription factor 4 (tax-responsive enhancer element B67)	P000299	11716	16238	400	13622	13758	1840	10794	10791	681	93	77	0	0	0	0	0	0	0	0	0	0	0	0	0	0	0	0	0	0	0	0	0	0	0	0	0	0	0	0	0.000	0.000	0.000	0.000	0.000	0.000
11	5	3	activating transcription factor 4 (tax-responsive enhancer element B67)	P000299	12314	16238	400	12594	12663	720	11308	11196	608	82	64	0	0	0	0	0	0	0	0	0	0	0	0	0	0	0	0	0	0	0	0	0	0	0	0	0	0	0	0	0.000	0.000	0.000	0.000	0.000	0.000
11	6	3	activating transcription factor 4 (tax-responsive enhancer element B67)	P000299	12911	16238	400	13108	13329	2084	11052	11053	526	87	77	0	0	0	0	0	0	0	0	0	0	0	0	0	0	0	0	0	0	0	0	0	0	0	0	0	0	0	0	0.000	0.000	0.000	0.000	0.000	0.000
11	1	4	cytokine inducible SH2-containing protein; transcript variant 2	P000383	9924	16992	400	12336	12503	623	11822	11946	696	46	14	0	0	0	0	0	0	0	0	0	0	0	0	0	0	0	0	0	0	0	0	0	0	0	0	0	0	0	0	0.000	0.000	0.000	0.000	0.000	0.000
11	2	4	cytokine inducible SH2-containing protein; transcript variant 2	P000383	10521	16992	400	12594	13246	2351	11822	11764	577	52	40	0	0	0	0	0	0	0	0	0	0	0	0	0	0	0	0	0	0	0	0	0	0	0	0	0	0	0	0	0.000	0.000	0.000	0.000	0.000	0.000
11	3	4	cytokine inducible SH2-containing protein; transcript variant 2	P000383	11119	16992	400	12336	12471	774	11308	11300	724	71	38	0	0	0	0	0	0	0	0	0	0	0	0	0	0	0	0	0	0	0	0	0	0	0	0	0	0	0	0	0.000	0.000	0.000	0.000	0.000	0.000
11	4	4	cytokine inducible SH2-containing protein; transcript variant 2	P000383	11716	16992	400	11822	11886	1149	11566	12257	2133	3	1	0	0	0	0	0	0	0	0	0	0	0	0	0	0	0	0	0	0	0	0	0	0	0	0	0	0	0	0	0.000	0.000	0.000	0.000	0.000	0.000
11	5	4	baculoviral IAP repeat-containing 5 (survivin)	P000489	12314	16992	400	12850	13004	1142	10794	10979	651	88	71	0	0	0	0	0	0	0	0	0	0	0	0	0	0	0	0	0	0	0	0	0	0	0	0	0	0	0	0	0.000	0.000	0.000	0.000	0.000	0.000
11	6	4	baculoviral IAP repeat-containing 5 (survivin)	P000489	12911	16992	400	13364	13343	1469	11052	10836	911	79	59	0	0	0	0	0	0	0	0	0	0	0	0	0	0	0	0	0	0	0	0	0	0	0	0	0	0	0	0	0.000	0.000	0.000	0.000	0.000	0.000
11	1	5	baculoviral IAP repeat-containing 5 (survivin)	P000489	9924	17745	400	12850	13044	859	12080	12718	2141	9	0	0	0	0	0	0	0	0	0	0	0	0	0	0	0	0	0	0	0	0	0	0	0	0	0	0	0	0	0	0.000	0.000	0.000	0.000	0.000	0.000
11	2	5	baculoviral IAP repeat-containing 5 (survivin)	P000489	10521	17745	400	12850	13091	1003	11308	11660	1394	56	22	0	0	0	0	0	0	0	0	0	0	0	0	0	0	0	0	0	0	0	0	0	0	0	0	0	0	0	0	0.000	0.000	0.000	0.000	0.000	0.000
11	3	5	PR domain containing 4	P000713	11119	17745	400	14650	14736	927	11052	10963	716	100	100	0	0	0	0	0	0	0	0	0	0	0	0	0	0	0	0	0	0	0	0	0	0	0	0	0	0	0	0	0.000	0.000	0.000	0.000	0.000	0.000
11	4	5	PR domain containing 4	P000713	11716	17745	400	14906	14813	872	10794	11444	1832	98	68	0	0	0	0	0	0	0	0	0	0	0	0	0	0	0	0	0	0	0	0	0	0	0	0	0	0	0	0	0.000	0.000	0.000	0.000	0.000	0.000
11	5	5	PR domain containing 4	P000713	12314	17745	400	15934	15688	1462	11052	11227	672	100	96	0	0	0	0	0	0	0	0	0	0	0	0	0	0	0	0	0	0	0	0	0	0	0	0	0	0	0	0	0.000	0.000	0.000	0.000	0.000	0.000
11	6	5	PR domain containing 4	P000713	12911	17745	400	14906	14916	1079	10794	11340	1937	95	61	0	0	0	0	0	0	0	0	0	0	0	0	0	0	0	0	0	0	0	0	0	0	0	0	0	0	0	0	0.000	0.000	0.000	0.000	0.000	0.000
12	1	1	Cy5/Cy3 labeled biotin-BSA marker proteins	n/a	13632	14657	400	11308	11622	1233	11308	11361	873	34	21	0	0	0	0	0	0	0	0	0	0	0	0	0	0	0	0	0	0	0	0	0	0	0	0	0	0	0	0	0.000	0.000	0.000	0.000	0.000	0.000
12	2	1	Cy5/Cy3 labeled biotin-BSA marker proteins	n/a	14229	14657	400	11308	11319	485	11308	11268	665	9	0	0	0	0	0	0	0	0	0	0	0	0	0	0	0	0	0	0	0	0	0	0	0	0	0	0	0	0	0	0.000	0.000	0.000	0.000	0.000	0.000
12	3	1	empty	empty	14827	14657	400	11308	11268	627	11566	11403	850	1	0	0	0	0	0	0	0	0	0	0	0	0	0	0	0	0	0	0	0	0	0	0	0	0	0	0	0	0	0	0.000	0.000	0.000	0.000	0.000	0.000
12	4	1	empty	empty	15424	14657	400	11308	11500	734	11052	10896	654	35	12	0	0	0	0	0	0	0	0	0	0	0	0	0	0	0	0	0	0	0	0	0	0	0	0	0	0	0	0	0.000	0.000	0.000	0.000	0.000	0.000
12	5	1	empty	empty	16022	14657	400	11052	11238	869	10794	10576	897	29	9	0	0	0	0	0	0	0	0	0	0	0	0	0	0	0	0	0	0	0	0	0	0	0	0	0	0	0	0	0.000	0.000	0.000	0.000	0.000	0.000
12	6	1	empty	empty	16619	14657	400	10024	10052	630	9766	9933	717	22	6	0	0	0	0	0	0	0	0	0	0	0	0	0	0	0	0	0	0	0	0	0	0	0	0	0	0	0	0	0.000	0.000	0.000	0.000	0.000	0.000
12	1	2	Beta-galactosidase only (no BCCP-Myc tag)	n/a	13632	15411	400	11822	13345	3769	10794	10934	850	64	32	0	0	0	0	0	0	0	0	0	0	0	0	0	0	0	0	0	0	0	0	0	0	0	0	0	0	0	0	0.000	0.000	0.000	0.000	0.000	0.000
12	2	2	Beta-galactosidase only (no BCCP-Myc tag)	n/a	14229	15411	400	11822	11605	625	11308	11478	835	20	0	0	0	0	0	0	0	0	0	0	0	0	0	0	0	0	0	0	0	0	0	0	0	0	0	0	0	0	0	0.000	0.000	0.000	0.000	0.000	0.000
12	3	2	Beta-galactosidase only (no BCCP-Myc tag)	n/a	14827	15411	400	12080	12027	1290	11308	11249	758	51	35	0	0	0	0	0	0	0	0	0	0	0	0	0	0	0	0	0	0	0	0	0	0	0	0	0	0	0	0	0.000	0.000	0.000	0.000	0.000	0.000
12	4	2	Beta-galactosidase only (no BCCP-Myc tag)	n/a	15424	15411	400	12336	12179	820	11052	11097	734	72	40	0	0	0	0	0	0	0	0	0	0	0	0	0	0	0	0	0	0	0	0	0	0	0	0	0	0	0	0	0.000	0.000	0.000	0.000	0.000	0.000
12	5	2	serum-inducible kinase	P000073	16022	15411	400	11566	11756	1050	11052	11008	552	42	28	0	0	0	0	0	0	0	0	0	0	0	0	0	0	0	0	0	0	0	0	0	0	0	0	0	0	0	0	0.000	0.000	0.000	0.000	0.000	0.000
12	6	2	serum-inducible kinase	P000073	16619	15411	400	10280	10448	710	10280	10341	670	25	5	0	0	0	0	0	0	0	0	0	0	0	0	0	0	0	0	0	0	0	0	0	0	0	0	0	0	0	0	0.000	0.000	0.000	0.000	0.000	0.000
12	1	3	serum-inducible kinase	P000073	13632	16164	400	11566	11711	747	10794	10763	658	61	27	0	0	0	0	0	0	0	0	0	0	0	0	0	0	0	0	0	0	0	0	0	0	0	0	0	0	0	0	0.000	0.000	0.000	0.000	0.000	0.000
12	2	3	serum-inducible kinase	P000073	14229	16164	400	11308	11272	617	10794	10667	578	36	15	0	0	0	0	0	0	0	0	0	0	0	0	0	0	0	0	0	0	0	0	0	0	0	0	0	0	0	0	0.000	0.000	0.000	0.000	0.000	0.000
12	3	3	TRK-fused gene	P000254	14827	16164	400	11822	11947	1089	10666	10836	674	66	40	0	0	0	0	0	0	0	0	0	0	0	0	0	0	0	0	0	0	0	0	0	0	0	0	0	0	0	0	0.000	0.000	0.000	0.000	0.000	0.000
12	4	3	TRK-fused gene	P000254	15424	16164	400	11822	11817	626	11308	11158	690	45	6	0	0	0	0	0	0	0	0	0	0	0	0	0	0	0	0	0	0	0	0	0	0	0	0	0	0	0	0	0.000	0.000	0.000	0.000	0.000	0.000
12	5	3	TRK-fused gene	P000254	16022	16164	400	11822	11663	760	11052	11171	630	55	36	0	0	0	0	0	0	0	0	0	0	0	0	0	0	0	0	0	0	0	0	0	0	0	0	0	0	0	0	0.000	0.000	0.000	0.000	0.000	0.000
12	6	3	TRK-fused gene	P000254	16619	16164	400	11308	11139	920	11052	11436	1060	11	0	0	0	0	0	0	0	0	0	0	0	0	0	0	0	0	0	0	0	0	0	0	0	0	0	0	0	0	0	0.000	0.000	0.000	0.000	0.000	0.000
12	1	4	TNF receptor-associated factor 5; transcript variant 2	P000355	13632	16918	400	12336	12211	1248	10794	10780	857	72	44	0	0	0	0	0	0	0	0	0	0	0	0	0	0	0	0	0	0	0	0	0	0	0	0	0	0	0	0	0.000	0.000	0.000	0.000	0.000	0.000
12	2	4	TNF receptor-associated factor 5; transcript variant 2	P000355	14229	16918	400	11822	11673	732	10538	10584	458	80	60	0	0	0	0	0	0	0	0	0	0	0	0	0	0	0	0	0	0	0	0	0	0	0	0	0	0	0	0	0.000	0.000	0.000	0.000	0.000	0.000
12	3	4	TNF receptor-associated factor 5; transcript variant 2	P000355	14827	16918	400	11308	11121	570	10794	10785	535	39	1	0	0	0	0	0	0	0	0	0	0	0	0	0	0	0	0	0	0	0	0	0	0	0	0	0	0	0	0	0.000	0.000	0.000	0.000	0.000	0.000
12	4	4	TNF receptor-associated factor 5; transcript variant 2	P000355	15424	16918	400	11308	11273	468	10794	10919	649	35	3	0	0	0	0	0	0	0	0	0	0	0	0	0	0	0	0	0	0	0	0	0	0	0	0	0	0	0	0	0.000	0.000	0.000	0.000	0.000	0.000
12	5	4	dual specificity phosphatase 6; transcript variant 1	P000468	16022	16918	400	11566	11594	900	10794	10800	767	57	25	0	0	0	0	0	0	0	0	0	0	0	0	0	0	0	0	0	0	0	0	0	0	0	0	0	0	0	0	0.000	0.000	0.000	0.000	0.000	0.000
12	6	4	dual specificity phosphatase 6; transcript variant 1	P000468	16619	16918	400	12594	12620	805	10794	10916	731	96	63	0	0	0	0	0	0	0	0	0	0	0	0	0	0	0	0	0	0	0	0	0	0	0	0	0	0	0	0	0.000	0.000	0.000	0.000	0.000	0.000
12	1	5	dual specificity phosphatase 6; transcript variant 1	P000468	13632	17671	400	11822	11737	712	10666	10922	985	57	7	0	0	0	0	0	0	0	0	0	0	0	0	0	0	0	0	0	0	0	0	0	0	0	0	0	0	0	0	0.000	0.000	0.000	0.000	0.000	0.000
12	2	5	dual specificity phosphatase 6; transcript variant 1	P000468	14229	17671	400	11566	11586	858	10794	11106	1247	36	0	0	0	0	0	0	0	0	0	0	0	0	0	0	0	0	0	0	0	0	0	0	0	0	0	0	0	0	0	0.000	0.000	0.000	0.000	0.000	0.000
12	3	5	growth factor receptor-bound protein 10	P000567	14827	17671	400	12594	12438	761	10794	11048	1133	72	26	0	0	0	0	0	0	0	0	0	0	0	0	0	0	0	0	0	0	0	0	0	0	0	0	0	0	0	0	0.000	0.000	0.000	0.000	0.000	0.000
12	4	5	growth factor receptor-bound protein 10	P000567	15424	17671	400	11822	11820	947	10280	10387	565	78	61	0	0	0	0	0	0	0	0	0	0	0	0	0	0	0	0	0	0	0	0	0	0	0	0	0	0	0	0	0.000	0.000	0.000	0.000	0.000	0.000
12	5	5	growth factor receptor-bound protein 10	P000567	16022	17671	400	12080	12116	770	11052	11214	1336	27	2	0	0	0	0	0	0	0	0	0	0	0	0	0	0	0	0	0	0	0	0	0	0	0	0	0	0	0	0	0.000	0.000	0.000	0.000	0.000	0.000
12	6	5	growth factor receptor-bound protein 10	P000567	16619	17671	400	12594	12649	886	11308	11669	1844	25	0	0	0	0	0	0	0	0	0	0	0	0	0	0	0	0	0	0	0	0	0	0	0	0	0	0	0	0	0	0.000	0.000	0.000	0.000	0.000	0.000
13	1	1	Cy5/Cy3 labeled biotin-BSA marker proteins	n/a	2730	18339	400	11822	12276	1689	12080	12133	901	18	10	0	0	0	0	0	0	0	0	0	0	0	0	0	0	0	0	0	0	0	0	0	0	0	0	0	0	0	0	0.000	0.000	0.000	0.000	0.000	0.000
13	2	1	Cy5/Cy3 labeled biotin-BSA marker proteins	n/a	3327	18339	400	12336	12559	1581	12080	12432	1384	14	8	0	0	0	0	0	0	0	0	0	0	0	0	0	0	0	0	0	0	0	0	0	0	0	0	0	0	0	0	0.000	0.000	0.000	0.000	0.000	0.000
13	3	1	empty	empty	3925	18339	400	12594	12890	1479	12336	12331	967	35	21	0	0	0	0	0	0	0	0	0	0	0	0	0	0	0	0	0	0	0	0	0	0	0	0	0	0	0	0	0.000	0.000	0.000	0.000	0.000	0.000
13	4	1	empty	empty	4522	18339	400	12336	12375	1054	12080	12237	1010	22	9	0	0	0	0	0	0	0	0	0	0	0	0	0	0	0	0	0	0	0	0	0	0	0	0	0	0	0	0	0.000	0.000	0.000	0.000	0.000	0.000
13	5	1	empty	empty	5120	18339	400	13622	13829	1698	12080	12207	811	65	44	0	0	0	0	0	0	0	0	0	0	0	0	0	0	0	0	0	0	0	0	0	0	0	0	0	0	0	0	0.000	0.000	0.000	0.000	0.000	0.000
13	6	1	empty	empty	5717	18339	400	12594	12327	753	12594	13116	1393	1	0	0	0	0	0	0	0	0	0	0	0	0	0	0	0	0	0	0	0	0	0	0	0	0	0	0	0	0	0	0.000	0.000	0.000	0.000	0.000	0.000
13	1	2	cell division cycle 2; G1 to S and G2 to M; transcript variant 1	P000051	2730	19093	400	14392	14256	1379	12080	12137	843	81	67	0	0	0	0	0	0	0	0	0	0	0	0	0	0	0	0	0	0	0	0	0	0	0	0	0	0	0	0	0.000	0.000	0.000	0.000	0.000	0.000
13	2	2	cell division cycle 2; G1 to S and G2 to M; transcript variant 1	P000051	3327	19093	400	14392	14205	1264	12080	12499	1975	63	6	0	0	0	0	0	0	0	0	0	0	0	0	0	0	0	0	0	0	0	0	0	0	0	0	0	0	0	0	0.000	0.000	0.000	0.000	0.000	0.000
13	3	2	cell division cycle 2; G1 to S and G2 to M; transcript variant 1	P000051	3925	19093	400	13878	13900	1169	12080	12345	1888	46	4	0	0	0	0	0	0	0	0	0	0	0	0	0	0	0	0	0	0	0	0	0	0	0	0	0	0	0	0	0.000	0.000	0.000	0.000	0.000	0.000
13	4	2	cell division cycle 2; G1 to S and G2 to M; transcript variant 1	P000051	4522	19093	400	14136	13972	986	12336	12379	1120	70	29	0	0	0	0	0	0	0	0	0	0	0	0	0	0	0	0	0	0	0	0	0	0	0	0	0	0	0	0	0.000	0.000	0.000	0.000	0.000	0.000
13	5	2	ret proto-oncogene (multiple endocrine neoplasia and medullary thyroid carcinoma 1; Hirschsprung disease)	P000166	5120	19093	400	14650	16019	4296	12594	12880	994	70	52	0	0	0	0	0	0	0	0	0	0	0	0	0	0	0	0	0	0	0	0	0	0	0	0	0	0	0	0	0.000	0.000	0.000	0.000	0.000	0.000
13	6	2	ret proto-oncogene (multiple endocrine neoplasia and medullary thyroid carcinoma 1; Hirschsprung disease)	P000166	5717	19093	400	14650	14739	1255	13108	13500	1420	51	8	0	0	0	0	0	0	0	0	0	0	0	0	0	0	0	0	0	0	0	0	0	0	0	0	0	0	0	0	0.000	0.000	0.000	0.000	0.000	0.000
13	1	3	ret proto-oncogene (multiple endocrine neoplasia and medullary thyroid carcinoma 1; Hirschsprung disease)	P000166	2730	19846	400	13364	13266	1006	11566	11802	1261	74	26	0	0	0	0	0	0	0	0	0	0	0	0	0	0	0	0	0	0	0	0	0	0	0	0	0	0	0	0	0.000	0.000	0.000	0.000	0.000	0.000
13	2	3	ret proto-oncogene (multiple endocrine neoplasia and medullary thyroid carcinoma 1; Hirschsprung disease)	P000166	3327	19846	400	14392	17451	6592	11566	11632	860	83	70	0	0	0	0	0	0	0	0	0	0	0	0	0	0	0	0	0	0	0	0	0	0	0	0	0	0	0	0	0.000	0.000	0.000	0.000	0.000	0.000
13	3	3	calcium/calmodulin-dependent protein kinase (CaM kinase) II gamma	P000336	3925	19846	400	17990	17344	1837	12336	12260	725	97	93	0	0	0	0	0	0	0	0	0	0	0	0	0	0	0	0	0	0	0	0	0	0	0	0	0	0	0	0	0.000	0.000	0.000	0.000	0.000	0.000
13	4	3	calcium/calmodulin-dependent protein kinase (CaM kinase) II gamma	P000336	4522	19846	400	17476	17377	2236	12336	13098	1788	92	78	0	0	0	0	0	0	0	0	0	0	0	0	0	0	0	0	0	0	0	0	0	0	0	0	0	0	0	0	0.000	0.000	0.000	0.000	0.000	0.000
13	5	3	calcium/calmodulin-dependent protein kinase (CaM kinase) II gamma	P000336	5120	19846	400	17990	17643	2304	13364	13414	815	93	81	0	0	0	0	0	0	0	0	0	0	0	0	0	0	0	0	0	0	0	0	0	0	0	0	0	0	0	0	0.000	0.000	0.000	0.000	0.000	0.000
13	6	3	calcium/calmodulin-dependent protein kinase (CaM kinase) II gamma	P000336	5717	19846	400	18504	18261	1598	13108	13263	781	99	96	0	0	0	0	0	0	0	0	0	0	0	0	0	0	0	0	0	0	0	0	0	0	0	0	0	0	0	0	0.000	0.000	0.000	0.000	0.000	0.000
13	1	4	growth factor receptor-bound protein 2	P000439	2730	20600	400	13622	14601	3808	11822	11907	927	73	44	0	0	0	0	0	0	0	0	0	0	0	0	0	0	0	0	0	0	0	0	0	0	0	0	0	0	0	0	0.000	0.000	0.000	0.000	0.000	0.000
13	2	4	growth factor receptor-bound protein 2	P000439	3327	20600	400	13364	13510	941	12080	11975	712	75	47	0	0	0	0	0	0	0	0	0	0	0	0	0	0	0	0	0	0	0	0	0	0	0	0	0	0	0	0	0.000	0.000	0.000	0.000	0.000	0.000
13	3	4	growth factor receptor-bound protein 2	P000439	3925	20600	400	13108	13784	2622	12080	13378	4606	8	4	0	0	0	0	0	0	0	0	0	0	0	0	0	0	0	0	0	0	0	0	0	0	0	0	0	0	0	0	0.000	0.000	0.000	0.000	0.000	0.000
13	4	4	growth factor receptor-bound protein 2	P000439	4522	20600	400	15164	15695	2312	13364	15681	6532	8	0	0	0	0	0	0	0	0	0	0	0	0	0	0	0	0	0	0	0	0	0	0	0	0	0	0	0	0	0	0.000	0.000	0.000	0.000	0.000	0.000
13	5	4	damage-specific DNA binding protein 1; 127kDa	P000546	5120	20600	400	14392	14369	1113	12594	12931	1325	66	24	0	0	0	0	0	0	0	0	0	0	0	0	0	0	0	0	0	0	0	0	0	0	0	0	0	0	0	0	0.000	0.000	0.000	0.000	0.000	0.000
13	6	4	damage-specific DNA binding protein 1; 127kDa	P000546	5717	20600	400	14650	14757	1449	12594	13433	2619	21	5	0	0	0	0	0	0	0	0	0	0	0	0	0	0	0	0	0	0	0	0	0	0	0	0	0	0	0	0	0.000	0.000	0.000	0.000	0.000	0.000
13	1	5	damage-specific DNA binding protein 1; 127kDa	P000546	2730	21353	400	13108	13078	863	11822	12334	1280	57	6	0	0	0	0	0	0	0	0	0	0	0	0	0	0	0	0	0	0	0	0	0	0	0	0	0	0	0	0	0.000	0.000	0.000	0.000	0.000	0.000
13	2	5	damage-specific DNA binding protein 1; 127kDa	P000546	3327	21353	400	13878	13809	1049	12336	12338	979	75	31	0	0	0	0	0	0	0	0	0	0	0	0	0	0	0	0	0	0	0	0	0	0	0	0	0	0	0	0	0.000	0.000	0.000	0.000	0.000	0.000
13	3	5	Buffer	n/a	3925	21353	400	12080	12284	624	13108	14031	2873	0	0	0	0	0	0	0	0	0	0	0	0	0	0	0	0	0	0	0	0	0	0	0	0	0	0	0	0	0	0	0.000	0.000	0.000	0.000	0.000	0.000
13	4	5	Buffer	n/a	4522	21353	400	12850	12776	668	13108	13122	1189	1	0	0	0	0	0	0	0	0	0	0	0	0	0	0	0	0	0	0	0	0	0	0	0	0	0	0	0	0	0	0.000	0.000	0.000	0.000	0.000	0.000
13	5	5	Buffer	n/a	5120	21353	400	13108	13058	736	12850	13271	1377	4	0	0	0	0	0	0	0	0	0	0	0	0	0	0	0	0	0	0	0	0	0	0	0	0	0	0	0	0	0	0.000	0.000	0.000	0.000	0.000	0.000
13	6	5	Buffer	n/a	5717	21353	400	12850	13043	837	13364	13747	1772	4	0	0	0	0	0	0	0	0	0	0	0	0	0	0	0	0	0	0	0	0	0	0	0	0	0	0	0	0	0	0.000	0.000	0.000	0.000	0.000	0.000
14	1	1	BCCP-Myc4	n/a	6339	18339	400	13364	13233	753	13364	13755	2588	0	0	0	0	0	0	0	0	0	0	0	0	0	0	0	0	0	0	0	0	0	0	0	0	0	0	0	0	0	0	0.000	0.000	0.000	0.000	0.000	0.000
14	2	1	BCCP-Myc4	n/a	6936	18339	400	13364	13238	493	12336	12351	846	59	4	0	0	0	0	0	0	0	0	0	0	0	0	0	0	0	0	0	0	0	0	0	0	0	0	0	0	0	0	0.000	0.000	0.000	0.000	0.000	0.000
14	3	1	empty	empty	7534	18339	400	12850	12702	832	12850	12658	612	15	7	0	0	0	0	0	0	0	0	0	0	0	0	0	0	0	0	0	0	0	0	0	0	0	0	0	0	0	0	0.000	0.000	0.000	0.000	0.000	0.000
14	4	1	empty	empty	8131	18339	400	12336	12387	628	12594	12565	679	9	0	0	0	0	0	0	0	0	0	0	0	0	0	0	0	0	0	0	0	0	0	0	0	0	0	0	0	0	0	0.000	0.000	0.000	0.000	0.000	0.000
14	5	1	empty	empty	8729	18339	400	12336	12831	1153	12594	12447	762	30	17	0	0	0	0	0	0	0	0	0	0	0	0	0	0	0	0	0	0	0	0	0	0	0	0	0	0	0	0	0.000	0.000	0.000	0.000	0.000	0.000
14	6	1	empty	empty	9326	18339	400	11822	12001	740	11566	11681	627	33	19	0	0	0	0	0	0	0	0	0	0	0	0	0	0	0	0	0	0	0	0	0	0	0	0	0	0	0	0	0.000	0.000	0.000	0.000	0.000	0.000
14	1	2	mitogen-activated protein kinase kinase 3; transcript variant B	P000029	6339	19093	400	19018	19422	3306	13622	14657	3637	75	24	0	0	0	0	0	0	0	0	0	0	0	0	0	0	0	0	0	0	0	0	0	0	0	0	0	0	0	0	0.000	0.000	0.000	0.000	0.000	0.000
14	2	2	mitogen-activated protein kinase kinase 3; transcript variant B	P000029	6936	19093	400	18762	18299	1717	12850	12642	760	100	100	0	0	0	0	0	0	0	0	0	0	0	0	0	0	0	0	0	0	0	0	0	0	0	0	0	0	0	0	0.000	0.000	0.000	0.000	0.000	0.000
14	3	2	mitogen-activated protein kinase kinase 3; transcript variant B	P000029	7534	19093	400	17220	16977	1410	12594	13453	2523	88	34	0	0	0	0	0	0	0	0	0	0	0	0	0	0	0	0	0	0	0	0	0	0	0	0	0	0	0	0	0.000	0.000	0.000	0.000	0.000	0.000
14	4	2	mitogen-activated protein kinase kinase 3; transcript variant B	P000029	8131	19093	400	16706	17852	3645	12594	12909	1591	88	66	0	0	0	0	0	0	0	0	0	0	0	0	0	0	0	0	0	0	0	0	0	0	0	0	0	0	0	0	0.000	0.000	0.000	0.000	0.000	0.000
14	5	2	retinoic acid receptor; alpha	P000120	8729	19093	400	18248	18214	2516	12080	12166	627	99	97	0	0	0	0	0	0	0	0	0	0	0	0	0	0	0	0	0	0	0	0	0	0	0	0	0	0	0	0	0.000	0.000	0.000	0.000	0.000	0.000
14	6	2	retinoic acid receptor; alpha	P000120	9326	19093	400	17476	17197	2111	11822	11710	577	100	98	0	0	0	0	0	0	0	0	0	0	0	0	0	0	0	0	0	0	0	0	0	0	0	0	0	0	0	0	0.000	0.000	0.000	0.000	0.000	0.000
14	1	3	retinoic acid receptor; alpha	P000120	6339	19846	400	20560	20197	2345	12850	12874	984	97	96	0	0	0	0	0	0	0	0	0	0	0	0	0	0	0	0	0	0	0	0	0	0	0	0	0	0	0	0	0.000	0.000	0.000	0.000	0.000	0.000
14	2	3	retinoic acid receptor; alpha	P000120	6936	19846	400	19790	19777	2841	12850	12568	1040	100	99	0	0	0	0	0	0	0	0	0	0	0	0	0	0	0	0	0	0	0	0	0	0	0	0	0	0	0	0	0.000	0.000	0.000	0.000	0.000	0.000
14	3	3	nuclear receptor subfamily 4; group A; member 1; transcript variant 1	P000315	7534	19846	400	23644	22939	1963	12080	12476	1832	100	100	0	0	0	0	0	0	0	0	0	0	0	0	0	0	0	0	0	0	0	0	0	0	0	0	0	0	0	0	0.000	0.000	0.000	0.000	0.000	0.000
14	4	3	nuclear receptor subfamily 4; group A; member 1; transcript variant 1	P000315	8131	19846	400	22874	23452	3065	12080	12204	1037	100	100	0	0	0	0	0	0	0	0	0	0	0	0	0	0	0	0	0	0	0	0	0	0	0	0	0	0	0	0	0.000	0.000	0.000	0.000	0.000	0.000
14	5	3	nuclear receptor subfamily 4; group A; member 1; transcript variant 1	P000315	8729	19846	400	21332	20732	1981	11822	11896	809	100	100	0	0	0	0	0	0	0	0	0	0	0	0	0	0	0	0	0	0	0	0	0	0	0	0	0	0	0	0	0.000	0.000	0.000	0.000	0.000	0.000
14	6	3	nuclear receptor subfamily 4; group A; member 1; transcript variant 1	P000315	9326	19846	400	21588	21193	2379	12080	12324	1429	100	98	0	0	0	0	0	0	0	0	0	0	0	0	0	0	0	0	0	0	0	0	0	0	0	0	0	0	0	0	0.000	0.000	0.000	0.000	0.000	0.000
14	1	4	growth arrest and DNA-damage-inducible; gamma	P000419	6339	20600	400	14906	14965	912	12850	13107	1308	82	24	0	0	0	0	0	0	0	0	0	0	0	0	0	0	0	0	0	0	0	0	0	0	0	0	0	0	0	0	0.000	0.000	0.000	0.000	0.000	0.000
14	2	4	growth arrest and DNA-damage-inducible; gamma	P000419	6936	20600	400	14392	15193	2923	12850	12755	788	63	47	0	0	0	0	0	0	0	0	0	0	0	0	0	0	0	0	0	0	0	0	0	0	0	0	0	0	0	0	0.000	0.000	0.000	0.000	0.000	0.000
14	3	4	growth arrest and DNA-damage-inducible; gamma	P000419	7534	20600	400	14136	15277	3207	12080	12298	773	71	53	0	0	0	0	0	0	0	0	0	0	0	0	0	0	0	0	0	0	0	0	0	0	0	0	0	0	0	0	0.000	0.000	0.000	0.000	0.000	0.000
14	4	4	growth arrest and DNA-damage-inducible; gamma	P000419	8131	20600	400	13108	13103	1153	12336	12453	913	44	9	0	0	0	0	0	0	0	0	0	0	0	0	0	0	0	0	0	0	0	0	0	0	0	0	0	0	0	0	0.000	0.000	0.000	0.000	0.000	0.000
14	5	4	cyclin H	P000515	8729	20600	400	13622	13516	1427	11822	11954	964	67	44	0	0	0	0	0	0	0	0	0	0	0	0	0	0	0	0	0	0	0	0	0	0	0	0	0	0	0	0	0.000	0.000	0.000	0.000	0.000	0.000
14	6	4	cyclin H	P000515	9326	20600	400	12850	12756	1081	12080	12452	1458	23	1	0	0	0	0	0	0	0	0	0	0	0	0	0	0	0	0	0	0	0	0	0	0	0	0	0	0	0	0	0.000	0.000	0.000	0.000	0.000	0.000
14	1	5	cyclin H	P000515	6339	21353	400	15678	16016	1691	13364	13587	1311	78	41	0	0	0	0	0	0	0	0	0	0	0	0	0	0	0	0	0	0	0	0	0	0	0	0	0	0	0	0	0.000	0.000	0.000	0.000	0.000	0.000
14	2	5	cyclin H	P000515	6936	21353	400	14906	15009	737	12594	12591	658	98	92	0	0	0	0	0	0	0	0	0	0	0	0	0	0	0	0	0	0	0	0	0	0	0	0	0	0	0	0	0.000	0.000	0.000	0.000	0.000	0.000
14	3	5	PX domain containing serine/threonine kinase	P001106	7534	21353	400	14136	14112	913	12080	12240	608	95	82	0	0	0	0	0	0	0	0	0	0	0	0	0	0	0	0	0	0	0	0	0	0	0	0	0	0	0	0	0.000	0.000	0.000	0.000	0.000	0.000
14	4	5	PX domain containing serine/threonine kinase	P001106	8131	21353	400	13878	13757	675	11822	11867	901	93	53	0	0	0	0	0	0	0	0	0	0	0	0	0	0	0	0	0	0	0	0	0	0	0	0	0	0	0	0	0.000	0.000	0.000	0.000	0.000	0.000
14	5	5	PX domain containing serine/threonine kinase	P001106	8729	21353	400	13108	13078	636	11951	11895	906	57	13	0	0	0	0	0	0	0	0	0	0	0	0	0	0	0	0	0	0	0	0	0	0	0	0	0	0	0	0	0.000	0.000	0.000	0.000	0.000	0.000
14	6	5	PX domain containing serine/threonine kinase	P001106	9326	21353	400	13622	13481	853	11308	11319	654	97	77	0	0	0	0	0	0	0	0	0	0	0	0	0	0	0	0	0	0	0	0	0	0	0	0	0	0	0	0	0.000	0.000	0.000	0.000	0.000	0.000
15	1	1	Phosphopeptide4	empty	9998	18364	400	11822	11642	635	12080	11912	867	0	0	0	0	0	0	0	0	0	0	0	0	0	0	0	0	0	0	0	0	0	0	0	0	0	0	0	0	0	0	0.000	0.000	0.000	0.000	0.000	0.000
15	2	1	Phosphopeptide4	empty	10595	18364	400	11308	11255	527	11566	12715	2653	0	0	0	0	0	0	0	0	0	0	0	0	0	0	0	0	0	0	0	0	0	0	0	0	0	0	0	0	0	0	0.000	0.000	0.000	0.000	0.000	0.000
15	3	1	empty	empty	11193	18364	400	12336	12320	1013	11052	11435	1094	54	17	0	0	0	0	0	0	0	0	0	0	0	0	0	0	0	0	0	0	0	0	0	0	0	0	0	0	0	0	0.000	0.000	0.000	0.000	0.000	0.000
15	4	1	empty	empty	11790	18364	400	11052	11237	797	11052	11293	654	30	8	0	0	0	0	0	0	0	0	0	0	0	0	0	0	0	0	0	0	0	0	0	0	0	0	0	0	0	0	0.000	0.000	0.000	0.000	0.000	0.000
15	5	1	empty	empty	12388	18364	400	11566	11471	445	11308	11337	873	8	0	0	0	0	0	0	0	0	0	0	0	0	0	0	0	0	0	0	0	0	0	0	0	0	0	0	0	0	0	0.000	0.000	0.000	0.000	0.000	0.000
15	6	1	empty	empty	12985	18364	400	10666	10659	1151	10538	10588	882	21	5	0	0	0	0	0	0	0	0	0	0	0	0	0	0	0	0	0	0	0	0	0	0	0	0	0	0	0	0	0.000	0.000	0.000	0.000	0.000	0.000
15	1	2	v-raf-1 murine leukemia viral oncogene homolog 1	P000010	9998	19118	400	12594	12686	791	11566	12113	1832	16	0	0	0	0	0	0	0	0	0	0	0	0	0	0	0	0	0	0	0	0	0	0	0	0	0	0	0	0	0	0.000	0.000	0.000	0.000	0.000	0.000
15	2	2	v-raf-1 murine leukemia viral oncogene homolog 1	P000010	10595	19118	400	11822	11811	480	12080	12555	2171	0	0	0	0	0	0	0	0	0	0	0	0	0	0	0	0	0	0	0	0	0	0	0	0	0	0	0	0	0	0	0.000	0.000	0.000	0.000	0.000	0.000
15	3	2	v-raf-1 murine leukemia viral oncogene homolog 1	P000010	11193	19118	400	12336	12382	777	11052	11081	633	82	64	0	0	0	0	0	0	0	0	0	0	0	0	0	0	0	0	0	0	0	0	0	0	0	0	0	0	0	0	0.000	0.000	0.000	0.000	0.000	0.000
15	4	2	v-raf-1 murine leukemia viral oncogene homolog 1	P000010	11790	19118	400	12080	12062	1340	10794	11214	1346	43	10	0	0	0	0	0	0	0	0	0	0	0	0	0	0	0	0	0	0	0	0	0	0	0	0	0	0	0	0	0.000	0.000	0.000	0.000	0.000	0.000
15	5	2	serine/threonine kinase 17b (apoptosis-inducing)	P000090	12388	19118	400	17990	17942	1755	10794	11239	1510	100	100	0	0	0	0	0	0	0	0	0	0	0	0	0	0	0	0	0	0	0	0	0	0	0	0	0	0	0	0	0.000	0.000	0.000	0.000	0.000	0.000
15	6	2	serine/threonine kinase 17b (apoptosis-inducing)	P000090	12985	19118	400	18248	17930	1632	11052	10959	1822	100	97	0	0	0	0	0	0	0	0	0	0	0	0	0	0	0	0	0	0	0	0	0	0	0	0	0	0	0	0	0.000	0.000	0.000	0.000	0.000	0.000
15	1	3	serine/threonine kinase 17b (apoptosis-inducing)	P000090	9998	19871	400	16962	17400	2128	10794	10907	810	100	100	0	0	0	0	0	0	0	0	0	0	0	0	0	0	0	0	0	0	0	0	0	0	0	0	0	0	0	0	0.000	0.000	0.000	0.000	0.000	0.000
15	2	3	serine/threonine kinase 17b (apoptosis-inducing)	P000090	10595	19871	400	16706	16765	1614	10794	11023	744	100	100	0	0	0	0	0	0	0	0	0	0	0	0	0	0	0	0	0	0	0	0	0	0	0	0	0	0	0	0	0.000	0.000	0.000	0.000	0.000	0.000
15	3	3	guanine nucleotide binding protein (G protein); gamma transducing activity polypeptide 2	P000300	11193	19871	400	12080	12244	975	10538	10644	671	89	61	0	0	0	0	0	0	0	0	0	0	0	0	0	0	0	0	0	0	0	0	0	0	0	0	0	0	0	0	0.000	0.000	0.000	0.000	0.000	0.000
15	4	3	guanine nucleotide binding protein (G protein); gamma transducing activity polypeptide 2	P000300	11790	19871	400	12336	12718	1180	10794	10841	673	90	58	0	0	0	0	0	0	0	0	0	0	0	0	0	0	0	0	0	0	0	0	0	0	0	0	0	0	0	0	0.000	0.000	0.000	0.000	0.000	0.000
15	5	3	guanine nucleotide binding protein (G protein); gamma transducing activity polypeptide 2	P000300	12388	19871	400	12080	13186	2995	11052	11334	1605	30	19	0	0	0	0	0	0	0	0	0	0	0	0	0	0	0	0	0	0	0	0	0	0	0	0	0	0	0	0	0.000	0.000	0.000	0.000	0.000	0.000
15	6	3	guanine nucleotide binding protein (G protein); gamma transducing activity polypeptide 2	P000300	12985	19871	400	12080	12596	1585	11052	11065	651	69	41	0	0	0	0	0	0	0	0	0	0	0	0	0	0	0	0	0	0	0	0	0	0	0	0	0	0	0	0	0.000	0.000	0.000	0.000	0.000	0.000
15	1	4	brain-derived neurotrophic factor; transcript variant 5	P000387	9998	20625	400	11822	11840	847	11052	11043	730	56	26	0	0	0	0	0	0	0	0	0	0	0	0	0	0	0	0	0	0	0	0	0	0	0	0	0	0	0	0	0.000	0.000	0.000	0.000	0.000	0.000
15	2	4	brain-derived neurotrophic factor; transcript variant 5	P000387	10595	20625	400	11822	11768	683	11308	11433	542	44	18	0	0	0	0	0	0	0	0	0	0	0	0	0	0	0	0	0	0	0	0	0	0	0	0	0	0	0	0	0.000	0.000	0.000	0.000	0.000	0.000
15	3	4	brain-derived neurotrophic factor; transcript variant 5	P000387	11193	20625	400	12080	12064	611	10538	10643	685	90	62	0	0	0	0	0	0	0	0	0	0	0	0	0	0	0	0	0	0	0	0	0	0	0	0	0	0	0	0	0.000	0.000	0.000	0.000	0.000	0.000
15	4	4	brain-derived neurotrophic factor; transcript variant 5	P000387	11790	20625	400	11566	11647	1180	10538	10801	716	63	37	0	0	0	0	0	0	0	0	0	0	0	0	0	0	0	0	0	0	0	0	0	0	0	0	0	0	0	0	0.000	0.000	0.000	0.000	0.000	0.000
15	5	4	cyclin B1	P000492	12388	20625	400	13364	14877	4116	11052	10959	504	92	85	0	0	0	0	0	0	0	0	0	0	0	0	0	0	0	0	0	0	0	0	0	0	0	0	0	0	0	0	0.000	0.000	0.000	0.000	0.000	0.000
15	6	4	cyclin B1	P000492	12985	20625	400	12850	13824	2985	11052	11054	602	76	64	0	0	0	0	0	0	0	0	0	0	0	0	0	0	0	0	0	0	0	0	0	0	0	0	0	0	0	0	0.000	0.000	0.000	0.000	0.000	0.000
15	1	5	cyclin B1	P000492	9998	21378	400	13108	12940	739	11052	12336	4735	0	0	0	0	0	0	0	0	0	0	0	0	0	0	0	0	0	0	0	0	0	0	0	0	0	0	0	0	0	0	0.000	0.000	0.000	0.000	0.000	0.000
15	2	5	cyclin B1	P000492	10595	21378	400	14136	14081	1412	11308	11352	566	91	86	0	0	0	0	0	0	0	0	0	0	0	0	0	0	0	0	0	0	0	0	0	0	0	0	0	0	0	0	0.000	0.000	0.000	0.000	0.000	0.000
15	3	5	bromodomain containing 8	P000795	11193	21378	400	12594	12596	844	11052	10982	667	86	54	0	0	0	0	0	0	0	0	0	0	0	0	0	0	0	0	0	0	0	0	0	0	0	0	0	0	0	0	0.000	0.000	0.000	0.000	0.000	0.000
15	4	5	bromodomain containing 8	P000795	11790	21378	400	12594	12787	1442	10794	11052	886	75	52	0	0	0	0	0	0	0	0	0	0	0	0	0	0	0	0	0	0	0	0	0	0	0	0	0	0	0	0	0.000	0.000	0.000	0.000	0.000	0.000
15	5	5	bromodomain containing 8	P000795	12388	21378	400	11052	10977	740	10794	11792	3175	0	0	0	0	0	0	0	0	0	0	0	0	0	0	0	0	0	0	0	0	0	0	0	0	0	0	0	0	0	0	0.000	0.000	0.000	0.000	0.000	0.000
15	6	5	bromodomain containing 8	P000795	12985	21378	400	11566	11553	821	11052	10951	948	35	3	0	0	0	0	0	0	0	0	0	0	0	0	0	0	0	0	0	0	0	0	0	0	0	0	0	0	0	0	0.000	0.000	0.000	0.000	0.000	0.000
16	1	1	Cy5/Cy3 labeled biotin-BSA marker proteins	n/a	13631	18413	400	10794	10715	458	10280	10334	637	37	3	0	0	0	0	0	0	0	0	0	0	0	0	0	0	0	0	0	0	0	0	0	0	0	0	0	0	0	0	0.000	0.000	0.000	0.000	0.000	0.000
16	2	1	Cy5/Cy3 labeled biotin-BSA marker proteins	n/a	14228	18413	400	10538	10488	788	10794	10665	808	4	0	0	0	0	0	0	0	0	0	0	0	0	0	0	0	0	0	0	0	0	0	0	0	0	0	0	0	0	0	0.000	0.000	0.000	0.000	0.000	0.000
16	3	1	empty	empty	14826	18413	400	11308	11239	666	10794	10819	626	38	15	0	0	0	0	0	0	0	0	0	0	0	0	0	0	0	0	0	0	0	0	0	0	0	0	0	0	0	0	0.000	0.000	0.000	0.000	0.000	0.000
16	4	1	empty	empty	15423	18413	400	10538	10510	754	10794	10792	745	13	0	0	0	0	0	0	0	0	0	0	0	0	0	0	0	0	0	0	0	0	0	0	0	0	0	0	0	0	0	0.000	0.000	0.000	0.000	0.000	0.000
16	5	1	empty	empty	16021	18413	400	11566	11760	1156	11308	11365	947	26	11	0	0	0	0	0	0	0	0	0	0	0	0	0	0	0	0	0	0	0	0	0	0	0	0	0	0	0	0	0.000	0.000	0.000	0.000	0.000	0.000
16	6	1	empty	empty	16618	18413	400	11566	11548	756	11308	11274	840	18	0	0	0	0	0	0	0	0	0	0	0	0	0	0	0	0	0	0	0	0	0	0	0	0	0	0	0	0	0	0.000	0.000	0.000	0.000	0.000	0.000
16	1	2	BCCP only (no Myc tag)	n/a	13631	19167	400	11308	11256	722	10794	10748	418	60	29	0	0	0	0	0	0	0	0	0	0	0	0	0	0	0	0	0	0	0	0	0	0	0	0	0	0	0	0	0.000	0.000	0.000	0.000	0.000	0.000
16	2	2	BCCP only (no Myc tag)	n/a	14228	19167	400	11308	11304	955	10794	10811	756	49	18	0	0	0	0	0	0	0	0	0	0	0	0	0	0	0	0	0	0	0	0	0	0	0	0	0	0	0	0	0.000	0.000	0.000	0.000	0.000	0.000
16	3	2	BCCP only (no Myc tag)	n/a	14826	19167	400	11566	11812	956	10538	10413	520	72	43	0	0	0	0	0	0	0	0	0	0	0	0	0	0	0	0	0	0	0	0	0	0	0	0	0	0	0	0	0.000	0.000	0.000	0.000	0.000	0.000
16	4	2	BCCP only (no Myc tag)	n/a	15423	19167	400	11052	11129	779	11308	11089	912	11	0	0	0	0	0	0	0	0	0	0	0	0	0	0	0	0	0	0	0	0	0	0	0	0	0	0	0	0	0	0.000	0.000	0.000	0.000	0.000	0.000
16	5	2	inhibitor of kappa light polypeptide gene enhancer in B-cells; kinase beta	P000077	16021	19167	400	11308	11159	490	10794	10911	742	32	1	0	0	0	0	0	0	0	0	0	0	0	0	0	0	0	0	0	0	0	0	0	0	0	0	0	0	0	0	0.000	0.000	0.000	0.000	0.000	0.000
16	6	2	inhibitor of kappa light polypeptide gene enhancer in B-cells; kinase beta	P000077	16618	19167	400	12080	12181	784	11308	11318	724	63	21	0	0	0	0	0	0	0	0	0	0	0	0	0	0	0	0	0	0	0	0	0	0	0	0	0	0	0	0	0.000	0.000	0.000	0.000	0.000	0.000
16	1	3	inhibitor of kappa light polypeptide gene enhancer in B-cells; kinase beta	P000077	13631	19920	400	11308	11421	1106	11052	11030	748	40	17	0	0	0	0	0	0	0	0	0	0	0	0	0	0	0	0	0	0	0	0	0	0	0	0	0	0	0	0	0.000	0.000	0.000	0.000	0.000	0.000
16	2	3	inhibitor of kappa light polypeptide gene enhancer in B-cells; kinase beta	P000077	14228	19920	400	11308	11328	926	10794	10742	882	35	16	0	0	0	0	0	0	0	0	0	0	0	0	0	0	0	0	0	0	0	0	0	0	0	0	0	0	0	0	0.000	0.000	0.000	0.000	0.000	0.000
16	3	3	exostoses (multiple) 2	P000256	14826	19920	400	11308	11338	587	10794	10794	905	34	0	0	0	0	0	0	0	0	0	0	0	0	0	0	0	0	0	0	0	0	0	0	0	0	0	0	0	0	0	0.000	0.000	0.000	0.000	0.000	0.000
16	4	3	exostoses (multiple) 2	P000256	15423	19920	400	11308	11057	838	11052	11053	850	11	0	0	0	0	0	0	0	0	0	0	0	0	0	0	0	0	0	0	0	0	0	0	0	0	0	0	0	0	0	0.000	0.000	0.000	0.000	0.000	0.000
16	5	3	exostoses (multiple) 2	P000256	16021	19920	400	11566	11648	815	11308	11134	650	32	13	0	0	0	0	0	0	0	0	0	0	0	0	0	0	0	0	0	0	0	0	0	0	0	0	0	0	0	0	0.000	0.000	0.000	0.000	0.000	0.000
16	6	3	exostoses (multiple) 2	P000256	16618	19920	400	12080	11952	887	11308	11475	830	45	11	0	0	0	0	0	0	0	0	0	0	0	0	0	0	0	0	0	0	0	0	0	0	0	0	0	0	0	0	0.000	0.000	0.000	0.000	0.000	0.000
16	1	4	cAMP-regulated guanine nucleotide exchange factor II	P000356	13631	20674	400	11566	11482	903	10538	10596	797	59	22	0	0	0	0	0	0	0	0	0	0	0	0	0	0	0	0	0	0	0	0	0	0	0	0	0	0	0	0	0.000	0.000	0.000	0.000	0.000	0.000
16	2	4	cAMP-regulated guanine nucleotide exchange factor II	P000356	14228	20674	400	11308	11324	600	10538	10576	725	55	20	0	0	0	0	0	0	0	0	0	0	0	0	0	0	0	0	0	0	0	0	0	0	0	0	0	0	0	0	0.000	0.000	0.000	0.000	0.000	0.000
16	3	4	cAMP-regulated guanine nucleotide exchange factor II	P000356	14826	20674	400	11052	11078	784	10794	11162	1341	8	0	0	0	0	0	0	0	0	0	0	0	0	0	0	0	0	0	0	0	0	0	0	0	0	0	0	0	0	0	0.000	0.000	0.000	0.000	0.000	0.000
16	4	4	cAMP-regulated guanine nucleotide exchange factor II	P000356	15423	20674	400	12080	11992	943	11308	11631	1337	22	0	0	0	0	0	0	0	0	0	0	0	0	0	0	0	0	0	0	0	0	0	0	0	0	0	0	0	0	0	0.000	0.000	0.000	0.000	0.000	0.000
16	5	4	secreted protein; acidic; cysteine-rich (osteonectin)	P000469	16021	20674	400	12080	12049	1035	11566	11762	680	49	23	0	0	0	0	0	0	0	0	0	0	0	0	0	0	0	0	0	0	0	0	0	0	0	0	0	0	0	0	0.000	0.000	0.000	0.000	0.000	0.000
16	6	4	secreted protein; acidic; cysteine-rich (osteonectin)	P000469	16618	20674	400	12336	12302	620	12080	11923	637	20	8	0	0	0	0	0	0	0	0	0	0	0	0	0	0	0	0	0	0	0	0	0	0	0	0	0	0	0	0	0.000	0.000	0.000	0.000	0.000	0.000
16	1	5	secreted protein; acidic; cysteine-rich (osteonectin)	P000469	13631	21427	400	11052	11601	1694	10280	10561	923	49	29	0	0	0	0	0	0	0	0	0	0	0	0	0	0	0	0	0	0	0	0	0	0	0	0	0	0	0	0	0.000	0.000	0.000	0.000	0.000	0.000
16	2	5	secreted protein; acidic; cysteine-rich (osteonectin)	P000469	14228	21427	400	11822	11758	1112	10794	10968	1234	44	10	0	0	0	0	0	0	0	0	0	0	0	0	0	0	0	0	0	0	0	0	0	0	0	0	0	0	0	0	0.000	0.000	0.000	0.000	0.000	0.000
16	3	5	guanine nucleotide binding protein (G protein); alpha inhibiting activity polypeptide 3	P000569	14826	21427	400	11822	11847	654	11308	11477	1150	19	0	0	0	0	0	0	0	0	0	0	0	0	0	0	0	0	0	0	0	0	0	0	0	0	0	0	0	0	0	0.000	0.000	0.000	0.000	0.000	0.000
16	4	5	guanine nucleotide binding protein (G protein); alpha inhibiting activity polypeptide 3	P000569	15423	21427	400	12080	12057	602	11566	11494	572	40	16	0	0	0	0	0	0	0	0	0	0	0	0	0	0	0	0	0	0	0	0	0	0	0	0	0	0	0	0	0.000	0.000	0.000	0.000	0.000	0.000
16	5	5	guanine nucleotide binding protein (G protein); alpha inhibiting activity polypeptide 3	P000569	16021	21427	400	12336	12187	1040	12080	12259	1183	16	0	0	0	0	0	0	0	0	0	0	0	0	0	0	0	0	0	0	0	0	0	0	0	0	0	0	0	0	0	0.000	0.000	0.000	0.000	0.000	0.000
16	6	5	guanine nucleotide binding protein (G protein); alpha inhibiting activity polypeptide 3	P000569	16618	21427	400	12336	12180	904	11308	11410	847	55	21	0	0	0	0	0	0	0	0	0	0	0	0	0	0	0	0	0	0	0	0	0	0	0	0	0	0	0	0	0.000	0.000	0.000	0.000	0.000	0.000
17	1	1	Cy5/Cy3 labeled biotin-BSA marker proteins	n/a	2730	22023	400	12594	12686	859	11822	12096	970	44	12	0	0	0	0	0	0	0	0	0	0	0	0	0	0	0	0	0	0	0	0	0	0	0	0	0	0	0	0	0.000	0.000	0.000	0.000	0.000	0.000
17	2	1	Cy5/Cy3 labeled biotin-BSA marker proteins	n/a	3327	22023	400	13364	13633	1216	12080	12158	604	78	58	0	0	0	0	0	0	0	0	0	0	0	0	0	0	0	0	0	0	0	0	0	0	0	0	0	0	0	0	0.000	0.000	0.000	0.000	0.000	0.000
17	3	1	empty	empty	3925	22023	400	12336	12510	839	12594	12842	892	13	3	0	0	0	0	0	0	0	0	0	0	0	0	0	0	0	0	0	0	0	0	0	0	0	0	0	0	0	0	0.000	0.000	0.000	0.000	0.000	0.000
17	4	1	empty	empty	4522	22023	400	13364	13757	1411	13108	13178	672	39	25	0	0	0	0	0	0	0	0	0	0	0	0	0	0	0	0	0	0	0	0	0	0	0	0	0	0	0	0	0.000	0.000	0.000	0.000	0.000	0.000
17	5	1	empty	empty	5120	22023	400	13364	13735	1859	13364	14011	1643	16	10	0	0	0	0	0	0	0	0	0	0	0	0	0	0	0	0	0	0	0	0	0	0	0	0	0	0	0	0	0.000	0.000	0.000	0.000	0.000	0.000
17	6	1	empty	empty	5717	22023	400	13364	13488	836	13364	13276	752	31	5	0	0	0	0	0	0	0	0	0	0	0	0	0	0	0	0	0	0	0	0	0	0	0	0	0	0	0	0	0.000	0.000	0.000	0.000	0.000	0.000
17	1	2	protein kinase C; zeta	P000052	2730	22777	400	25958	26102	5664	12336	12552	1585	100	99	0	0	0	0	0	0	0	0	0	0	0	0	0	0	0	0	0	0	0	0	0	0	0	0	0	0	0	0	0.000	0.000	0.000	0.000	0.000	0.000
17	2	2	protein kinase C; zeta	P000052	3327	22777	400	26214	25477	3012	12080	12061	638	100	100	0	0	0	0	0	0	0	0	0	0	0	0	0	0	0	0	0	0	0	0	0	0	0	0	0	0	0	0	0.000	0.000	0.000	0.000	0.000	0.000
17	3	2	protein kinase C; zeta	P000052	3925	22777	400	26214	26901	5864	12594	12733	1094	100	100	0	0	0	0	0	0	0	0	0	0	0	0	0	0	0	0	0	0	0	0	0	0	0	0	0	0	0	0	0.000	0.000	0.000	0.000	0.000	0.000
17	4	2	protein kinase C; zeta	P000052	4522	22777	400	26214	26065	4140	13364	13449	735	100	100	0	0	0	0	0	0	0	0	0	0	0	0	0	0	0	0	0	0	0	0	0	0	0	0	0	0	0	0	0.000	0.000	0.000	0.000	0.000	0.000
17	5	2	v-Ki-ras2 Kirsten rat sarcoma 2 viral oncogene homolog; transcript variant b	P000170	5120	22777	400	17476	17756	1460	13364	13843	1371	100	90	0	0	0	0	0	0	0	0	0	0	0	0	0	0	0	0	0	0	0	0	0	0	0	0	0	0	0	0	0.000	0.000	0.000	0.000	0.000	0.000
17	6	2	v-Ki-ras2 Kirsten rat sarcoma 2 viral oncogene homolog; transcript variant b	P000170	5717	22777	400	16706	16699	1416	12850	12846	723	99	95	0	0	0	0	0	0	0	0	0	0	0	0	0	0	0	0	0	0	0	0	0	0	0	0	0	0	0	0	0.000	0.000	0.000	0.000	0.000	0.000
17	1	3	v-Ki-ras2 Kirsten rat sarcoma 2 viral oncogene homolog; transcript variant b	P000170	2730	23530	400	16706	16604	1304	12080	12246	1565	98	82	0	0	0	0	0	0	0	0	0	0	0	0	0	0	0	0	0	0	0	0	0	0	0	0	0	0	0	0	0.000	0.000	0.000	0.000	0.000	0.000
17	2	3	v-Ki-ras2 Kirsten rat sarcoma 2 viral oncogene homolog; transcript variant b	P000170	3327	23530	400	16192	16129	1121	12080	14087	7409	0	0	0	0	0	0	0	0	0	0	0	0	0	0	0	0	0	0	0	0	0	0	0	0	0	0	0	0	0	0	0.000	0.000	0.000	0.000	0.000	0.000
17	3	3	inhibitor of DNA binding 2; dominant negative helix-loop-helix protein	P000339	3925	23530	400	15678	15629	1488	13108	15555	8875	0	0	0	0	0	0	0	0	0	0	0	0	0	0	0	0	0	0	0	0	0	0	0	0	0	0	0	0	0	0	0.000	0.000	0.000	0.000	0.000	0.000
17	4	3	inhibitor of DNA binding 2; dominant negative helix-loop-helix protein	P000339	4522	23530	400	15678	15654	1019	13622	13826	1055	81	44	0	0	0	0	0	0	0	0	0	0	0	0	0	0	0	0	0	0	0	0	0	0	0	0	0	0	0	0	0.000	0.000	0.000	0.000	0.000	0.000
17	5	3	inhibitor of DNA binding 2; dominant negative helix-loop-helix protein	P000339	5120	23530	400	15934	16080	1260	13878	14163	1426	73	25	0	0	0	0	0	0	0	0	0	0	0	0	0	0	0	0	0	0	0	0	0	0	0	0	0	0	0	0	0.000	0.000	0.000	0.000	0.000	0.000
17	6	3	inhibitor of DNA binding 2; dominant negative helix-loop-helix protein	P000339	5717	23530	400	15678	16309	2064	12594	12727	935	97	80	0	0	0	0	0	0	0	0	0	0	0	0	0	0	0	0	0	0	0	0	0	0	0	0	0	0	0	0	0.000	0.000	0.000	0.000	0.000	0.000
17	1	4	heat shock 70kDa protein 1A	P000440	2730	24284	400	13364	13233	899	12080	12230	1068	51	15	0	0	0	0	0	0	0	0	0	0	0	0	0	0	0	0	0	0	0	0	0	0	0	0	0	0	0	0	0.000	0.000	0.000	0.000	0.000	0.000
17	2	4	heat shock 70kDa protein 1A	P000440	3327	24284	400	13364	13328	1146	12594	12739	832	45	22	0	0	0	0	0	0	0	0	0	0	0	0	0	0	0	0	0	0	0	0	0	0	0	0	0	0	0	0	0.000	0.000	0.000	0.000	0.000	0.000
17	3	4	heat shock 70kDa protein 1A	P000440	3925	24284	400	13622	13764	668	12850	12928	695	63	18	0	0	0	0	0	0	0	0	0	0	0	0	0	0	0	0	0	0	0	0	0	0	0	0	0	0	0	0	0.000	0.000	0.000	0.000	0.000	0.000
17	4	4	heat shock 70kDa protein 1A	P000440	4522	24284	400	14392	14309	1080	13622	13965	2992	0	0	0	0	0	0	0	0	0	0	0	0	0	0	0	0	0	0	0	0	0	0	0	0	0	0	0	0	0	0	0.000	0.000	0.000	0.000	0.000	0.000
17	5	4	MAD; mothers against decapentaplegic homolog 9 (Drosophila)	P000549	5120	24284	400	15420	15244	1462	13364	13946	3858	0	0	0	0	0	0	0	0	0	0	0	0	0	0	0	0	0	0	0	0	0	0	0	0	0	0	0	0	0	0	0.000	0.000	0.000	0.000	0.000	0.000
17	6	4	MAD; mothers against decapentaplegic homolog 9 (Drosophila)	P000549	5717	24284	400	14906	15220	1918	13364	13363	787	77	44	0	0	0	0	0	0	0	0	0	0	0	0	0	0	0	0	0	0	0	0	0	0	0	0	0	0	0	0	0.000	0.000	0.000	0.000	0.000	0.000
17	1	5	MAD; mothers against decapentaplegic homolog 9 (Drosophila)	P000549	2730	25037	400	14136	14017	1143	12336	12111	796	70	50	0	0	0	0	0	0	0	0	0	0	0	0	0	0	0	0	0	0	0	0	0	0	0	0	0	0	0	0	0.000	0.000	0.000	0.000	0.000	0.000
17	2	5	MAD; mothers against decapentaplegic homolog 9 (Drosophila)	P000549	3327	25037	400	14136	14257	1531	12850	12770	746	74	40	0	0	0	0	0	0	0	0	0	0	0	0	0	0	0	0	0	0	0	0	0	0	0	0	0	0	0	0	0.000	0.000	0.000	0.000	0.000	0.000
17	3	5	Buffer	n/a	3925	25037	400	13108	13116	620	13622	13803	1074	0	0	0	0	0	0	0	0	0	0	0	0	0	0	0	0	0	0	0	0	0	0	0	0	0	0	0	0	0	0	0.000	0.000	0.000	0.000	0.000	0.000
17	4	5	Buffer	n/a	4522	25037	400	13364	13643	834	13878	14053	1578	0	0	0	0	0	0	0	0	0	0	0	0	0	0	0	0	0	0	0	0	0	0	0	0	0	0	0	0	0	0	0.000	0.000	0.000	0.000	0.000	0.000
17	5	5	Buffer	n/a	5120	25037	400	13364	13397	381	13364	14029	1923	0	0	0	0	0	0	0	0	0	0	0	0	0	0	0	0	0	0	0	0	0	0	0	0	0	0	0	0	0	0	0.000	0.000	0.000	0.000	0.000	0.000
17	6	5	Buffer	n/a	5717	25037	400	12594	12643	774	12594	12890	831	17	0	0	0	0	0	0	0	0	0	0	0	0	0	0	0	0	0	0	0	0	0	0	0	0	0	0	0	0	0	0.000	0.000	0.000	0.000	0.000	0.000
18	1	1	BCCP-Myc5	n/a	6364	22023	400	13364	13736	1737	12850	12906	880	34	12	0	0	0	0	0	0	0	0	0	0	0	0	0	0	0	0	0	0	0	0	0	0	0	0	0	0	0	0	0.000	0.000	0.000	0.000	0.000	0.000
18	2	1	BCCP-Myc5	n/a	6961	22023	400	13108	13026	503	12080	12313	848	52	9	0	0	0	0	0	0	0	0	0	0	0	0	0	0	0	0	0	0	0	0	0	0	0	0	0	0	0	0	0.000	0.000	0.000	0.000	0.000	0.000
18	3	1	empty	empty	7559	22023	400	11822	11856	576	11822	12005	994	12	0	0	0	0	0	0	0	0	0	0	0	0	0	0	0	0	0	0	0	0	0	0	0	0	0	0	0	0	0	0.000	0.000	0.000	0.000	0.000	0.000
18	4	1	empty	empty	8156	22023	400	11308	11363	675	11566	11809	907	6	0	0	0	0	0	0	0	0	0	0	0	0	0	0	0	0	0	0	0	0	0	0	0	0	0	0	0	0	0	0.000	0.000	0.000	0.000	0.000	0.000
18	5	1	empty	empty	8754	22023	400	12080	12249	928	12080	13250	4035	0	0	0	0	0	0	0	0	0	0	0	0	0	0	0	0	0	0	0	0	0	0	0	0	0	0	0	0	0	0	0.000	0.000	0.000	0.000	0.000	0.000
18	6	1	empty	empty	9351	22023	400	11308	11447	540	11052	11864	3046	0	0	0	0	0	0	0	0	0	0	0	0	0	0	0	0	0	0	0	0	0	0	0	0	0	0	0	0	0	0	0.000	0.000	0.000	0.000	0.000	0.000
18	1	2	FYN oncogene related to SRC; FGR; YES; transcript variant 3	P000031	6364	22777	400	14136	13961	1086	12336	13993	5550	0	0	0	0	0	0	0	0	0	0	0	0	0	0	0	0	0	0	0	0	0	0	0	0	0	0	0	0	0	0	0.000	0.000	0.000	0.000	0.000	0.000
18	2	2	FYN oncogene related to SRC; FGR; YES; transcript variant 3	P000031	6961	22777	400	13878	13965	1668	12080	12152	516	74	65	0	0	0	0	0	0	0	0	0	0	0	0	0	0	0	0	0	0	0	0	0	0	0	0	0	0	0	0	0.000	0.000	0.000	0.000	0.000	0.000
18	3	2	FYN oncogene related to SRC; FGR; YES; transcript variant 3	P000031	7559	22777	400	14392	14699	2106	12080	12180	593	83	72	0	0	0	0	0	0	0	0	0	0	0	0	0	0	0	0	0	0	0	0	0	0	0	0	0	0	0	0	0.000	0.000	0.000	0.000	0.000	0.000
18	4	2	FYN oncogene related to SRC; FGR; YES; transcript variant 3	P000031	8156	22777	400	12594	13977	3872	11822	12167	1545	31	23	0	0	0	0	0	0	0	0	0	0	0	0	0	0	0	0	0	0	0	0	0	0	0	0	0	0	0	0	0.000	0.000	0.000	0.000	0.000	0.000
18	5	2	peroxisome proliferative activated receptor; gamma; transcript variant 3	P000133	8754	22777	400	13108	13286	1592	11822	12003	1709	23	10	0	0	0	0	0	0	0	0	0	0	0	0	0	0	0	0	0	0	0	0	0	0	0	0	0	0	0	0	0.000	0.000	0.000	0.000	0.000	0.000
18	6	2	peroxisome proliferative activated receptor; gamma; transcript variant 3	P000133	9351	22777	400	13364	13655	1824	11566	12294	2457	23	6	0	0	0	0	0	0	0	0	0	0	0	0	0	0	0	0	0	0	0	0	0	0	0	0	0	0	0	0	0.000	0.000	0.000	0.000	0.000	0.000
18	1	3	peroxisome proliferative activated receptor; gamma; transcript variant 3	P000133	6364	23530	400	15420	15309	1039	13108	13896	3151	17	0	0	0	0	0	0	0	0	0	0	0	0	0	0	0	0	0	0	0	0	0	0	0	0	0	0	0	0	0	0.000	0.000	0.000	0.000	0.000	0.000
18	2	3	peroxisome proliferative activated receptor; gamma; transcript variant 3	P000133	6961	23530	400	14136	14292	1068	12336	12333	722	88	67	0	0	0	0	0	0	0	0	0	0	0	0	0	0	0	0	0	0	0	0	0	0	0	0	0	0	0	0	0.000	0.000	0.000	0.000	0.000	0.000
18	3	3	eukaryotic translation elongation factor 1 alpha 1	P000316	7559	23530	400	13364	13709	1712	12336	12346	1384	32	16	0	0	0	0	0	0	0	0	0	0	0	0	0	0	0	0	0	0	0	0	0	0	0	0	0	0	0	0	0.000	0.000	0.000	0.000	0.000	0.000
18	4	3	eukaryotic translation elongation factor 1 alpha 1	P000316	8156	23530	400	12850	13114	1474	12080	12171	1424	26	12	0	0	0	0	0	0	0	0	0	0	0	0	0	0	0	0	0	0	0	0	0	0	0	0	0	0	0	0	0.000	0.000	0.000	0.000	0.000	0.000
18	5	3	eukaryotic translation elongation factor 1 alpha 1	P000316	8754	23530	400	13108	13466	2508	11566	11971	2123	29	10	0	0	0	0	0	0	0	0	0	0	0	0	0	0	0	0	0	0	0	0	0	0	0	0	0	0	0	0	0.000	0.000	0.000	0.000	0.000	0.000
18	6	3	eukaryotic translation elongation factor 1 alpha 1	P000316	9351	23530	400	13108	13649	2435	11566	14073	5679	8	2	0	0	0	0	0	0	0	0	0	0	0	0	0	0	0	0	0	0	0	0	0	0	0	0	0	0	0	0	0.000	0.000	0.000	0.000	0.000	0.000
18	1	4	enolase 1; (alpha)	P000421	6364	24284	400	14392	14189	1392	12850	12831	842	67	47	0	0	0	0	0	0	0	0	0	0	0	0	0	0	0	0	0	0	0	0	0	0	0	0	0	0	0	0	0.000	0.000	0.000	0.000	0.000	0.000
18	2	4	enolase 1; (alpha)	P000421	6961	24284	400	13622	13706	1444	12336	12616	1794	40	6	0	0	0	0	0	0	0	0	0	0	0	0	0	0	0	0	0	0	0	0	0	0	0	0	0	0	0	0	0.000	0.000	0.000	0.000	0.000	0.000
18	3	4	enolase 1; (alpha)	P000421	7559	24284	400	12594	12795	1324	12080	12635	2656	4	2	0	0	0	0	0	0	0	0	0	0	0	0	0	0	0	0	0	0	0	0	0	0	0	0	0	0	0	0	0.000	0.000	0.000	0.000	0.000	0.000
18	4	4	enolase 1; (alpha)	P000421	8156	24284	400	12080	12021	683	11822	11744	870	13	0	0	0	0	0	0	0	0	0	0	0	0	0	0	0	0	0	0	0	0	0	0	0	0	0	0	0	0	0	0.000	0.000	0.000	0.000	0.000	0.000
18	5	4	HUS1 checkpoint homolog (S. pombe)	P000516	8754	24284	400	12465	12376	1048	11822	12224	2249	4	0	0	0	0	0	0	0	0	0	0	0	0	0	0	0	0	0	0	0	0	0	0	0	0	0	0	0	0	0	0.000	0.000	0.000	0.000	0.000	0.000
18	6	4	HUS1 checkpoint homolog (S. pombe)	P000516	9351	24284	400	12594	13265	2263	11308	11470	1182	53	28	0	0	0	0	0	0	0	0	0	0	0	0	0	0	0	0	0	0	0	0	0	0	0	0	0	0	0	0	0.000	0.000	0.000	0.000	0.000	0.000
18	1	5	HUS1 checkpoint homolog (S. pombe)	P000516	6364	25037	400	13878	13595	1159	13108	13103	1087	39	0	0	0	0	0	0	0	0	0	0	0	0	0	0	0	0	0	0	0	0	0	0	0	0	0	0	0	0	0	0.000	0.000	0.000	0.000	0.000	0.000
18	2	5	HUS1 checkpoint homolog (S. pombe)	P000516	6961	25037	400	13108	13616	1478	12594	12448	895	35	24	0	0	0	0	0	0	0	0	0	0	0	0	0	0	0	0	0	0	0	0	0	0	0	0	0	0	0	0	0.000	0.000	0.000	0.000	0.000	0.000
18	3	5	G protein-coupled receptor kinase 6	P001112	7559	25037	400	12080	12238	871	11822	12039	1192	21	0	0	0	0	0	0	0	0	0	0	0	0	0	0	0	0	0	0	0	0	0	0	0	0	0	0	0	0	0	0.000	0.000	0.000	0.000	0.000	0.000
18	4	5	G protein-coupled receptor kinase 6	P001112	8156	25037	400	12594	14060	5065	11308	11429	727	60	48	0	0	0	0	0	0	0	0	0	0	0	0	0	0	0	0	0	0	0	0	0	0	0	0	0	0	0	0	0.000	0.000	0.000	0.000	0.000	0.000
18	5	5	G protein-coupled receptor kinase 6	P001112	8754	25037	400	11822	11692	695	11822	12457	2022	0	0	0	0	0	0	0	0	0	0	0	0	0	0	0	0	0	0	0	0	0	0	0	0	0	0	0	0	0	0	0.000	0.000	0.000	0.000	0.000	0.000
18	6	5	G protein-coupled receptor kinase 6	P001112	9351	25037	400	11822	11516	1405	11308	11603	1367	24	2	0	0	0	0	0	0	0	0	0	0	0	0	0	0	0	0	0	0	0	0	0	0	0	0	0	0	0	0	0.000	0.000	0.000	0.000	0.000	0.000
19	1	1	Phosphopeptide5	empty	9974	22071	400	11052	11051	896	11052	12577	5598	0	0	0	0	0	0	0	0	0	0	0	0	0	0	0	0	0	0	0	0	0	0	0	0	0	0	0	0	0	0	0.000	0.000	0.000	0.000	0.000	0.000
19	2	1	Phosphopeptide5	empty	10571	22071	400	11052	11387	1440	11052	11221	636	29	19	0	0	0	0	0	0	0	0	0	0	0	0	0	0	0	0	0	0	0	0	0	0	0	0	0	0	0	0	0.000	0.000	0.000	0.000	0.000	0.000
19	3	1	empty	empty	11169	22071	400	11052	10995	555	10794	10873	691	23	1	0	0	0	0	0	0	0	0	0	0	0	0	0	0	0	0	0	0	0	0	0	0	0	0	0	0	0	0	0.000	0.000	0.000	0.000	0.000	0.000
19	4	1	empty	empty	11766	22071	400	11052	10965	810	10794	11006	837	22	3	0	0	0	0	0	0	0	0	0	0	0	0	0	0	0	0	0	0	0	0	0	0	0	0	0	0	0	0	0.000	0.000	0.000	0.000	0.000	0.000
19	5	1	empty	empty	12364	22071	400	10280	10568	1200	10794	11232	2243	6	0	0	0	0	0	0	0	0	0	0	0	0	0	0	0	0	0	0	0	0	0	0	0	0	0	0	0	0	0	0.000	0.000	0.000	0.000	0.000	0.000
19	6	1	empty	empty	12961	22071	400	10538	10571	579	11052	10890	1237	0	0	0	0	0	0	0	0	0	0	0	0	0	0	0	0	0	0	0	0	0	0	0	0	0	0	0	0	0	0	0.000	0.000	0.000	0.000	0.000	0.000
19	1	2	BMX non-receptor tyrosine kinase	P000012	9974	22825	400	12594	12623	1118	11566	12012	1785	27	2	0	0	0	0	0	0	0	0	0	0	0	0	0	0	0	0	0	0	0	0	0	0	0	0	0	0	0	0	0.000	0.000	0.000	0.000	0.000	0.000
19	2	2	BMX non-receptor tyrosine kinase	P000012	10571	22825	400	12336	12459	931	11308	12022	1502	38	4	0	0	0	0	0	0	0	0	0	0	0	0	0	0	0	0	0	0	0	0	0	0	0	0	0	0	0	0	0.000	0.000	0.000	0.000	0.000	0.000
19	3	2	BMX non-receptor tyrosine kinase	P000012	11169	22825	400	12594	12447	995	11566	12102	2640	1	0	0	0	0	0	0	0	0	0	0	0	0	0	0	0	0	0	0	0	0	0	0	0	0	0	0	0	0	0	0.000	0.000	0.000	0.000	0.000	0.000
19	4	2	BMX non-receptor tyrosine kinase	P000012	11766	22825	400	12080	12178	1139	10280	10334	641	88	74	0	0	0	0	0	0	0	0	0	0	0	0	0	0	0	0	0	0	0	0	0	0	0	0	0	0	0	0	0.000	0.000	0.000	0.000	0.000	0.000
19	5	2	mitogen-activated protein kinase 1; transcript variant 2	P000094	12364	22825	400	15678	15014	2277	10538	10776	808	93	83	0	0	0	0	0	0	0	0	0	0	0	0	0	0	0	0	0	0	0	0	0	0	0	0	0	0	0	0	0.000	0.000	0.000	0.000	0.000	0.000
19	6	2	mitogen-activated protein kinase 1; transcript variant 2	P000094	12961	22825	400	15164	15222	2235	10538	10776	1205	98	78	0	0	0	0	0	0	0	0	0	0	0	0	0	0	0	0	0	0	0	0	0	0	0	0	0	0	0	0	0.000	0.000	0.000	0.000	0.000	0.000
19	1	3	mitogen-activated protein kinase 1; transcript variant 2	P000094	9974	23578	400	15164	14426	2254	11437	11661	1302	69	59	0	0	0	0	0	0	0	0	0	0	0	0	0	0	0	0	0	0	0	0	0	0	0	0	0	0	0	0	0.000	0.000	0.000	0.000	0.000	0.000
19	2	3	mitogen-activated protein kinase 1; transcript variant 2	P000094	10571	23578	400	14136	13817	1716	11052	11660	1613	71	48	0	0	0	0	0	0	0	0	0	0	0	0	0	0	0	0	0	0	0	0	0	0	0	0	0	0	0	0	0.000	0.000	0.000	0.000	0.000	0.000
19	3	3	dishevelled; dsh homolog 2 (Drosophila)	P000301	11169	23578	400	11566	11469	992	10794	11468	2904	0	0	0	0	0	0	0	0	0	0	0	0	0	0	0	0	0	0	0	0	0	0	0	0	0	0	0	0	0	0	0.000	0.000	0.000	0.000	0.000	0.000
19	4	3	dishevelled; dsh homolog 2 (Drosophila)	P000301	11766	23578	400	11822	11754	876	10538	10648	865	63	29	0	0	0	0	0	0	0	0	0	0	0	0	0	0	0	0	0	0	0	0	0	0	0	0	0	0	0	0	0.000	0.000	0.000	0.000	0.000	0.000
19	5	3	dishevelled; dsh homolog 2 (Drosophila)	P000301	12364	23578	400	12080	13390	3822	11052	11082	587	63	45	0	0	0	0	0	0	0	0	0	0	0	0	0	0	0	0	0	0	0	0	0	0	0	0	0	0	0	0	0.000	0.000	0.000	0.000	0.000	0.000
19	6	3	dishevelled; dsh homolog 2 (Drosophila)	P000301	12961	23578	400	11308	11170	787	10794	10774	802	26	5	0	0	0	0	0	0	0	0	0	0	0	0	0	0	0	0	0	0	0	0	0	0	0	0	0	0	0	0	0.000	0.000	0.000	0.000	0.000	0.000
19	1	4	beta-transducin repeat containing; transcript variant 1	P000389	9974	24332	400	12336	13023	2261	10666	10761	1171	70	30	0	0	0	0	0	0	0	0	0	0	0	0	0	0	0	0	0	0	0	0	0	0	0	0	0	0	0	0	0.000	0.000	0.000	0.000	0.000	0.000
19	2	4	beta-transducin repeat containing; transcript variant 1	P000389	10571	24332	400	12080	12602	2000	10538	10531	733	79	57	0	0	0	0	0	0	0	0	0	0	0	0	0	0	0	0	0	0	0	0	0	0	0	0	0	0	0	0	0.000	0.000	0.000	0.000	0.000	0.000
19	3	4	beta-transducin repeat containing; transcript variant 1	P000389	11169	24332	400	11566	12113	1514	10538	10768	775	56	38	0	0	0	0	0	0	0	0	0	0	0	0	0	0	0	0	0	0	0	0	0	0	0	0	0	0	0	0	0.000	0.000	0.000	0.000	0.000	0.000
19	4	4	beta-transducin repeat containing; transcript variant 1	P000389	11766	24332	400	11308	11429	690	10794	13538	7877	0	0	0	0	0	0	0	0	0	0	0	0	0	0	0	0	0	0	0	0	0	0	0	0	0	0	0	0	0	0	0.000	0.000	0.000	0.000	0.000	0.000
19	5	4	cell division cycle 25A	P000493	12364	24332	400	11308	11521	951	11052	12328	5364	0	0	0	0	0	0	0	0	0	0	0	0	0	0	0	0	0	0	0	0	0	0	0	0	0	0	0	0	0	0	0.000	0.000	0.000	0.000	0.000	0.000
19	6	4	cell division cycle 25A	P000493	12961	24332	400	11566	11445	925	11308	11453	1195	12	1	0	0	0	0	0	0	0	0	0	0	0	0	0	0	0	0	0	0	0	0	0	0	0	0	0	0	0	0	0.000	0.000	0.000	0.000	0.000	0.000
19	1	5	cell division cycle 25A	P000493	9974	25085	400	11566	11516	809	11308	11754	2095	1	0	0	0	0	0	0	0	0	0	0	0	0	0	0	0	0	0	0	0	0	0	0	0	0	0	0	0	0	0	0.000	0.000	0.000	0.000	0.000	0.000
19	2	5	cell division cycle 25A	P000493	10571	25085	400	10794	10705	884	11308	11264	481	16	4	0	0	0	0	0	0	0	0	0	0	0	0	0	0	0	0	0	0	0	0	0	0	0	0	0	0	0	0	0.000	0.000	0.000	0.000	0.000	0.000
19	3	5	vascular endothelial growth factor B	P000805	11169	25085	400	11566	11590	1121	11052	11531	1504	19	2	0	0	0	0	0	0	0	0	0	0	0	0	0	0	0	0	0	0	0	0	0	0	0	0	0	0	0	0	0.000	0.000	0.000	0.000	0.000	0.000
19	4	5	vascular endothelial growth factor B	P000805	11766	25085	400	11308	11248	872	10538	10695	1556	13	0	0	0	0	0	0	0	0	0	0	0	0	0	0	0	0	0	0	0	0	0	0	0	0	0	0	0	0	0	0.000	0.000	0.000	0.000	0.000	0.000
19	5	5	vascular endothelial growth factor B	P000805	12364	25085	400	11052	10875	1142	10024	10166	1440	35	0	0	0	0	0	0	0	0	0	0	0	0	0	0	0	0	0	0	0	0	0	0	0	0	0	0	0	0	0	0.000	0.000	0.000	0.000	0.000	0.000
19	6	5	vascular endothelial growth factor B	P000805	12961	25085	400	11052	11192	911	10538	10759	1235	23	5	0	0	0	0	0	0	0	0	0	0	0	0	0	0	0	0	0	0	0	0	0	0	0	0	0	0	0	0	0.000	0.000	0.000	0.000	0.000	0.000
20	1	1	Cy5/Cy3 labeled biotin-BSA marker proteins	n/a	13557	22023	400	11052	10898	615	10024	10121	629	70	33	0	0	0	0	0	0	0	0	0	0	0	0	0	0	0	0	0	0	0	0	0	0	0	0	0	0	0	0	0.000	0.000	0.000	0.000	0.000	0.000
20	2	1	Cy5/Cy3 labeled biotin-BSA marker proteins	n/a	14154	22023	400	10538	11862	2908	10538	10407	431	35	32	0	0	0	0	0	0	0	0	0	0	0	0	0	0	0	0	0	0	0	0	0	0	0	0	0	0	0	0	0.000	0.000	0.000	0.000	0.000	0.000
20	3	1	empty	empty	14752	22023	400	10794	11119	1004	10794	11155	1124	18	9	0	0	0	0	0	0	0	0	0	0	0	0	0	0	0	0	0	0	0	0	0	0	0	0	0	0	0	0	0.000	0.000	0.000	0.000	0.000	0.000
20	4	1	empty	empty	15349	22023	400	11566	11634	584	11566	11734	834	8	0	0	0	0	0	0	0	0	0	0	0	0	0	0	0	0	0	0	0	0	0	0	0	0	0	0	0	0	0	0.000	0.000	0.000	0.000	0.000	0.000
20	5	1	empty	empty	15947	22023	400	11822	11743	529	11822	12350	1486	1	0	0	0	0	0	0	0	0	0	0	0	0	0	0	0	0	0	0	0	0	0	0	0	0	0	0	0	0	0	0.000	0.000	0.000	0.000	0.000	0.000
20	6	1	empty	empty	16544	22023	400	11822	11823	504	11566	11780	1080	3	0	0	0	0	0	0	0	0	0	0	0	0	0	0	0	0	0	0	0	0	0	0	0	0	0	0	0	0	0	0.000	0.000	0.000	0.000	0.000	0.000
20	1	2	Buffer	n/a	13557	22777	400	10794	10745	1352	10280	10254	568	42	29	0	0	0	0	0	0	0	0	0	0	0	0	0	0	0	0	0	0	0	0	0	0	0	0	0	0	0	0	0.000	0.000	0.000	0.000	0.000	0.000
20	2	2	Buffer	n/a	14154	22777	400	11052	11408	1722	10538	10628	587	46	29	0	0	0	0	0	0	0	0	0	0	0	0	0	0	0	0	0	0	0	0	0	0	0	0	0	0	0	0	0.000	0.000	0.000	0.000	0.000	0.000
20	3	2	Buffer	n/a	14752	22777	400	10794	10896	416	10538	10606	788	8	0	0	0	0	0	0	0	0	0	0	0	0	0	0	0	0	0	0	0	0	0	0	0	0	0	0	0	0	0	0.000	0.000	0.000	0.000	0.000	0.000
20	4	2	Buffer	n/a	15349	22777	400	11566	11460	704	12080	12070	1244	1	0	0	0	0	0	0	0	0	0	0	0	0	0	0	0	0	0	0	0	0	0	0	0	0	0	0	0	0	0	0.000	0.000	0.000	0.000	0.000	0.000
20	5	2	casein kinase 2; alpha prime polypeptide	P000078	15947	22777	400	13108	13019	752	11822	12000	945	66	17	0	0	0	0	0	0	0	0	0	0	0	0	0	0	0	0	0	0	0	0	0	0	0	0	0	0	0	0	0.000	0.000	0.000	0.000	0.000	0.000
20	6	2	casein kinase 2; alpha prime polypeptide	P000078	16544	22777	400	13364	12906	1249	11566	11633	580	70	62	0	0	0	0	0	0	0	0	0	0	0	0	0	0	0	0	0	0	0	0	0	0	0	0	0	0	0	0	0.000	0.000	0.000	0.000	0.000	0.000
20	1	3	casein kinase 2; alpha prime polypeptide	P000078	13557	23530	400	14136	13527	1505	10538	10608	857	86	80	0	0	0	0	0	0	0	0	0	0	0	0	0	0	0	0	0	0	0	0	0	0	0	0	0	0	0	0	0.000	0.000	0.000	0.000	0.000	0.000
20	2	3	casein kinase 2; alpha prime polypeptide	P000078	14154	23530	400	13108	13493	2298	10538	10631	492	85	78	0	0	0	0	0	0	0	0	0	0	0	0	0	0	0	0	0	0	0	0	0	0	0	0	0	0	0	0	0.000	0.000	0.000	0.000	0.000	0.000
20	3	3	histone 1; H4i	P000257	14752	23530	400	11566	13463	3925	11052	11049	918	39	31	0	0	0	0	0	0	0	0	0	0	0	0	0	0	0	0	0	0	0	0	0	0	0	0	0	0	0	0	0.000	0.000	0.000	0.000	0.000	0.000
20	4	3	histone 1; H4i	P000257	15349	23530	400	12080	11768	1039	11566	11654	1025	32	0	0	0	0	0	0	0	0	0	0	0	0	0	0	0	0	0	0	0	0	0	0	0	0	0	0	0	0	0	0.000	0.000	0.000	0.000	0.000	0.000
20	5	3	histone 1; H4i	P000257	15947	23530	400	12080	12174	405	11822	12092	1205	3	0	0	0	0	0	0	0	0	0	0	0	0	0	0	0	0	0	0	0	0	0	0	0	0	0	0	0	0	0	0.000	0.000	0.000	0.000	0.000	0.000
20	6	3	histone 1; H4i	P000257	16544	23530	400	12850	12636	916	11822	12065	1386	29	0	0	0	0	0	0	0	0	0	0	0	0	0	0	0	0	0	0	0	0	0	0	0	0	0	0	0	0	0	0.000	0.000	0.000	0.000	0.000	0.000
20	1	4	mitogen-activated protein kinase 6	P000359	13557	24284	400	11052	11048	975	11308	11339	823	10	3	0	0	0	0	0	0	0	0	0	0	0	0	0	0	0	0	0	0	0	0	0	0	0	0	0	0	0	0	0.000	0.000	0.000	0.000	0.000	0.000
20	2	4	mitogen-activated protein kinase 6	P000359	14154	24284	400	11052	11076	575	10794	10899	683	32	0	0	0	0	0	0	0	0	0	0	0	0	0	0	0	0	0	0	0	0	0	0	0	0	0	0	0	0	0	0.000	0.000	0.000	0.000	0.000	0.000
20	3	4	mitogen-activated protein kinase 6	P000359	14752	24284	400	11308	11229	874	11052	10983	859	22	2	0	0	0	0	0	0	0	0	0	0	0	0	0	0	0	0	0	0	0	0	0	0	0	0	0	0	0	0	0.000	0.000	0.000	0.000	0.000	0.000
20	4	4	mitogen-activated protein kinase 6	P000359	15349	24284	400	11308	11520	791	11308	11262	691	25	10	0	0	0	0	0	0	0	0	0	0	0	0	0	0	0	0	0	0	0	0	0	0	0	0	0	0	0	0	0.000	0.000	0.000	0.000	0.000	0.000
20	5	4	cyclin-dependent kinase inhibitor 2D (p19; inhibits CDK4)	P000470	15947	24284	400	12080	12031	536	11566	11597	735	38	2	0	0	0	0	0	0	0	0	0	0	0	0	0	0	0	0	0	0	0	0	0	0	0	0	0	0	0	0	0.000	0.000	0.000	0.000	0.000	0.000
20	6	4	cyclin-dependent kinase inhibitor 2D (p19; inhibits CDK4)	P000470	16544	24284	400	12080	12217	1061	11308	11893	2108	14	0	0	0	0	0	0	0	0	0	0	0	0	0	0	0	0	0	0	0	0	0	0	0	0	0	0	0	0	0	0.000	0.000	0.000	0.000	0.000	0.000
20	1	5	cyclin-dependent kinase inhibitor 2D (p19; inhibits CDK4)	P000470	13557	25037	400	11308	11154	784	10538	11010	1923	0	0	0	0	0	0	0	0	0	0	0	0	0	0	0	0	0	0	0	0	0	0	0	0	0	0	0	0	0	0	0.000	0.000	0.000	0.000	0.000	0.000
20	2	5	cyclin-dependent kinase inhibitor 2D (p19; inhibits CDK4)	P000470	14154	25037	400	11308	11901	1499	10794	11892	2664	15	3	0	0	0	0	0	0	0	0	0	0	0	0	0	0	0	0	0	0	0	0	0	0	0	0	0	0	0	0	0.000	0.000	0.000	0.000	0.000	0.000
20	3	5	guanine nucleotide binding protein (G protein); gamma 2	P000571	14752	25037	400	11566	11444	673	10794	11269	1548	5	0	0	0	0	0	0	0	0	0	0	0	0	0	0	0	0	0	0	0	0	0	0	0	0	0	0	0	0	0	0.000	0.000	0.000	0.000	0.000	0.000
20	4	5	guanine nucleotide binding protein (G protein); gamma 2	P000571	15349	25037	400	11052	12247	4308	11308	11745	1800	14	12	0	0	0	0	0	0	0	0	0	0	0	0	0	0	0	0	0	0	0	0	0	0	0	0	0	0	0	0	0.000	0.000	0.000	0.000	0.000	0.000
20	5	5	guanine nucleotide binding protein (G protein); gamma 2	P000571	15947	25037	400	11308	11446	988	11052	11274	914	29	4	0	0	0	0	0	0	0	0	0	0	0	0	0	0	0	0	0	0	0	0	0	0	0	0	0	0	0	0	0.000	0.000	0.000	0.000	0.000	0.000
20	6	5	guanine nucleotide binding protein (G protein); gamma 2	P000571	16544	25037	400	12080	12862	2472	11566	12053	2013	22	14	0	0	0	0	0	0	0	0	0	0	0	0	0	0	0	0	0	0	0	0	0	0	0	0	0	0	0	0	0.000	0.000	0.000	0.000	0.000	0.000
21	1	1	Cy5/Cy3 labeled biotin-BSA marker proteins	n/a	2779	25606	400	12594	12702	790	12336	12352	656	31	11	0	0	0	0	0	0	0	0	0	0	0	0	0	0	0	0	0	0	0	0	0	0	0	0	0	0	0	0	0.000	0.000	0.000	0.000	0.000	0.000
21	2	1	Cy5/Cy3 labeled biotin-BSA marker proteins	n/a	3376	25606	400	13108	13243	651	13108	13643	1992	0	0	0	0	0	0	0	0	0	0	0	0	0	0	0	0	0	0	0	0	0	0	0	0	0	0	0	0	0	0	0.000	0.000	0.000	0.000	0.000	0.000
21	3	1	empty	empty	3974	25606	400	13108	13424	1122	13622	13773	667	13	5	0	0	0	0	0	0	0	0	0	0	0	0	0	0	0	0	0	0	0	0	0	0	0	0	0	0	0	0	0.000	0.000	0.000	0.000	0.000	0.000
21	4	1	empty	empty	4571	25606	400	13622	14952	4350	13622	13573	704	32	23	0	0	0	0	0	0	0	0	0	0	0	0	0	0	0	0	0	0	0	0	0	0	0	0	0	0	0	0	0.000	0.000	0.000	0.000	0.000	0.000
21	5	1	empty	empty	5169	25606	400	13622	14009	1765	14392	14495	2029	5	3	0	0	0	0	0	0	0	0	0	0	0	0	0	0	0	0	0	0	0	0	0	0	0	0	0	0	0	0	0.000	0.000	0.000	0.000	0.000	0.000
21	6	1	empty	empty	5766	25606	400	12850	12725	498	12594	12609	756	15	0	0	0	0	0	0	0	0	0	0	0	0	0	0	0	0	0	0	0	0	0	0	0	0	0	0	0	0	0	0.000	0.000	0.000	0.000	0.000	0.000
21	1	2	casein kinase 1; gamma 2	P000053	2779	26360	400	15420	15094	1019	12594	12741	564	95	85	0	0	0	0	0	0	0	0	0	0	0	0	0	0	0	0	0	0	0	0	0	0	0	0	0	0	0	0	0.000	0.000	0.000	0.000	0.000	0.000
21	2	2	casein kinase 1; gamma 2	P000053	3376	26360	400	16192	16675	2201	12594	12536	781	100	98	0	0	0	0	0	0	0	0	0	0	0	0	0	0	0	0	0	0	0	0	0	0	0	0	0	0	0	0	0.000	0.000	0.000	0.000	0.000	0.000
21	3	2	casein kinase 1; gamma 2	P000053	3974	26360	400	16448	16277	821	13108	13384	757	99	97	0	0	0	0	0	0	0	0	0	0	0	0	0	0	0	0	0	0	0	0	0	0	0	0	0	0	0	0	0.000	0.000	0.000	0.000	0.000	0.000
21	4	2	casein kinase 1; gamma 2	P000053	4571	26360	400	15678	15398	783	13364	13675	1181	85	37	0	0	0	0	0	0	0	0	0	0	0	0	0	0	0	0	0	0	0	0	0	0	0	0	0	0	0	0	0.000	0.000	0.000	0.000	0.000	0.000
21	5	2	signal transducer and activator of transcription 4	P000184	5169	26360	400	17990	17735	1212	13108	13941	2122	96	64	0	0	0	0	0	0	0	0	0	0	0	0	0	0	0	0	0	0	0	0	0	0	0	0	0	0	0	0	0.000	0.000	0.000	0.000	0.000	0.000
21	6	2	signal transducer and activator of transcription 4	P000184	5766	26360	400	17476	17261	1129	12850	12871	1151	100	95	0	0	0	0	0	0	0	0	0	0	0	0	0	0	0	0	0	0	0	0	0	0	0	0	0	0	0	0	0.000	0.000	0.000	0.000	0.000	0.000
21	1	3	signal transducer and activator of transcription 4	P000184	2779	27113	400	20304	21792	4908	12850	13090	813	100	100	0	0	0	0	0	0	0	0	0	0	0	0	0	0	0	0	0	0	0	0	0	0	0	0	0	0	0	0	0.000	0.000	0.000	0.000	0.000	0.000
21	2	3	signal transducer and activator of transcription 4	P000184	3376	27113	400	18762	18584	996	13108	13114	976	100	100	0	0	0	0	0	0	0	0	0	0	0	0	0	0	0	0	0	0	0	0	0	0	0	0	0	0	0	0	0.000	0.000	0.000	0.000	0.000	0.000
21	3	3	signal transducing adaptor molecule (SH3 domain and ITAM motif) 1	P000340	3974	27113	400	15420	15734	1670	13108	13323	851	90	68	0	0	0	0	0	0	0	0	0	0	0	0	0	0	0	0	0	0	0	0	0	0	0	0	0	0	0	0	0.000	0.000	0.000	0.000	0.000	0.000
21	4	3	signal transducing adaptor molecule (SH3 domain and ITAM motif) 1	P000340	4571	27113	400	16192	18939	6329	13364	13330	761	92	80	0	0	0	0	0	0	0	0	0	0	0	0	0	0	0	0	0	0	0	0	0	0	0	0	0	0	0	0	0.000	0.000	0.000	0.000	0.000	0.000
21	5	3	signal transducing adaptor molecule (SH3 domain and ITAM motif) 1	P000340	5169	27113	400	14136	14120	620	13108	13104	1198	47	0	0	0	0	0	0	0	0	0	0	0	0	0	0	0	0	0	0	0	0	0	0	0	0	0	0	0	0	0	0.000	0.000	0.000	0.000	0.000	0.000
21	6	3	signal transducing adaptor molecule (SH3 domain and ITAM motif) 1	P000340	5766	27113	400	14392	14386	790	12594	13137	2031	43	0	0	0	0	0	0	0	0	0	0	0	0	0	0	0	0	0	0	0	0	0	0	0	0	0	0	0	0	0	0.000	0.000	0.000	0.000	0.000	0.000
21	1	4	inhibitor of DNA binding 1; dominant negative helix-loop-helix protein	P000441	2779	27867	400	15164	15387	1093	12594	12627	659	100	93	0	0	0	0	0	0	0	0	0	0	0	0	0	0	0	0	0	0	0	0	0	0	0	0	0	0	0	0	0.000	0.000	0.000	0.000	0.000	0.000
21	2	4	inhibitor of DNA binding 1; dominant negative helix-loop-helix protein	P000441	3376	27867	400	15678	16045	1720	13364	13417	713	95	76	0	0	0	0	0	0	0	0	0	0	0	0	0	0	0	0	0	0	0	0	0	0	0	0	0	0	0	0	0.000	0.000	0.000	0.000	0.000	0.000
21	3	4	inhibitor of DNA binding 1; dominant negative helix-loop-helix protein	P000441	3974	27867	400	14650	14655	932	12850	12809	561	88	81	0	0	0	0	0	0	0	0	0	0	0	0	0	0	0	0	0	0	0	0	0	0	0	0	0	0	0	0	0.000	0.000	0.000	0.000	0.000	0.000
21	4	4	inhibitor of DNA binding 1; dominant negative helix-loop-helix protein	P000441	4571	27867	400	14136	14344	674	12850	13219	1507	48	3	0	0	0	0	0	0	0	0	0	0	0	0	0	0	0	0	0	0	0	0	0	0	0	0	0	0	0	0	0.000	0.000	0.000	0.000	0.000	0.000
21	5	4	fibroblast growth factor 13; transcript variant 1A	P000550	5169	27867	400	13364	13391	631	12594	13866	3208	0	0	0	0	0	0	0	0	0	0	0	0	0	0	0	0	0	0	0	0	0	0	0	0	0	0	0	0	0	0	0.000	0.000	0.000	0.000	0.000	0.000
21	6	4	fibroblast growth factor 13; transcript variant 1A	P000550	5766	27867	400	13878	14549	2182	12336	12429	859	74	43	0	0	0	0	0	0	0	0	0	0	0	0	0	0	0	0	0	0	0	0	0	0	0	0	0	0	0	0	0.000	0.000	0.000	0.000	0.000	0.000
21	1	5	fibroblast growth factor 13; transcript variant 1A	P000550	2779	28620	400	14392	14295	679	12850	12919	1064	69	11	0	0	0	0	0	0	0	0	0	0	0	0	0	0	0	0	0	0	0	0	0	0	0	0	0	0	0	0	0.000	0.000	0.000	0.000	0.000	0.000
21	2	5	fibroblast growth factor 13; transcript variant 1A	P000550	3376	28620	400	14906	15542	2633	13108	13704	1561	53	12	0	0	0	0	0	0	0	0	0	0	0	0	0	0	0	0	0	0	0	0	0	0	0	0	0	0	0	0	0.000	0.000	0.000	0.000	0.000	0.000
21	3	5	Buffer	n/a	3974	28620	400	13622	15071	4352	12594	13006	1363	37	25	0	0	0	0	0	0	0	0	0	0	0	0	0	0	0	0	0	0	0	0	0	0	0	0	0	0	0	0	0.000	0.000	0.000	0.000	0.000	0.000
21	4	5	Buffer	n/a	4571	28620	400	12850	13011	825	12594	12923	1826	5	0	0	0	0	0	0	0	0	0	0	0	0	0	0	0	0	0	0	0	0	0	0	0	0	0	0	0	0	0	0.000	0.000	0.000	0.000	0.000	0.000
21	5	5	Buffer	n/a	5169	28620	400	12336	12210	700	12336	13088	2209	0	0	0	0	0	0	0	0	0	0	0	0	0	0	0	0	0	0	0	0	0	0	0	0	0	0	0	0	0	0	0.000	0.000	0.000	0.000	0.000	0.000
21	6	5	Buffer	n/a	5766	28620	400	12594	12586	943	11822	12079	1109	32	6	0	0	0	0	0	0	0	0	0	0	0	0	0	0	0	0	0	0	0	0	0	0	0	0	0	0	0	0	0.000	0.000	0.000	0.000	0.000	0.000
22	1	1	BCCP-Myc6	n/a	6388	25582	400	12850	12779	669	12850	13226	1168	6	0	0	0	0	0	0	0	0	0	0	0	0	0	0	0	0	0	0	0	0	0	0	0	0	0	0	0	0	0	0.000	0.000	0.000	0.000	0.000	0.000
22	2	1	BCCP-Myc6	n/a	6985	25582	400	13108	13314	1551	12336	12585	1657	26	11	0	0	0	0	0	0	0	0	0	0	0	0	0	0	0	0	0	0	0	0	0	0	0	0	0	0	0	0	0.000	0.000	0.000	0.000	0.000	0.000
22	3	1	empty	empty	7583	25582	400	11822	12728	2771	11566	11431	675	43	26	0	0	0	0	0	0	0	0	0	0	0	0	0	0	0	0	0	0	0	0	0	0	0	0	0	0	0	0	0.000	0.000	0.000	0.000	0.000	0.000
22	4	1	empty	empty	8180	25582	400	11822	12200	1901	11308	11211	810	27	16	0	0	0	0	0	0	0	0	0	0	0	0	0	0	0	0	0	0	0	0	0	0	0	0	0	0	0	0	0.000	0.000	0.000	0.000	0.000	0.000
22	5	1	empty	empty	8778	25582	400	11566	11590	907	11566	13380	4741	0	0	0	0	0	0	0	0	0	0	0	0	0	0	0	0	0	0	0	0	0	0	0	0	0	0	0	0	0	0	0.000	0.000	0.000	0.000	0.000	0.000
22	6	1	empty	empty	9375	25582	400	11822	11731	593	11052	11182	963	40	0	0	0	0	0	0	0	0	0	0	0	0	0	0	0	0	0	0	0	0	0	0	0	0	0	0	0	0	0	0.000	0.000	0.000	0.000	0.000	0.000
22	1	2	TEK tyrosine kinase; endothelial (venous malformations; multiple cutaneous and mucosal)	P000032	6388	26336	400	13364	13474	914	12336	12967	1909	22	0	0	0	0	0	0	0	0	0	0	0	0	0	0	0	0	0	0	0	0	0	0	0	0	0	0	0	0	0	0.000	0.000	0.000	0.000	0.000	0.000
22	2	2	TEK tyrosine kinase; endothelial (venous malformations; multiple cutaneous and mucosal)	P000032	6985	26336	400	12594	12531	390	11566	11568	898	60	0	0	0	0	0	0	0	0	0	0	0	0	0	0	0	0	0	0	0	0	0	0	0	0	0	0	0	0	0	0.000	0.000	0.000	0.000	0.000	0.000
22	3	2	TEK tyrosine kinase; endothelial (venous malformations; multiple cutaneous and mucosal)	P000032	7583	26336	400	12850	13122	909	11822	12086	1386	38	10	0	0	0	0	0	0	0	0	0	0	0	0	0	0	0	0	0	0	0	0	0	0	0	0	0	0	0	0	0.000	0.000	0.000	0.000	0.000	0.000
22	4	2	TEK tyrosine kinase; endothelial (venous malformations; multiple cutaneous and mucosal)	P000032	8180	26336	400	12080	12415	1117	11566	11562	1013	36	17	0	0	0	0	0	0	0	0	0	0	0	0	0	0	0	0	0	0	0	0	0	0	0	0	0	0	0	0	0.000	0.000	0.000	0.000	0.000	0.000
22	5	2	golgi autoantigen; golgin subfamily a; 5	P000138	8778	26336	400	15934	16708	2665	11308	11777	1920	96	74	0	0	0	0	0	0	0	0	0	0	0	0	0	0	0	0	0	0	0	0	0	0	0	0	0	0	0	0	0.000	0.000	0.000	0.000	0.000	0.000
22	6	2	golgi autoantigen; golgin subfamily a; 5	P000138	9375	26336	400	17990	18916	4027	11308	11385	949	100	99	0	0	0	0	0	0	0	0	0	0	0	0	0	0	0	0	0	0	0	0	0	0	0	0	0	0	0	0	0.000	0.000	0.000	0.000	0.000	0.000
22	1	3	golgi autoantigen; golgin subfamily a; 5	P000138	6388	27089	400	17734	17615	1674	12080	12465	1393	100	94	0	0	0	0	0	0	0	0	0	0	0	0	0	0	0	0	0	0	0	0	0	0	0	0	0	0	0	0	0.000	0.000	0.000	0.000	0.000	0.000
22	2	3	golgi autoantigen; golgin subfamily a; 5	P000138	6985	27089	400	17220	17148	1427	11566	11613	693	100	100	0	0	0	0	0	0	0	0	0	0	0	0	0	0	0	0	0	0	0	0	0	0	0	0	0	0	0	0	0.000	0.000	0.000	0.000	0.000	0.000
22	3	3	v-ets erythroblastosis virus E26 oncogene homolog 2 (avian)	P000318	7583	27089	400	13622	13667	877	11566	11999	1546	67	10	0	0	0	0	0	0	0	0	0	0	0	0	0	0	0	0	0	0	0	0	0	0	0	0	0	0	0	0	0.000	0.000	0.000	0.000	0.000	0.000
22	4	3	v-ets erythroblastosis virus E26 oncogene homolog 2 (avian)	P000318	8180	27089	400	13878	13808	1293	11566	12058	1548	67	18	0	0	0	0	0	0	0	0	0	0	0	0	0	0	0	0	0	0	0	0	0	0	0	0	0	0	0	0	0.000	0.000	0.000	0.000	0.000	0.000
22	5	3	v-ets erythroblastosis virus E26 oncogene homolog 2 (avian)	P000318	8778	27089	400	13364	13309	742	11308	11401	1455	81	11	0	0	0	0	0	0	0	0	0	0	0	0	0	0	0	0	0	0	0	0	0	0	0	0	0	0	0	0	0.000	0.000	0.000	0.000	0.000	0.000
22	6	3	v-ets erythroblastosis virus E26 oncogene homolog 2 (avian)	P000318	9375	27089	400	14136	15246	3293	11566	11557	1027	81	57	0	0	0	0	0	0	0	0	0	0	0	0	0	0	0	0	0	0	0	0	0	0	0	0	0	0	0	0	0.000	0.000	0.000	0.000	0.000	0.000
22	1	4	guanine nucleotide binding protein (G protein); beta polypeptide 1	P000422	6388	27843	400	13364	14165	2324	12080	12128	943	74	31	0	0	0	0	0	0	0	0	0	0	0	0	0	0	0	0	0	0	0	0	0	0	0	0	0	0	0	0	0.000	0.000	0.000	0.000	0.000	0.000
22	2	4	guanine nucleotide binding protein (G protein); beta polypeptide 1	P000422	6985	27843	400	12850	13332	1063	12080	12024	518	68	41	0	0	0	0	0	0	0	0	0	0	0	0	0	0	0	0	0	0	0	0	0	0	0	0	0	0	0	0	0.000	0.000	0.000	0.000	0.000	0.000
22	3	4	guanine nucleotide binding protein (G protein); beta polypeptide 1	P000422	7583	27843	400	12336	12759	1632	11566	11929	1370	20	10	0	0	0	0	0	0	0	0	0	0	0	0	0	0	0	0	0	0	0	0	0	0	0	0	0	0	0	0	0.000	0.000	0.000	0.000	0.000	0.000
22	4	4	guanine nucleotide binding protein (G protein); beta polypeptide 1	P000422	8180	27843	400	12336	12228	714	11822	12255	1586	2	0	0	0	0	0	0	0	0	0	0	0	0	0	0	0	0	0	0	0	0	0	0	0	0	0	0	0	0	0	0.000	0.000	0.000	0.000	0.000	0.000
22	5	4	ras-related C3 botulinum toxin substrate 2 (rho family; small GTP binding protein Rac2)	P000521	8778	27843	400	13364	13271	1304	11566	11720	1292	60	25	0	0	0	0	0	0	0	0	0	0	0	0	0	0	0	0	0	0	0	0	0	0	0	0	0	0	0	0	0.000	0.000	0.000	0.000	0.000	0.000
22	6	4	ras-related C3 botulinum toxin substrate 2 (rho family; small GTP binding protein Rac2)	P000521	9375	27843	400	12594	12668	722	11566	11598	978	57	10	0	0	0	0	0	0	0	0	0	0	0	0	0	0	0	0	0	0	0	0	0	0	0	0	0	0	0	0	0.000	0.000	0.000	0.000	0.000	0.000
22	1	5	ras-related C3 botulinum toxin substrate 2 (rho family; small GTP binding protein Rac2)	P000521	6388	28596	400	15420	19012	9244	11308	11357	1112	97	85	0	0	0	0	0	0	0	0	0	0	0	0	0	0	0	0	0	0	0	0	0	0	0	0	0	0	0	0	0.000	0.000	0.000	0.000	0.000	0.000
22	2	5	ras-related C3 botulinum toxin substrate 2 (rho family; small GTP binding protein Rac2)	P000521	6985	28596	400	13878	13900	613	12080	12197	715	96	72	0	0	0	0	0	0	0	0	0	0	0	0	0	0	0	0	0	0	0	0	0	0	0	0	0	0	0	0	0.000	0.000	0.000	0.000	0.000	0.000
22	3	5	BUB1 budding uninhibited by benzimidazoles 1 homolog beta (yeast)	P001114	7583	28596	400	15934	15975	1486	11566	11608	663	99	96	0	0	0	0	0	0	0	0	0	0	0	0	0	0	0	0	0	0	0	0	0	0	0	0	0	0	0	0	0.000	0.000	0.000	0.000	0.000	0.000
22	4	5	BUB1 budding uninhibited by benzimidazoles 1 homolog beta (yeast)	P001114	8180	28596	400	15420	15326	1197	11822	11810	835	95	91	0	0	0	0	0	0	0	0	0	0	0	0	0	0	0	0	0	0	0	0	0	0	0	0	0	0	0	0	0.000	0.000	0.000	0.000	0.000	0.000
22	5	5	BUB1 budding uninhibited by benzimidazoles 1 homolog beta (yeast)	P001114	8778	28596	400	15678	15919	1956	11308	11343	998	100	95	0	0	0	0	0	0	0	0	0	0	0	0	0	0	0	0	0	0	0	0	0	0	0	0	0	0	0	0	0.000	0.000	0.000	0.000	0.000	0.000
22	6	5	BUB1 budding uninhibited by benzimidazoles 1 homolog beta (yeast)	P001114	9375	28596	400	14906	14904	1053	11052	11051	616	99	98	0	0	0	0	0	0	0	0	0	0	0	0	0	0	0	0	0	0	0	0	0	0	0	0	0	0	0	0	0.000	0.000	0.000	0.000	0.000	0.000
23	1	1	Phosphopeptide6	empty	10023	25582	400	11052	11031	739	11566	13846	5141	0	0	0	0	0	0	0	0	0	0	0	0	0	0	0	0	0	0	0	0	0	0	0	0	0	0	0	0	0	0	0.000	0.000	0.000	0.000	0.000	0.000
23	2	1	Phosphopeptide6	empty	10620	25582	400	11566	11506	529	10794	10840	1224	21	0	0	0	0	0	0	0	0	0	0	0	0	0	0	0	0	0	0	0	0	0	0	0	0	0	0	0	0	0	0.000	0.000	0.000	0.000	0.000	0.000
23	3	1	empty	empty	11218	25582	400	10280	10830	1491	10538	10522	769	26	17	0	0	0	0	0	0	0	0	0	0	0	0	0	0	0	0	0	0	0	0	0	0	0	0	0	0	0	0	0.000	0.000	0.000	0.000	0.000	0.000
23	4	1	empty	empty	11815	25582	400	10280	10199	549	10280	10281	623	6	2	0	0	0	0	0	0	0	0	0	0	0	0	0	0	0	0	0	0	0	0	0	0	0	0	0	0	0	0	0.000	0.000	0.000	0.000	0.000	0.000
23	5	1	empty	empty	12413	25582	400	10538	10369	514	10280	10181	925	1	0	0	0	0	0	0	0	0	0	0	0	0	0	0	0	0	0	0	0	0	0	0	0	0	0	0	0	0	0	0.000	0.000	0.000	0.000	0.000	0.000
23	6	1	empty	empty	13010	25582	400	11308	11256	523	10794	10852	884	20	0	0	0	0	0	0	0	0	0	0	0	0	0	0	0	0	0	0	0	0	0	0	0	0	0	0	0	0	0	0.000	0.000	0.000	0.000	0.000	0.000
23	1	2	lymphocyte-specific protein tyrosine kinase	P000013	10023	26336	400	12080	12340	1356	10794	11166	1550	40	14	0	0	0	0	0	0	0	0	0	0	0	0	0	0	0	0	0	0	0	0	0	0	0	0	0	0	0	0	0.000	0.000	0.000	0.000	0.000	0.000
23	2	2	lymphocyte-specific protein tyrosine kinase	P000013	10620	26336	400	11308	11377	362	10794	10795	718	41	3	0	0	0	0	0	0	0	0	0	0	0	0	0	0	0	0	0	0	0	0	0	0	0	0	0	0	0	0	0.000	0.000	0.000	0.000	0.000	0.000
23	3	2	lymphocyte-specific protein tyrosine kinase	P000013	11218	26336	400	11308	11446	827	10794	10962	945	31	7	0	0	0	0	0	0	0	0	0	0	0	0	0	0	0	0	0	0	0	0	0	0	0	0	0	0	0	0	0.000	0.000	0.000	0.000	0.000	0.000
23	4	2	lymphocyte-specific protein tyrosine kinase	P000013	11815	26336	400	11566	11796	1048	10024	10219	778	77	49	0	0	0	0	0	0	0	0	0	0	0	0	0	0	0	0	0	0	0	0	0	0	0	0	0	0	0	0	0.000	0.000	0.000	0.000	0.000	0.000
23	5	2	ribosomal protein S6 kinase; 90kDa; polypeptide 1	P000095	12413	26336	400	14392	14858	1914	10538	10591	889	100	100	0	0	0	0	0	0	0	0	0	0	0	0	0	0	0	0	0	0	0	0	0	0	0	0	0	0	0	0	0.000	0.000	0.000	0.000	0.000	0.000
23	6	2	ribosomal protein S6 kinase; 90kDa; polypeptide 1	P000095	13010	26336	400	15678	15866	2048	10794	10673	726	100	98	0	0	0	0	0	0	0	0	0	0	0	0	0	0	0	0	0	0	0	0	0	0	0	0	0	0	0	0	0.000	0.000	0.000	0.000	0.000	0.000
23	1	3	ribosomal protein S6 kinase; 90kDa; polypeptide 1	P000095	10023	27089	400	13878	13668	869	11308	11450	1497	83	25	0	0	0	0	0	0	0	0	0	0	0	0	0	0	0	0	0	0	0	0	0	0	0	0	0	0	0	0	0.000	0.000	0.000	0.000	0.000	0.000
23	2	3	ribosomal protein S6 kinase; 90kDa; polypeptide 1	P000095	10620	27089	400	15420	16558	4174	11052	11374	1274	91	76	0	0	0	0	0	0	0	0	0	0	0	0	0	0	0	0	0	0	0	0	0	0	0	0	0	0	0	0	0.000	0.000	0.000	0.000	0.000	0.000
23	3	3	SH2-B homolog	P000302	11218	27089	400	11822	11983	891	11052	11005	733	61	27	0	0	0	0	0	0	0	0	0	0	0	0	0	0	0	0	0	0	0	0	0	0	0	0	0	0	0	0	0.000	0.000	0.000	0.000	0.000	0.000
23	4	3	SH2-B homolog	P000302	11815	27089	400	11308	11570	688	11308	11343	1325	7	1	0	0	0	0	0	0	0	0	0	0	0	0	0	0	0	0	0	0	0	0	0	0	0	0	0	0	0	0	0.000	0.000	0.000	0.000	0.000	0.000
23	5	3	SH2-B homolog	P000302	12413	27089	400	12336	12785	1983	10794	11193	1352	52	25	0	0	0	0	0	0	0	0	0	0	0	0	0	0	0	0	0	0	0	0	0	0	0	0	0	0	0	0	0.000	0.000	0.000	0.000	0.000	0.000
23	6	3	SH2-B homolog	P000302	13010	27089	400	12336	12362	890	10538	10595	617	96	81	0	0	0	0	0	0	0	0	0	0	0	0	0	0	0	0	0	0	0	0	0	0	0	0	0	0	0	0	0.000	0.000	0.000	0.000	0.000	0.000
23	1	4	IMP (inosine monophosphate) dehydrogenase 1	P000393	10023	27843	400	12850	13018	1365	10538	10802	785	92	72	0	0	0	0	0	0	0	0	0	0	0	0	0	0	0	0	0	0	0	0	0	0	0	0	0	0	0	0	0.000	0.000	0.000	0.000	0.000	0.000
23	2	4	IMP (inosine monophosphate) dehydrogenase 1	P000393	10620	27843	400	11308	13242	4361	11052	11330	1324	34	24	0	0	0	0	0	0	0	0	0	0	0	0	0	0	0	0	0	0	0	0	0	0	0	0	0	0	0	0	0.000	0.000	0.000	0.000	0.000	0.000
23	3	4	IMP (inosine monophosphate) dehydrogenase 1	P000393	11218	27843	400	12336	12787	1950	10538	11399	2671	24	8	0	0	0	0	0	0	0	0	0	0	0	0	0	0	0	0	0	0	0	0	0	0	0	0	0	0	0	0	0.000	0.000	0.000	0.000	0.000	0.000
23	4	4	IMP (inosine monophosphate) dehydrogenase 1	P000393	11815	27843	400	12080	12032	839	11052	11562	2450	5	0	0	0	0	0	0	0	0	0	0	0	0	0	0	0	0	0	0	0	0	0	0	0	0	0	0	0	0	0	0.000	0.000	0.000	0.000	0.000	0.000
23	5	4	hexokinase 1; transcript variant 1	P000495	12413	27843	400	11308	12024	1818	11566	12063	1565	20	10	0	0	0	0	0	0	0	0	0	0	0	0	0	0	0	0	0	0	0	0	0	0	0	0	0	0	0	0	0.000	0.000	0.000	0.000	0.000	0.000
23	6	4	hexokinase 1; transcript variant 1	P000495	13010	27843	400	11822	13693	4205	10538	10632	760	73	49	0	0	0	0	0	0	0	0	0	0	0	0	0	0	0	0	0	0	0	0	0	0	0	0	0	0	0	0	0.000	0.000	0.000	0.000	0.000	0.000
23	1	5	hexokinase 1; transcript variant 1	P000495	10023	28596	400	11566	11811	834	11308	11324	963	26	5	0	0	0	0	0	0	0	0	0	0	0	0	0	0	0	0	0	0	0	0	0	0	0	0	0	0	0	0	0.000	0.000	0.000	0.000	0.000	0.000
23	2	5	hexokinase 1; transcript variant 1	P000495	10620	28596	400	11052	11552	1280	11308	11714	1047	25	9	0	0	0	0	0	0	0	0	0	0	0	0	0	0	0	0	0	0	0	0	0	0	0	0	0	0	0	0	0.000	0.000	0.000	0.000	0.000	0.000
23	3	5	vitamin D receptor interacting protein	P000834	11218	28596	400	13236	15078	5018	10794	10732	620	78	67	0	0	0	0	0	0	0	0	0	0	0	0	0	0	0	0	0	0	0	0	0	0	0	0	0	0	0	0	0.000	0.000	0.000	0.000	0.000	0.000
23	4	5	vitamin D receptor interacting protein	P000834	11815	28596	400	12080	13312	3508	10794	10829	859	57	44	0	0	0	0	0	0	0	0	0	0	0	0	0	0	0	0	0	0	0	0	0	0	0	0	0	0	0	0	0.000	0.000	0.000	0.000	0.000	0.000
23	5	5	vitamin D receptor interacting protein	P000834	12413	28596	400	11822	12253	1564	11052	11169	1145	43	20	0	0	0	0	0	0	0	0	0	0	0	0	0	0	0	0	0	0	0	0	0	0	0	0	0	0	0	0	0.000	0.000	0.000	0.000	0.000	0.000
23	6	5	vitamin D receptor interacting protein	P000834	13010	28596	400	12080	12228	1092	10794	10761	812	67	36	0	0	0	0	0	0	0	0	0	0	0	0	0	0	0	0	0	0	0	0	0	0	0	0	0	0	0	0	0.000	0.000	0.000	0.000	0.000	0.000
24	1	1	Cy5/Cy3 labeled biotin-BSA marker proteins	n/a	13607	25557	400	10794	10828	779	10794	11485	2499	0	0	0	0	0	0	0	0	0	0	0	0	0	0	0	0	0	0	0	0	0	0	0	0	0	0	0	0	0	0	0.000	0.000	0.000	0.000	0.000	0.000
24	2	1	Cy5/Cy3 labeled biotin-BSA marker proteins	n/a	14204	25557	400	11052	11135	690	10538	11028	1763	5	0	0	0	0	0	0	0	0	0	0	0	0	0	0	0	0	0	0	0	0	0	0	0	0	0	0	0	0	0	0.000	0.000	0.000	0.000	0.000	0.000
24	3	1	empty	empty	14802	25557	400	10794	11041	1036	10794	11185	1823	9	0	0	0	0	0	0	0	0	0	0	0	0	0	0	0	0	0	0	0	0	0	0	0	0	0	0	0	0	0	0.000	0.000	0.000	0.000	0.000	0.000
24	4	1	empty	empty	15399	25557	400	11052	11263	1364	11052	11340	1948	12	1	0	0	0	0	0	0	0	0	0	0	0	0	0	0	0	0	0	0	0	0	0	0	0	0	0	0	0	0	0.000	0.000	0.000	0.000	0.000	0.000
24	5	1	empty	empty	15997	25557	400	11308	11183	664	11052	11139	572	23	5	0	0	0	0	0	0	0	0	0	0	0	0	0	0	0	0	0	0	0	0	0	0	0	0	0	0	0	0	0.000	0.000	0.000	0.000	0.000	0.000
24	6	1	empty	empty	16594	25557	400	11822	12581	2212	11308	12289	3386	18	3	0	0	0	0	0	0	0	0	0	0	0	0	0	0	0	0	0	0	0	0	0	0	0	0	0	0	0	0	0.000	0.000	0.000	0.000	0.000	0.000
24	1	2	Buffer	n/a	13607	26311	400	10538	10577	1055	10538	10700	659	37	11	0	0	0	0	0	0	0	0	0	0	0	0	0	0	0	0	0	0	0	0	0	0	0	0	0	0	0	0	0.000	0.000	0.000	0.000	0.000	0.000
24	2	2	Buffer	n/a	14204	26311	400	10794	10832	660	10280	10496	790	32	0	0	0	0	0	0	0	0	0	0	0	0	0	0	0	0	0	0	0	0	0	0	0	0	0	0	0	0	0	0.000	0.000	0.000	0.000	0.000	0.000
24	3	2	Buffer	n/a	14802	26311	400	10538	10439	678	10538	10729	886	5	0	0	0	0	0	0	0	0	0	0	0	0	0	0	0	0	0	0	0	0	0	0	0	0	0	0	0	0	0	0.000	0.000	0.000	0.000	0.000	0.000
24	4	2	Buffer	n/a	15399	26311	400	10794	10778	832	10538	10639	658	21	10	0	0	0	0	0	0	0	0	0	0	0	0	0	0	0	0	0	0	0	0	0	0	0	0	0	0	0	0	0.000	0.000	0.000	0.000	0.000	0.000
24	5	2	p21(CDKN1A)-activated kinase 4	P000079	15997	26311	400	16192	17389	3418	11052	11152	718	98	97	0	0	0	0	0	0	0	0	0	0	0	0	0	0	0	0	0	0	0	0	0	0	0	0	0	0	0	0	0.000	0.000	0.000	0.000	0.000	0.000
24	6	2	p21(CDKN1A)-activated kinase 4	P000079	16594	26311	400	16192	16073	3268	11052	11252	1446	89	77	0	0	0	0	0	0	0	0	0	0	0	0	0	0	0	0	0	0	0	0	0	0	0	0	0	0	0	0	0.000	0.000	0.000	0.000	0.000	0.000
24	1	3	p21(CDKN1A)-activated kinase 4	P000079	13607	27064	400	19790	20427	4799	10538	10627	630	100	100	0	0	0	0	0	0	0	0	0	0	0	0	0	0	0	0	0	0	0	0	0	0	0	0	0	0	0	0	0.000	0.000	0.000	0.000	0.000	0.000
24	2	3	p21(CDKN1A)-activated kinase 4	P000079	14204	27064	400	15934	16055	2077	10280	10615	1021	100	95	0	0	0	0	0	0	0	0	0	0	0	0	0	0	0	0	0	0	0	0	0	0	0	0	0	0	0	0	0.000	0.000	0.000	0.000	0.000	0.000
24	3	3	cyclin D1 (PRAD1: parathyroid adenomatosis 1)	P000266	14802	27064	400	12594	13123	2224	11052	11107	1018	74	33	0	0	0	0	0	0	0	0	0	0	0	0	0	0	0	0	0	0	0	0	0	0	0	0	0	0	0	0	0.000	0.000	0.000	0.000	0.000	0.000
24	4	3	cyclin D1 (PRAD1: parathyroid adenomatosis 1)	P000266	15399	27064	400	10538	10581	631	10280	10606	1340	6	0	0	0	0	0	0	0	0	0	0	0	0	0	0	0	0	0	0	0	0	0	0	0	0	0	0	0	0	0	0.000	0.000	0.000	0.000	0.000	0.000
24	5	3	cyclin D1 (PRAD1: parathyroid adenomatosis 1)	P000266	15997	27064	400	11566	11687	763	10794	10892	944	49	9	0	0	0	0	0	0	0	0	0	0	0	0	0	0	0	0	0	0	0	0	0	0	0	0	0	0	0	0	0.000	0.000	0.000	0.000	0.000	0.000
24	6	3	cyclin D1 (PRAD1: parathyroid adenomatosis 1)	P000266	16594	27064	400	12336	12793	2067	10794	11072	1202	61	35	0	0	0	0	0	0	0	0	0	0	0	0	0	0	0	0	0	0	0	0	0	0	0	0	0	0	0	0	0.000	0.000	0.000	0.000	0.000	0.000
24	1	4	embryonal Fyn-associated substrate; transcript variant 2	P000361	13607	27818	400	11822	12167	1475	10024	10209	864	79	57	0	0	0	0	0	0	0	0	0	0	0	0	0	0	0	0	0	0	0	0	0	0	0	0	0	0	0	0	0.000	0.000	0.000	0.000	0.000	0.000
24	2	4	embryonal Fyn-associated substrate; transcript variant 2	P000361	14204	27818	400	11566	11561	998	10538	10930	1350	41	0	0	0	0	0	0	0	0	0	0	0	0	0	0	0	0	0	0	0	0	0	0	0	0	0	0	0	0	0	0.000	0.000	0.000	0.000	0.000	0.000
24	3	4	embryonal Fyn-associated substrate; transcript variant 2	P000361	14802	27818	400	11308	11628	1518	10280	10659	1117	40	20	0	0	0	0	0	0	0	0	0	0	0	0	0	0	0	0	0	0	0	0	0	0	0	0	0	0	0	0	0.000	0.000	0.000	0.000	0.000	0.000
24	4	4	embryonal Fyn-associated substrate; transcript variant 2	P000361	15399	27818	400	10280	10626	1094	10280	10331	915	27	11	0	0	0	0	0	0	0	0	0	0	0	0	0	0	0	0	0	0	0	0	0	0	0	0	0	0	0	0	0.000	0.000	0.000	0.000	0.000	0.000
24	5	4	arrestin; beta 1; transcript variant 1	P000472	15997	27818	400	10794	10715	673	10538	10584	941	12	3	0	0	0	0	0	0	0	0	0	0	0	0	0	0	0	0	0	0	0	0	0	0	0	0	0	0	0	0	0.000	0.000	0.000	0.000	0.000	0.000
24	6	4	arrestin; beta 1; transcript variant 1	P000472	16594	27818	400	10794	10827	591	11308	11393	1356	0	0	0	0	0	0	0	0	0	0	0	0	0	0	0	0	0	0	0	0	0	0	0	0	0	0	0	0	0	0	0.000	0.000	0.000	0.000	0.000	0.000
24	1	5	arrestin; beta 1; transcript variant 1	P000472	13607	28571	400	11822	17160	12345	10538	10872	889	60	36	0	0	0	0	0	0	0	0	0	0	0	0	0	0	0	0	0	0	0	0	0	0	0	0	0	0	0	0	0.000	0.000	0.000	0.000	0.000	0.000
24	2	5	arrestin; beta 1; transcript variant 1	P000472	14204	28571	400	10794	10886	590	10538	10556	628	31	10	0	0	0	0	0	0	0	0	0	0	0	0	0	0	0	0	0	0	0	0	0	0	0	0	0	0	0	0	0.000	0.000	0.000	0.000	0.000	0.000
24	3	5	phosphoinositide-3-kinase; regulatory subunit 1 (p85 alpha)	P000573	14802	28571	400	11308	11504	971	10024	10336	1028	65	36	0	0	0	0	0	0	0	0	0	0	0	0	0	0	0	0	0	0	0	0	0	0	0	0	0	0	0	0	0.000	0.000	0.000	0.000	0.000	0.000
24	4	5	phosphoinositide-3-kinase; regulatory subunit 1 (p85 alpha)	P000573	15399	28571	400	10280	10470	634	10280	10354	884	17	0	0	0	0	0	0	0	0	0	0	0	0	0	0	0	0	0	0	0	0	0	0	0	0	0	0	0	0	0	0.000	0.000	0.000	0.000	0.000	0.000
24	5	5	phosphoinositide-3-kinase; regulatory subunit 1 (p85 alpha)	P000573	15997	28571	400	11052	11254	1424	10794	10685	737	29	13	0	0	0	0	0	0	0	0	0	0	0	0	0	0	0	0	0	0	0	0	0	0	0	0	0	0	0	0	0.000	0.000	0.000	0.000	0.000	0.000
24	6	5	phosphoinositide-3-kinase; regulatory subunit 1 (p85 alpha)	P000573	16594	28571	400	10538	10715	770	10538	10534	679	30	6	0	0	0	0	0	0	0	0	0	0	0	0	0	0	0	0	0	0	0	0	0	0	0	0	0	0	0	0	0.000	0.000	0.000	0.000	0.000	0.000
25	1	1	Cy5/Cy3 labeled biotin-BSA marker proteins	n/a	2805	29265	400	13364	13820	2300	13108	13546	2291	15	7	0	0	0	0	0	0	0	0	0	0	0	0	0	0	0	0	0	0	0	0	0	0	0	0	0	0	0	0	0.000	0.000	0.000	0.000	0.000	0.000
25	2	1	Cy5/Cy3 labeled biotin-BSA marker proteins	n/a	3402	29265	400	13622	13946	1854	13108	13160	878	35	20	0	0	0	0	0	0	0	0	0	0	0	0	0	0	0	0	0	0	0	0	0	0	0	0	0	0	0	0	0.000	0.000	0.000	0.000	0.000	0.000
25	3	1	empty	empty	4000	29265	400	13108	13017	757	12594	12656	987	21	4	0	0	0	0	0	0	0	0	0	0	0	0	0	0	0	0	0	0	0	0	0	0	0	0	0	0	0	0	0.000	0.000	0.000	0.000	0.000	0.000
25	4	1	empty	empty	4597	29265	400	12850	12808	599	12594	13148	1778	0	0	0	0	0	0	0	0	0	0	0	0	0	0	0	0	0	0	0	0	0	0	0	0	0	0	0	0	0	0	0.000	0.000	0.000	0.000	0.000	0.000
25	5	1	empty	empty	5195	29265	400	12850	13326	1402	12336	12552	1270	32	15	0	0	0	0	0	0	0	0	0	0	0	0	0	0	0	0	0	0	0	0	0	0	0	0	0	0	0	0	0.000	0.000	0.000	0.000	0.000	0.000
25	6	1	empty	empty	5792	29265	400	12080	12233	514	12336	12703	1545	0	0	0	0	0	0	0	0	0	0	0	0	0	0	0	0	0	0	0	0	0	0	0	0	0	0	0	0	0	0	0.000	0.000	0.000	0.000	0.000	0.000
25	1	2	ribosomal protein S6 kinase; 90kDa; polypeptide 5; transcript variant 2	P000055	2805	30019	400	14650	14507	861	13108	13502	2436	7	0	0	0	0	0	0	0	0	0	0	0	0	0	0	0	0	0	0	0	0	0	0	0	0	0	0	0	0	0	0.000	0.000	0.000	0.000	0.000	0.000
25	2	2	ribosomal protein S6 kinase; 90kDa; polypeptide 5; transcript variant 2	P000055	3402	30019	400	14650	14349	1039	12594	12524	809	81	61	0	0	0	0	0	0	0	0	0	0	0	0	0	0	0	0	0	0	0	0	0	0	0	0	0	0	0	0	0.000	0.000	0.000	0.000	0.000	0.000
25	3	2	ribosomal protein S6 kinase; 90kDa; polypeptide 5; transcript variant 2	P000055	4000	30019	400	14650	14420	1201	13108	13231	924	65	25	0	0	0	0	0	0	0	0	0	0	0	0	0	0	0	0	0	0	0	0	0	0	0	0	0	0	0	0	0.000	0.000	0.000	0.000	0.000	0.000
25	4	2	ribosomal protein S6 kinase; 90kDa; polypeptide 5; transcript variant 2	P000055	4597	30019	400	14906	14761	838	12850	12834	968	87	52	0	0	0	0	0	0	0	0	0	0	0	0	0	0	0	0	0	0	0	0	0	0	0	0	0	0	0	0	0.000	0.000	0.000	0.000	0.000	0.000
25	5	2	MAD; mothers against decapentaplegic homolog 4 (Drosophila)	P000187	5195	30019	400	20304	19728	2960	12850	13287	1700	97	82	0	0	0	0	0	0	0	0	0	0	0	0	0	0	0	0	0	0	0	0	0	0	0	0	0	0	0	0	0.000	0.000	0.000	0.000	0.000	0.000
25	6	2	MAD; mothers against decapentaplegic homolog 4 (Drosophila)	P000187	5792	30019	400	17990	17669	1682	12336	12684	1534	100	89	0	0	0	0	0	0	0	0	0	0	0	0	0	0	0	0	0	0	0	0	0	0	0	0	0	0	0	0	0.000	0.000	0.000	0.000	0.000	0.000
25	1	3	MAD; mothers against decapentaplegic homolog 4 (Drosophila)	P000187	2805	30772	400	18248	17600	1590	12336	12490	588	99	97	0	0	0	0	0	0	0	0	0	0	0	0	0	0	0	0	0	0	0	0	0	0	0	0	0	0	0	0	0.000	0.000	0.000	0.000	0.000	0.000
25	2	3	MAD; mothers against decapentaplegic homolog 4 (Drosophila)	P000187	3402	30772	400	17220	17038	1701	12850	12802	891	97	93	0	0	0	0	0	0	0	0	0	0	0	0	0	0	0	0	0	0	0	0	0	0	0	0	0	0	0	0	0.000	0.000	0.000	0.000	0.000	0.000
25	3	3	TANK-binding kinase 1	P000341	4000	30772	400	14650	14736	1981	13108	13476	1506	50	10	0	0	0	0	0	0	0	0	0	0	0	0	0	0	0	0	0	0	0	0	0	0	0	0	0	0	0	0	0.000	0.000	0.000	0.000	0.000	0.000
25	4	3	TANK-binding kinase 1	P000341	4597	30772	400	15164	15394	1947	12594	12445	786	84	67	0	0	0	0	0	0	0	0	0	0	0	0	0	0	0	0	0	0	0	0	0	0	0	0	0	0	0	0	0.000	0.000	0.000	0.000	0.000	0.000
25	5	3	TANK-binding kinase 1	P000341	5195	30772	400	16192	16495	2056	13108	13140	738	93	82	0	0	0	0	0	0	0	0	0	0	0	0	0	0	0	0	0	0	0	0	0	0	0	0	0	0	0	0	0.000	0.000	0.000	0.000	0.000	0.000
25	6	3	TANK-binding kinase 1	P000341	5792	30772	400	15934	15735	1267	12850	12935	946	92	76	0	0	0	0	0	0	0	0	0	0	0	0	0	0	0	0	0	0	0	0	0	0	0	0	0	0	0	0	0.000	0.000	0.000	0.000	0.000	0.000
25	1	4	CDC20 cell division cycle 20 homolog (S. cerevisiae)	P000442	2805	31526	400	15934	16189	2510	12080	12011	659	96	81	0	0	0	0	0	0	0	0	0	0	0	0	0	0	0	0	0	0	0	0	0	0	0	0	0	0	0	0	0.000	0.000	0.000	0.000	0.000	0.000
25	2	4	CDC20 cell division cycle 20 homolog (S. cerevisiae)	P000442	3402	31526	400	15164	15471	1665	12336	12412	814	95	85	0	0	0	0	0	0	0	0	0	0	0	0	0	0	0	0	0	0	0	0	0	0	0	0	0	0	0	0	0.000	0.000	0.000	0.000	0.000	0.000
25	3	4	CDC20 cell division cycle 20 homolog (S. cerevisiae)	P000442	4000	31526	400	14136	14384	1589	12594	12604	1052	60	32	0	0	0	0	0	0	0	0	0	0	0	0	0	0	0	0	0	0	0	0	0	0	0	0	0	0	0	0	0.000	0.000	0.000	0.000	0.000	0.000
25	4	4	CDC20 cell division cycle 20 homolog (S. cerevisiae)	P000442	4597	31526	400	15164	14921	1328	12336	12445	1141	83	63	0	0	0	0	0	0	0	0	0	0	0	0	0	0	0	0	0	0	0	0	0	0	0	0	0	0	0	0	0.000	0.000	0.000	0.000	0.000	0.000
25	5	4	mitogen-activated protein kinase kinase kinase 6	P000552	5195	31526	400	14650	14433	985	12336	12690	1254	81	41	0	0	0	0	0	0	0	0	0	0	0	0	0	0	0	0	0	0	0	0	0	0	0	0	0	0	0	0	0.000	0.000	0.000	0.000	0.000	0.000
25	6	4	mitogen-activated protein kinase kinase kinase 6	P000552	5792	31526	400	14906	14916	1203	12850	12902	1209	76	39	0	0	0	0	0	0	0	0	0	0	0	0	0	0	0	0	0	0	0	0	0	0	0	0	0	0	0	0	0.000	0.000	0.000	0.000	0.000	0.000
25	1	5	mitogen-activated protein kinase kinase kinase 6	P000552	2805	32279	400	15164	15928	3514	12594	12720	998	78	61	0	0	0	0	0	0	0	0	0	0	0	0	0	0	0	0	0	0	0	0	0	0	0	0	0	0	0	0	0.000	0.000	0.000	0.000	0.000	0.000
25	2	5	mitogen-activated protein kinase kinase kinase 6	P000552	3402	32279	400	13878	14155	1821	12850	13521	3061	19	0	0	0	0	0	0	0	0	0	0	0	0	0	0	0	0	0	0	0	0	0	0	0	0	0	0	0	0	0	0.000	0.000	0.000	0.000	0.000	0.000
25	3	5	Buffer	n/a	4000	32279	400	12080	12121	786	12080	12130	852	16	3	0	0	0	0	0	0	0	0	0	0	0	0	0	0	0	0	0	0	0	0	0	0	0	0	0	0	0	0	0.000	0.000	0.000	0.000	0.000	0.000
25	4	5	Buffer	n/a	4597	32279	400	12594	13176	1819	12336	12271	985	30	19	0	0	0	0	0	0	0	0	0	0	0	0	0	0	0	0	0	0	0	0	0	0	0	0	0	0	0	0	0.000	0.000	0.000	0.000	0.000	0.000
25	5	5	Buffer	n/a	5195	32279	400	12080	11725	1027	12080	12081	809	7	0	0	0	0	0	0	0	0	0	0	0	0	0	0	0	0	0	0	0	0	0	0	0	0	0	0	0	0	0	0.000	0.000	0.000	0.000	0.000	0.000
25	6	5	Buffer	n/a	5792	32279	400	12336	12312	886	12080	12198	470	36	18	0	0	0	0	0	0	0	0	0	0	0	0	0	0	0	0	0	0	0	0	0	0	0	0	0	0	0	0	0.000	0.000	0.000	0.000	0.000	0.000
26	1	1	BSA1	n/a	6414	29190	400	12594	12454	797	12594	13636	4735	0	0	0	0	0	0	0	0	0	0	0	0	0	0	0	0	0	0	0	0	0	0	0	0	0	0	0	0	0	0	0.000	0.000	0.000	0.000	0.000	0.000
26	2	1	BSA1	n/a	7011	29190	400	11822	11841	726	11566	11834	779	15	5	0	0	0	0	0	0	0	0	0	0	0	0	0	0	0	0	0	0	0	0	0	0	0	0	0	0	0	0	0.000	0.000	0.000	0.000	0.000	0.000
26	3	1	empty	empty	7609	29190	400	12594	12859	1191	11308	11303	856	64	39	0	0	0	0	0	0	0	0	0	0	0	0	0	0	0	0	0	0	0	0	0	0	0	0	0	0	0	0	0.000	0.000	0.000	0.000	0.000	0.000
26	4	1	empty	empty	8206	29190	400	11822	12138	1589	11308	11235	702	40	23	0	0	0	0	0	0	0	0	0	0	0	0	0	0	0	0	0	0	0	0	0	0	0	0	0	0	0	0	0.000	0.000	0.000	0.000	0.000	0.000
26	5	1	empty	empty	8804	29190	400	11566	11469	706	11566	11519	765	15	0	0	0	0	0	0	0	0	0	0	0	0	0	0	0	0	0	0	0	0	0	0	0	0	0	0	0	0	0	0.000	0.000	0.000	0.000	0.000	0.000
26	6	1	empty	empty	9401	29190	400	11308	11166	585	11566	11503	750	1	0	0	0	0	0	0	0	0	0	0	0	0	0	0	0	0	0	0	0	0	0	0	0	0	0	0	0	0	0	0.000	0.000	0.000	0.000	0.000	0.000
26	1	2	protein kinase C; beta 1	P000033	6414	29944	400	15678	15341	1512	12080	12073	657	94	88	0	0	0	0	0	0	0	0	0	0	0	0	0	0	0	0	0	0	0	0	0	0	0	0	0	0	0	0	0.000	0.000	0.000	0.000	0.000	0.000
26	2	2	protein kinase C; beta 1	P000033	7011	29944	400	15420	15423	1507	11822	12011	671	100	96	0	0	0	0	0	0	0	0	0	0	0	0	0	0	0	0	0	0	0	0	0	0	0	0	0	0	0	0	0.000	0.000	0.000	0.000	0.000	0.000
26	3	2	protein kinase C; beta 1	P000033	7609	29944	400	15678	15650	1614	12850	12743	752	91	75	0	0	0	0	0	0	0	0	0	0	0	0	0	0	0	0	0	0	0	0	0	0	0	0	0	0	0	0	0.000	0.000	0.000	0.000	0.000	0.000
26	4	2	protein kinase C; beta 1	P000033	8206	29944	400	15678	19564	8164	11822	11781	1273	97	84	0	0	0	0	0	0	0	0	0	0	0	0	0	0	0	0	0	0	0	0	0	0	0	0	0	0	0	0	0.000	0.000	0.000	0.000	0.000	0.000
26	5	2	TNF receptor-associated factor 2; transcript variant 1	P000139	8804	29944	400	17476	17280	1994	11052	10972	597	100	100	0	0	0	0	0	0	0	0	0	0	0	0	0	0	0	0	0	0	0	0	0	0	0	0	0	0	0	0	0.000	0.000	0.000	0.000	0.000	0.000
26	6	2	TNF receptor-associated factor 2; transcript variant 1	P000139	9401	29944	400	15420	15194	1390	11566	11540	832	96	89	0	0	0	0	0	0	0	0	0	0	0	0	0	0	0	0	0	0	0	0	0	0	0	0	0	0	0	0	0.000	0.000	0.000	0.000	0.000	0.000
26	1	3	TNF receptor-associated factor 2; transcript variant 1	P000139	6414	30697	400	21588	23168	5577	12594	12643	922	99	97	0	0	0	0	0	0	0	0	0	0	0	0	0	0	0	0	0	0	0	0	0	0	0	0	0	0	0	0	0.000	0.000	0.000	0.000	0.000	0.000
26	2	3	TNF receptor-associated factor 2; transcript variant 1	P000139	7011	30697	400	19276	19326	2346	12594	12472	713	100	100	0	0	0	0	0	0	0	0	0	0	0	0	0	0	0	0	0	0	0	0	0	0	0	0	0	0	0	0	0.000	0.000	0.000	0.000	0.000	0.000
26	3	3	mitogen-activated protein kinase kinase kinase 7; transcript variant A	P000322	7609	30697	400	13622	13306	836	12594	12612	1428	16	0	0	0	0	0	0	0	0	0	0	0	0	0	0	0	0	0	0	0	0	0	0	0	0	0	0	0	0	0	0.000	0.000	0.000	0.000	0.000	0.000
26	4	3	mitogen-activated protein kinase kinase kinase 7; transcript variant A	P000322	8206	30697	400	13878	13752	968	12080	14354	5351	0	0	0	0	0	0	0	0	0	0	0	0	0	0	0	0	0	0	0	0	0	0	0	0	0	0	0	0	0	0	0.000	0.000	0.000	0.000	0.000	0.000
26	5	3	mitogen-activated protein kinase kinase kinase 7; transcript variant A	P000322	8804	30697	400	12850	12813	1012	11308	11531	668	75	56	0	0	0	0	0	0	0	0	0	0	0	0	0	0	0	0	0	0	0	0	0	0	0	0	0	0	0	0	0.000	0.000	0.000	0.000	0.000	0.000
26	6	3	mitogen-activated protein kinase kinase kinase 7; transcript variant A	P000322	9401	30697	400	12850	13362	1974	11566	13436	4584	13	0	0	0	0	0	0	0	0	0	0	0	0	0	0	0	0	0	0	0	0	0	0	0	0	0	0	0	0	0	0.000	0.000	0.000	0.000	0.000	0.000
26	1	4	interferon regulatory factor 5; transcript variant 2	P000423	6414	31451	400	14906	14882	883	13364	13519	1182	70	15	0	0	0	0	0	0	0	0	0	0	0	0	0	0	0	0	0	0	0	0	0	0	0	0	0	0	0	0	0.000	0.000	0.000	0.000	0.000	0.000
26	2	4	interferon regulatory factor 5; transcript variant 2	P000423	7011	31451	400	13878	14249	1371	12850	12794	619	59	47	0	0	0	0	0	0	0	0	0	0	0	0	0	0	0	0	0	0	0	0	0	0	0	0	0	0	0	0	0.000	0.000	0.000	0.000	0.000	0.000
26	3	4	interferon regulatory factor 5; transcript variant 2	P000423	7609	31451	400	13364	13492	909	12336	12321	716	71	39	0	0	0	0	0	0	0	0	0	0	0	0	0	0	0	0	0	0	0	0	0	0	0	0	0	0	0	0	0.000	0.000	0.000	0.000	0.000	0.000
26	4	4	interferon regulatory factor 5; transcript variant 2	P000423	8206	31451	400	13878	13828	1278	12080	12470	1661	57	10	0	0	0	0	0	0	0	0	0	0	0	0	0	0	0	0	0	0	0	0	0	0	0	0	0	0	0	0	0.000	0.000	0.000	0.000	0.000	0.000
26	5	4	adducin 1 (alpha)	P000525	8804	31451	400	12850	13132	1183	12080	12602	2149	18	1	0	0	0	0	0	0	0	0	0	0	0	0	0	0	0	0	0	0	0	0	0	0	0	0	0	0	0	0	0.000	0.000	0.000	0.000	0.000	0.000
26	6	4	adducin 1 (alpha)	P000525	9401	31451	400	12336	12098	773	11566	12556	2982	0	0	0	0	0	0	0	0	0	0	0	0	0	0	0	0	0	0	0	0	0	0	0	0	0	0	0	0	0	0	0.000	0.000	0.000	0.000	0.000	0.000
26	1	5	adducin 1 (alpha)	P000525	6414	32204	400	14136	14046	1585	12336	12742	1523	59	16	0	0	0	0	0	0	0	0	0	0	0	0	0	0	0	0	0	0	0	0	0	0	0	0	0	0	0	0	0.000	0.000	0.000	0.000	0.000	0.000
26	2	5	adducin 1 (alpha)	P000525	7011	32204	400	15420	16622	3533	12336	12270	755	100	90	0	0	0	0	0	0	0	0	0	0	0	0	0	0	0	0	0	0	0	0	0	0	0	0	0	0	0	0	0.000	0.000	0.000	0.000	0.000	0.000
26	3	5	hematopoietic cell-specific Lyn substrate 1	P000845	7609	32204	400	21332	23435	7908	12080	12348	1487	100	98	0	0	0	0	0	0	0	0	0	0	0	0	0	0	0	0	0	0	0	0	0	0	0	0	0	0	0	0	0.000	0.000	0.000	0.000	0.000	0.000
26	4	5	hematopoietic cell-specific Lyn substrate 1	P000845	8206	32204	400	18504	18211	2080	12080	12077	1388	96	93	0	0	0	0	0	0	0	0	0	0	0	0	0	0	0	0	0	0	0	0	0	0	0	0	0	0	0	0	0.000	0.000	0.000	0.000	0.000	0.000
26	5	5	hematopoietic cell-specific Lyn substrate 1	P000845	8804	32204	400	22360	25952	9542	11308	11395	1279	100	99	0	0	0	0	0	0	0	0	0	0	0	0	0	0	0	0	0	0	0	0	0	0	0	0	0	0	0	0	0.000	0.000	0.000	0.000	0.000	0.000
26	6	5	hematopoietic cell-specific Lyn substrate 1	P000845	9401	32204	400	22102	25939	11167	11308	11592	1673	100	98	1	0	0	0	0	0	0	0	0	0	0	0	0	0	0	0	0	0	0	0	0	0	0	0	0	0	0	0	0.000	0.000	0.000	0.000	0.000	0.000
27	1	1	Nonphosphopeptide1	empty	10047	29165	400	12336	12228	1070	11308	11266	882	52	33	0	0	0	0	0	0	0	0	0	0	0	0	0	0	0	0	0	0	0	0	0	0	0	0	0	0	0	0	0.000	0.000	0.000	0.000	0.000	0.000
27	2	1	Nonphosphopeptide1	empty	10644	29165	400	11308	11443	966	11052	11119	686	34	16	0	0	0	0	0	0	0	0	0	0	0	0	0	0	0	0	0	0	0	0	0	0	0	0	0	0	0	0	0.000	0.000	0.000	0.000	0.000	0.000
27	3	1	empty	empty	11242	29165	400	10794	10802	850	10538	10590	874	18	4	0	0	0	0	0	0	0	0	0	0	0	0	0	0	0	0	0	0	0	0	0	0	0	0	0	0	0	0	0.000	0.000	0.000	0.000	0.000	0.000
27	4	1	empty	empty	11839	29165	400	11308	11990	2562	10538	10797	873	45	30	0	0	0	0	0	0	0	0	0	0	0	0	0	0	0	0	0	0	0	0	0	0	0	0	0	0	0	0	0.000	0.000	0.000	0.000	0.000	0.000
27	5	1	empty	empty	12437	29165	400	10794	11079	1446	10794	10911	841	29	17	0	0	0	0	0	0	0	0	0	0	0	0	0	0	0	0	0	0	0	0	0	0	0	0	0	0	0	0	0.000	0.000	0.000	0.000	0.000	0.000
27	6	1	empty	empty	13034	29165	400	10538	10375	800	11052	11085	862	1	0	0	0	0	0	0	0	0	0	0	0	0	0	0	0	0	0	0	0	0	0	0	0	0	0	0	0	0	0	0.000	0.000	0.000	0.000	0.000	0.000
27	1	2	serum/glucocorticoid regulated kinase-like; transcript variant 1	P000016	10047	29919	400	12850	13630	2857	10794	10791	578	72	64	0	0	0	0	0	0	0	0	0	0	0	0	0	0	0	0	0	0	0	0	0	0	0	0	0	0	0	0	0.000	0.000	0.000	0.000	0.000	0.000
27	2	2	serum/glucocorticoid regulated kinase-like; transcript variant 1	P000016	10644	29919	400	12208	13869	3642	10794	11021	1009	64	44	0	0	0	0	0	0	0	0	0	0	0	0	0	0	0	0	0	0	0	0	0	0	0	0	0	0	0	0	0.000	0.000	0.000	0.000	0.000	0.000
27	3	2	serum/glucocorticoid regulated kinase-like; transcript variant 1	P000016	11242	29919	400	11822	12163	2082	10794	11548	2593	13	6	0	0	0	0	0	0	0	0	0	0	0	0	0	0	0	0	0	0	0	0	0	0	0	0	0	0	0	0	0.000	0.000	0.000	0.000	0.000	0.000
27	4	2	serum/glucocorticoid regulated kinase-like; transcript variant 1	P000016	11839	29919	400	12080	12033	1015	11052	11183	1370	38	0	0	0	0	0	0	0	0	0	0	0	0	0	0	0	0	0	0	0	0	0	0	0	0	0	0	0	0	0	0.000	0.000	0.000	0.000	0.000	0.000
27	5	2	LIM domain kinase 2	P000099	12437	29919	400	13108	14310	3504	11308	11218	695	75	59	0	0	0	0	0	0	0	0	0	0	0	0	0	0	0	0	0	0	0	0	0	0	0	0	0	0	0	0	0.000	0.000	0.000	0.000	0.000	0.000
27	6	2	LIM domain kinase 2	P000099	13034	29919	400	13364	16462	7368	11052	12617	4025	38	25	0	0	0	0	0	0	0	0	0	0	0	0	0	0	0	0	0	0	0	0	0	0	0	0	0	0	0	0	0.000	0.000	0.000	0.000	0.000	0.000
27	1	3	LIM domain kinase 2	P000099	10047	30672	400	11822	12894	2384	10794	11164	1167	49	30	0	0	0	0	0	0	0	0	0	0	0	0	0	0	0	0	0	0	0	0	0	0	0	0	0	0	0	0	0.000	0.000	0.000	0.000	0.000	0.000
27	2	3	LIM domain kinase 2	P000099	10644	30672	400	11308	11483	834	10280	10493	902	65	20	0	0	0	0	0	0	0	0	0	0	0	0	0	0	0	0	0	0	0	0	0	0	0	0	0	0	0	0	0.000	0.000	0.000	0.000	0.000	0.000
27	3	3	guanine nucleotide binding protein (G protein); alpha 15 (Gq class)	P000304	11242	30672	400	12336	12049	814	10538	10597	642	81	69	0	0	0	0	0	0	0	0	0	0	0	0	0	0	0	0	0	0	0	0	0	0	0	0	0	0	0	0	0.000	0.000	0.000	0.000	0.000	0.000
27	4	3	guanine nucleotide binding protein (G protein); alpha 15 (Gq class)	P000304	11839	30672	400	12594	13565	2347	11052	12193	4356	23	1	0	0	0	0	0	0	0	0	0	0	0	0	0	0	0	0	0	0	0	0	0	0	0	0	0	0	0	0	0.000	0.000	0.000	0.000	0.000	0.000
27	5	3	guanine nucleotide binding protein (G protein); alpha 15 (Gq class)	P000304	12437	30672	400	12594	13406	2084	11052	11504	2121	36	16	0	0	0	0	0	0	0	0	0	0	0	0	0	0	0	0	0	0	0	0	0	0	0	0	0	0	0	0	0.000	0.000	0.000	0.000	0.000	0.000
27	6	3	guanine nucleotide binding protein (G protein); alpha 15 (Gq class)	P000304	13034	30672	400	10794	10839	543	10794	10937	498	28	9	0	0	0	0	0	0	0	0	0	0	0	0	0	0	0	0	0	0	0	0	0	0	0	0	0	0	0	0	0.000	0.000	0.000	0.000	0.000	0.000
27	1	4	early growth response 2 (Krox-20 homolog; Drosophila)	P000396	10047	31426	400	13108	13830	2488	11052	11028	1022	77	53	0	0	0	0	0	0	0	0	0	0	0	0	0	0	0	0	0	0	0	0	0	0	0	0	0	0	0	0	0.000	0.000	0.000	0.000	0.000	0.000
27	2	4	early growth response 2 (Krox-20 homolog; Drosophila)	P000396	10644	31426	400	11566	11650	805	10794	11737	3328	1	0	0	0	0	0	0	0	0	0	0	0	0	0	0	0	0	0	0	0	0	0	0	0	0	0	0	0	0	0	0.000	0.000	0.000	0.000	0.000	0.000
27	3	4	early growth response 2 (Krox-20 homolog; Drosophila)	P000396	11242	31426	400	11822	12058	1483	11308	11344	1231	26	13	0	0	0	0	0	0	0	0	0	0	0	0	0	0	0	0	0	0	0	0	0	0	0	0	0	0	0	0	0.000	0.000	0.000	0.000	0.000	0.000
27	4	4	early growth response 2 (Krox-20 homolog; Drosophila)	P000396	11839	31426	400	11566	12155	1976	11052	12049	4007	8	3	0	0	0	0	0	0	0	0	0	0	0	0	0	0	0	0	0	0	0	0	0	0	0	0	0	0	0	0	0.000	0.000	0.000	0.000	0.000	0.000
27	5	4	calmodulin 3 (phosphorylase kinase; delta)	P000496	12437	31426	400	11308	11295	807	10538	10705	1123	28	6	0	0	0	0	0	0	0	0	0	0	0	0	0	0	0	0	0	0	0	0	0	0	0	0	0	0	0	0	0.000	0.000	0.000	0.000	0.000	0.000
27	6	4	calmodulin 3 (phosphorylase kinase; delta)	P000496	13034	31426	400	11822	11902	864	10794	10956	895	55	27	0	0	0	0	0	0	0	0	0	0	0	0	0	0	0	0	0	0	0	0	0	0	0	0	0	0	0	0	0.000	0.000	0.000	0.000	0.000	0.000
27	1	5	calmodulin 3 (phosphorylase kinase; delta)	P000496	10047	32179	400	12336	12388	538	11566	11763	1702	7	0	0	0	0	0	0	0	0	0	0	0	0	0	0	0	0	0	0	0	0	0	0	0	0	0	0	0	0	0	0.000	0.000	0.000	0.000	0.000	0.000
27	2	5	calmodulin 3 (phosphorylase kinase; delta)	P000496	10644	32179	400	11822	12168	1663	10538	10663	1089	51	32	0	0	0	0	0	0	0	0	0	0	0	0	0	0	0	0	0	0	0	0	0	0	0	0	0	0	0	0	0.000	0.000	0.000	0.000	0.000	0.000
27	3	5	calcium/calmodulin-dependent protein kinase kinase 2; beta	P001116	11242	32179	400	17734	21579	9775	12336	13275	3843	64	38	0	0	0	0	0	0	0	0	0	0	0	0	0	0	0	0	0	0	0	0	0	0	0	0	0	0	0	0	0.000	0.000	0.000	0.000	0.000	0.000
27	4	5	calcium/calmodulin-dependent protein kinase kinase 2; beta	P001116	11839	32179	400	17220	18315	4643	11052	11554	1873	95	77	0	0	0	0	0	0	0	0	0	0	0	0	0	0	0	0	0	0	0	0	0	0	0	0	0	0	0	0	0.000	0.000	0.000	0.000	0.000	0.000
27	5	5	calcium/calmodulin-dependent protein kinase kinase 2; beta	P001116	12437	32179	400	18248	19108	3308	11052	11045	1161	100	100	0	0	0	0	0	0	0	0	0	0	0	0	0	0	0	0	0	0	0	0	0	0	0	0	0	0	0	0	0.000	0.000	0.000	0.000	0.000	0.000
27	6	5	calcium/calmodulin-dependent protein kinase kinase 2; beta	P001116	13034	32179	400	17476	17667	2194	10794	10761	643	100	99	0	0	0	0	0	0	0	0	0	0	0	0	0	0	0	0	0	0	0	0	0	0	0	0	0	0	0	0	0.000	0.000	0.000	0.000	0.000	0.000
28	1	1	Cy5/Cy3 labeled biotin-BSA marker proteins	n/a	13607	29215	400	10280	10513	654	10794	10936	905	6	0	0	0	0	0	0	0	0	0	0	0	0	0	0	0	0	0	0	0	0	0	0	0	0	0	0	0	0	0	0.000	0.000	0.000	0.000	0.000	0.000
28	2	1	Cy5/Cy3 labeled biotin-BSA marker proteins	n/a	14204	29215	400	10794	11015	953	11052	10995	772	17	7	0	0	0	0	0	0	0	0	0	0	0	0	0	0	0	0	0	0	0	0	0	0	0	0	0	0	0	0	0.000	0.000	0.000	0.000	0.000	0.000
28	3	1	empty	empty	14802	29215	400	10538	11597	4056	10280	10247	1056	26	12	0	0	0	0	0	0	0	0	0	0	0	0	0	0	0	0	0	0	0	0	0	0	0	0	0	0	0	0	0.000	0.000	0.000	0.000	0.000	0.000
28	4	1	empty	empty	15399	29215	400	10280	10313	691	10280	10213	740	22	1	0	0	0	0	0	0	0	0	0	0	0	0	0	0	0	0	0	0	0	0	0	0	0	0	0	0	0	0	0.000	0.000	0.000	0.000	0.000	0.000
28	5	1	empty	empty	15997	29215	400	9766	9699	689	10538	10420	806	1	0	0	0	0	0	0	0	0	0	0	0	0	0	0	0	0	0	0	0	0	0	0	0	0	0	0	0	0	0	0.000	0.000	0.000	0.000	0.000	0.000
28	6	1	empty	empty	16594	29215	400	10280	10272	713	10538	10446	714	11	0	0	0	0	0	0	0	0	0	0	0	0	0	0	0	0	0	0	0	0	0	0	0	0	0	0	0	0	0	0.000	0.000	0.000	0.000	0.000	0.000
28	1	2	Buffer	n/a	13607	29969	400	10538	10550	898	11308	11681	1858	0	0	0	0	0	0	0	0	0	0	0	0	0	0	0	0	0	0	0	0	0	0	0	0	0	0	0	0	0	0	0.000	0.000	0.000	0.000	0.000	0.000
28	2	2	Buffer	n/a	14204	29969	400	10794	10878	709	10538	10754	885	26	1	0	0	0	0	0	0	0	0	0	0	0	0	0	0	0	0	0	0	0	0	0	0	0	0	0	0	0	0	0.000	0.000	0.000	0.000	0.000	0.000
28	3	2	Buffer	n/a	14802	29969	400	10280	10496	1013	10538	10462	930	11	5	0	0	0	0	0	0	0	0	0	0	0	0	0	0	0	0	0	0	0	0	0	0	0	0	0	0	0	0	0.000	0.000	0.000	0.000	0.000	0.000
28	4	2	Buffer	n/a	15399	29969	400	10538	11022	1562	10794	10535	730	25	14	0	0	0	0	0	0	0	0	0	0	0	0	0	0	0	0	0	0	0	0	0	0	0	0	0	0	0	0	0.000	0.000	0.000	0.000	0.000	0.000
28	5	2	receptor-interacting serine-threonine kinase 2	P000080	15997	29969	400	11308	11242	1162	10024	9946	785	61	33	0	0	0	0	0	0	0	0	0	0	0	0	0	0	0	0	0	0	0	0	0	0	0	0	0	0	0	0	0.000	0.000	0.000	0.000	0.000	0.000
28	6	2	receptor-interacting serine-threonine kinase 2	P000080	16594	29969	400	11822	11781	878	10280	10358	727	80	57	0	0	0	0	0	0	0	0	0	0	0	0	0	0	0	0	0	0	0	0	0	0	0	0	0	0	0	0	0.000	0.000	0.000	0.000	0.000	0.000
28	1	3	receptor-interacting serine-threonine kinase 2	P000080	13607	30722	400	12594	12641	1144	10794	10776	895	83	57	0	0	0	0	0	0	0	0	0	0	0	0	0	0	0	0	0	0	0	0	0	0	0	0	0	0	0	0	0.000	0.000	0.000	0.000	0.000	0.000
28	2	3	receptor-interacting serine-threonine kinase 2	P000080	14204	30722	400	12594	13054	1871	10794	10944	922	78	47	0	0	0	0	0	0	0	0	0	0	0	0	0	0	0	0	0	0	0	0	0	0	0	0	0	0	0	0	0.000	0.000	0.000	0.000	0.000	0.000
28	3	3	epidermal growth factor receptor pathway substrate 15	P000275	14802	30722	400	12850	12637	1026	10409	10641	961	86	69	0	0	0	0	0	0	0	0	0	0	0	0	0	0	0	0	0	0	0	0	0	0	0	0	0	0	0	0	0.000	0.000	0.000	0.000	0.000	0.000
28	4	3	epidermal growth factor receptor pathway substrate 15	P000275	15399	30722	400	11308	11277	834	10538	10662	667	54	17	0	0	0	0	0	0	0	0	0	0	0	0	0	0	0	0	0	0	0	0	0	0	0	0	0	0	0	0	0.000	0.000	0.000	0.000	0.000	0.000
28	5	3	epidermal growth factor receptor pathway substrate 15	P000275	15997	30722	400	11052	11032	516	10280	10409	708	64	6	0	0	0	0	0	0	0	0	0	0	0	0	0	0	0	0	0	0	0	0	0	0	0	0	0	0	0	0	0.000	0.000	0.000	0.000	0.000	0.000
28	6	3	epidermal growth factor receptor pathway substrate 15	P000275	16594	30722	400	12080	11804	1091	9766	10064	819	82	68	0	0	0	0	0	0	0	0	0	0	0	0	0	0	0	0	0	0	0	0	0	0	0	0	0	0	0	0	0.000	0.000	0.000	0.000	0.000	0.000
28	1	4	cyclin-dependent kinase inhibitor 2C (p18; inhibits CDK4)	P000362	13607	31476	400	11822	11838	831	10794	10950	1239	46	4	0	0	0	0	0	0	0	0	0	0	0	0	0	0	0	0	0	0	0	0	0	0	0	0	0	0	0	0	0.000	0.000	0.000	0.000	0.000	0.000
28	2	4	cyclin-dependent kinase inhibitor 2C (p18; inhibits CDK4)	P000362	14204	31476	400	11308	11356	683	10794	11289	1473	9	1	0	0	0	0	0	0	0	0	0	0	0	0	0	0	0	0	0	0	0	0	0	0	0	0	0	0	0	0	0.000	0.000	0.000	0.000	0.000	0.000
28	3	4	cyclin-dependent kinase inhibitor 2C (p18; inhibits CDK4)	P000362	14802	31476	400	11052	11084	834	10794	10872	1323	8	0	0	0	0	0	0	0	0	0	0	0	0	0	0	0	0	0	0	0	0	0	0	0	0	0	0	0	0	0	0.000	0.000	0.000	0.000	0.000	0.000
28	4	4	cyclin-dependent kinase inhibitor 2C (p18; inhibits CDK4)	P000362	15399	31476	400	10538	10418	837	10538	10267	754	21	3	0	0	0	0	0	0	0	0	0	0	0	0	0	0	0	0	0	0	0	0	0	0	0	0	0	0	0	0	0.000	0.000	0.000	0.000	0.000	0.000
28	5	4	cell division cycle 42 (GTP binding protein; 25kDa); transcript variant 1	P000473	15997	31476	400	11052	11341	1354	9766	9951	664	70	46	0	0	0	0	0	0	0	0	0	0	0	0	0	0	0	0	0	0	0	0	0	0	0	0	0	0	0	0	0.000	0.000	0.000	0.000	0.000	0.000
28	6	4	cell division cycle 42 (GTP binding protein; 25kDa); transcript variant 1	P000473	16594	31476	400	10538	10537	885	10024	10055	672	46	19	0	0	0	0	0	0	0	0	0	0	0	0	0	0	0	0	0	0	0	0	0	0	0	0	0	0	0	0	0.000	0.000	0.000	0.000	0.000	0.000
28	1	5	cell division cycle 42 (GTP binding protein; 25kDa); transcript variant 1	P000473	13607	32229	400	12850	13848	3641	10538	10578	554	81	70	0	0	0	0	0	0	0	0	0	0	0	0	0	0	0	0	0	0	0	0	0	0	0	0	0	0	0	0	0.000	0.000	0.000	0.000	0.000	0.000
28	2	5	cell division cycle 42 (GTP binding protein; 25kDa); transcript variant 1	P000473	14204	32229	400	12080	12311	1284	10794	10886	499	78	60	0	0	0	0	0	0	0	0	0	0	0	0	0	0	0	0	0	0	0	0	0	0	0	0	0	0	0	0	0.000	0.000	0.000	0.000	0.000	0.000
28	3	5	guanine nucleotide binding protein (G protein); gamma transducing activity polypeptide 1	P000576	14802	32229	400	12594	12410	764	11052	10852	612	81	60	0	0	0	0	0	0	0	0	0	0	0	0	0	0	0	0	0	0	0	0	0	0	0	0	0	0	0	0	0.000	0.000	0.000	0.000	0.000	0.000
28	4	5	guanine nucleotide binding protein (G protein); gamma transducing activity polypeptide 1	P000576	15399	32229	400	11822	11864	1130	10538	10803	1162	55	15	0	0	0	0	0	0	0	0	0	0	0	0	0	0	0	0	0	0	0	0	0	0	0	0	0	0	0	0	0.000	0.000	0.000	0.000	0.000	0.000
28	5	5	guanine nucleotide binding protein (G protein); gamma transducing activity polypeptide 1	P000576	15997	32229	400	11308	11229	552	10280	10441	681	69	24	0	0	0	0	0	0	0	0	0	0	0	0	0	0	0	0	0	0	0	0	0	0	0	0	0	0	0	0	0.000	0.000	0.000	0.000	0.000	0.000
28	6	5	guanine nucleotide binding protein (G protein); gamma transducing activity polypeptide 1	P000576	16594	32229	400	11308	11189	610	10024	10298	780	71	22	0	0	0	0	0	0	0	0	0	0	0	0	0	0	0	0	0	0	0	0	0	0	0	0	0	0	0	0	0.000	0.000	0.000	0.000	0.000	0.000
29	1	1	Cy5/Cy3 labeled biotin-BSA marker proteins	n/a	2879	32874	400	12080	12599	1752	12080	12202	917	26	17	0	0	0	0	0	0	0	0	0	0	0	0	0	0	0	0	0	0	0	0	0	0	0	0	0	0	0	0	0.000	0.000	0.000	0.000	0.000	0.000
29	2	1	Cy5/Cy3 labeled biotin-BSA marker proteins	n/a	3476	32874	400	12336	12437	1259	12080	11973	857	32	18	0	0	0	0	0	0	0	0	0	0	0	0	0	0	0	0	0	0	0	0	0	0	0	0	0	0	0	0	0.000	0.000	0.000	0.000	0.000	0.000
29	3	1	empty	empty	4074	32874	400	12080	12912	2869	11566	11698	685	43	22	0	0	0	0	0	0	0	0	0	0	0	0	0	0	0	0	0	0	0	0	0	0	0	0	0	0	0	0	0.000	0.000	0.000	0.000	0.000	0.000
29	4	1	empty	empty	4671	32874	400	12080	12120	889	11566	11633	740	41	19	0	0	0	0	0	0	0	0	0	0	0	0	0	0	0	0	0	0	0	0	0	0	0	0	0	0	0	0	0.000	0.000	0.000	0.000	0.000	0.000
29	5	1	empty	empty	5269	32874	400	11566	11735	780	11822	11847	786	15	5	0	0	0	0	0	0	0	0	0	0	0	0	0	0	0	0	0	0	0	0	0	0	0	0	0	0	0	0	0.000	0.000	0.000	0.000	0.000	0.000
29	6	1	empty	empty	5866	32874	400	12850	12958	725	11822	11760	522	75	47	0	0	0	0	0	0	0	0	0	0	0	0	0	0	0	0	0	0	0	0	0	0	0	0	0	0	0	0	0.000	0.000	0.000	0.000	0.000	0.000
29	1	2	v-raf murine sarcoma 3611 viral oncogene homolog 1	P000056	2879	33628	400	13878	13730	1061	11822	11802	781	77	59	0	0	0	0	0	0	0	0	0	0	0	0	0	0	0	0	0	0	0	0	0	0	0	0	0	0	0	0	0.000	0.000	0.000	0.000	0.000	0.000
29	2	2	v-raf murine sarcoma 3611 viral oncogene homolog 1	P000056	3476	33628	400	13622	13376	1018	12080	12191	766	72	54	0	0	0	0	0	0	0	0	0	0	0	0	0	0	0	0	0	0	0	0	0	0	0	0	0	0	0	0	0.000	0.000	0.000	0.000	0.000	0.000
29	3	2	v-raf murine sarcoma 3611 viral oncogene homolog 1	P000056	4074	33628	400	13364	13476	1127	11566	11993	1195	74	35	0	0	0	0	0	0	0	0	0	0	0	0	0	0	0	0	0	0	0	0	0	0	0	0	0	0	0	0	0.000	0.000	0.000	0.000	0.000	0.000
29	4	2	v-raf murine sarcoma 3611 viral oncogene homolog 1	P000056	4671	33628	400	13108	13313	797	11822	11769	890	81	34	0	0	0	0	0	0	0	0	0	0	0	0	0	0	0	0	0	0	0	0	0	0	0	0	0	0	0	0	0.000	0.000	0.000	0.000	0.000	0.000
29	5	2	abl-interactor 1	P000199	5269	33628	400	20046	19905	4577	11822	11740	924	94	91	0	0	0	0	0	0	0	0	0	0	0	0	0	0	0	0	0	0	0	0	0	0	0	0	0	0	0	0	0.000	0.000	0.000	0.000	0.000	0.000
29	6	2	abl-interactor 1	P000199	5866	33628	400	19532	19360	2176	11822	11753	692	100	100	0	0	0	0	0	0	0	0	0	0	0	0	0	0	0	0	0	0	0	0	0	0	0	0	0	0	0	0	0.000	0.000	0.000	0.000	0.000	0.000
29	1	3	abl-interactor 1	P000199	2879	34381	400	20818	20274	3898	11822	11800	696	99	96	0	0	0	0	0	0	0	0	0	0	0	0	0	0	0	0	0	0	0	0	0	0	0	0	0	0	0	0	0.000	0.000	0.000	0.000	0.000	0.000
29	2	3	abl-interactor 1	P000199	3476	34381	400	15934	16370	2436	12080	12120	703	98	93	0	0	0	0	0	0	0	0	0	0	0	0	0	0	0	0	0	0	0	0	0	0	0	0	0	0	0	0	0.000	0.000	0.000	0.000	0.000	0.000
29	3	3	calponin 1; basic; smooth muscle	P000342	4074	34381	400	17476	17549	2880	11822	12193	1396	93	84	0	0	0	0	0	0	0	0	0	0	0	0	0	0	0	0	0	0	0	0	0	0	0	0	0	0	0	0	0.000	0.000	0.000	0.000	0.000	0.000
29	4	3	calponin 1; basic; smooth muscle	P000342	4671	34381	400	17476	17511	3170	11566	11546	977	94	87	0	0	0	0	0	0	0	0	0	0	0	0	0	0	0	0	0	0	0	0	0	0	0	0	0	0	0	0	0.000	0.000	0.000	0.000	0.000	0.000
29	5	3	calponin 1; basic; smooth muscle	P000342	5269	34381	400	16834	17084	3070	11566	11735	1391	93	81	0	0	0	0	0	0	0	0	0	0	0	0	0	0	0	0	0	0	0	0	0	0	0	0	0	0	0	0	0.000	0.000	0.000	0.000	0.000	0.000
29	6	3	calponin 1; basic; smooth muscle	P000342	5866	34381	400	16962	16946	2813	11308	11457	870	95	91	0	0	0	0	0	0	0	0	0	0	0	0	0	0	0	0	0	0	0	0	0	0	0	0	0	0	0	0	0.000	0.000	0.000	0.000	0.000	0.000
29	1	4	guanine nucleotide binding protein (G protein); beta polypeptide 3	P000444	2879	35135	400	14392	15560	3101	12336	13086	2054	57	25	0	0	0	0	0	0	0	0	0	0	0	0	0	0	0	0	0	0	0	0	0	0	0	0	0	0	0	0	0.000	0.000	0.000	0.000	0.000	0.000
29	2	4	guanine nucleotide binding protein (G protein); beta polypeptide 3	P000444	3476	35135	400	13622	13481	1104	12336	12755	1223	56	9	0	0	0	0	0	0	0	0	0	0	0	0	0	0	0	0	0	0	0	0	0	0	0	0	0	0	0	0	0.000	0.000	0.000	0.000	0.000	0.000
29	3	4	guanine nucleotide binding protein (G protein); beta polypeptide 3	P000444	4074	35135	400	13108	13192	1378	12080	12546	1297	41	13	0	0	0	0	0	0	0	0	0	0	0	0	0	0	0	0	0	0	0	0	0	0	0	0	0	0	0	0	0.000	0.000	0.000	0.000	0.000	0.000
29	4	4	guanine nucleotide binding protein (G protein); beta polypeptide 3	P000444	4671	35135	400	13364	13674	1704	11822	13066	4735	8	0	0	0	0	0	0	0	0	0	0	0	0	0	0	0	0	0	0	0	0	0	0	0	0	0	0	0	0	0	0.000	0.000	0.000	0.000	0.000	0.000
29	5	4	stathmin 1/oncoprotein 18	P000555	5269	35135	400	14392	14273	850	12336	15504	7844	0	0	0	0	0	0	0	0	0	0	0	0	0	0	0	0	0	0	0	0	0	0	0	0	0	0	0	0	0	0	0.000	0.000	0.000	0.000	0.000	0.000
29	6	4	stathmin 1/oncoprotein 18	P000555	5866	35135	400	14650	14119	1349	11822	12327	2029	65	4	0	0	0	0	0	0	0	0	0	0	0	0	0	0	0	0	0	0	0	0	0	0	0	0	0	0	0	0	0.000	0.000	0.000	0.000	0.000	0.000
29	1	5	stathmin 1/oncoprotein 18	P000555	2879	35888	400	14906	14818	1428	12594	13351	2164	56	9	0	0	0	0	0	0	0	0	0	0	0	0	0	0	0	0	0	0	0	0	0	0	0	0	0	0	0	0	0.000	0.000	0.000	0.000	0.000	0.000
29	2	5	stathmin 1/oncoprotein 18	P000555	3476	35888	400	15420	15132	1789	12336	12342	1068	83	67	0	0	0	0	0	0	0	0	0	0	0	0	0	0	0	0	0	0	0	0	0	0	0	0	0	0	0	0	0.000	0.000	0.000	0.000	0.000	0.000
29	3	5	Buffer	n/a	4074	35888	400	12080	12032	711	12080	12742	2299	0	0	0	0	0	0	0	0	0	0	0	0	0	0	0	0	0	0	0	0	0	0	0	0	0	0	0	0	0	0	0.000	0.000	0.000	0.000	0.000	0.000
29	4	5	Buffer	n/a	4671	35888	400	11566	11662	627	12080	12183	868	0	0	0	0	0	0	0	0	0	0	0	0	0	0	0	0	0	0	0	0	0	0	0	0	0	0	0	0	0	0	0.000	0.000	0.000	0.000	0.000	0.000
29	5	5	Buffer	n/a	5269	35888	400	11308	11370	849	12080	12202	1114	3	0	0	0	0	0	0	0	0	0	0	0	0	0	0	0	0	0	0	0	0	0	0	0	0	0	0	0	0	0	0.000	0.000	0.000	0.000	0.000	0.000
29	6	5	Buffer	n/a	5866	35888	400	13364	13396	790	11822	11787	502	96	81	0	0	0	0	0	0	0	0	0	0	0	0	0	0	0	0	0	0	0	0	0	0	0	0	0	0	0	0	0.000	0.000	0.000	0.000	0.000	0.000
30	1	1	BSA2	n/a	6438	32898	400	12336	13267	3493	12080	12278	1478	17	14	0	0	0	0	0	0	0	0	0	0	0	0	0	0	0	0	0	0	0	0	0	0	0	0	0	0	0	0	0.000	0.000	0.000	0.000	0.000	0.000
30	2	1	BSA2	n/a	7035	32898	400	12080	12201	715	11822	11736	620	32	14	0	0	0	0	0	0	0	0	0	0	0	0	0	0	0	0	0	0	0	0	0	0	0	0	0	0	0	0	0.000	0.000	0.000	0.000	0.000	0.000
30	3	1	empty	empty	7633	32898	400	12336	12426	1156	12080	12067	567	33	24	0	0	0	0	0	0	0	0	0	0	0	0	0	0	0	0	0	0	0	0	0	0	0	0	0	0	0	0	0.000	0.000	0.000	0.000	0.000	0.000
30	4	1	empty	empty	8230	32898	400	11822	11937	717	11822	11828	677	28	1	0	0	0	0	0	0	0	0	0	0	0	0	0	0	0	0	0	0	0	0	0	0	0	0	0	0	0	0	0.000	0.000	0.000	0.000	0.000	0.000
30	5	1	empty	empty	8828	32898	400	11822	11918	691	11308	12081	2557	0	0	0	0	0	0	0	0	0	0	0	0	0	0	0	0	0	0	0	0	0	0	0	0	0	0	0	0	0	0	0.000	0.000	0.000	0.000	0.000	0.000
30	6	1	empty	empty	9425	32898	400	12336	12734	2023	11566	12508	3450	14	0	0	0	0	0	0	0	0	0	0	0	0	0	0	0	0	0	0	0	0	0	0	0	0	0	0	0	0	0	0.000	0.000	0.000	0.000	0.000	0.000
30	1	2	protein kinase; cAMP-dependent; catalytic; beta	P000034	6438	33652	400	12336	12347	767	11566	11609	951	36	9	0	0	0	0	0	0	0	0	0	0	0	0	0	0	0	0	0	0	0	0	0	0	0	0	0	0	0	0	0.000	0.000	0.000	0.000	0.000	0.000
30	2	2	protein kinase; cAMP-dependent; catalytic; beta	P000034	7035	33652	400	13364	13329	905	11822	11944	1222	59	17	0	0	0	0	0	0	0	0	0	0	0	0	0	0	0	0	0	0	0	0	0	0	0	0	0	0	0	0	0.000	0.000	0.000	0.000	0.000	0.000
30	3	2	protein kinase; cAMP-dependent; catalytic; beta	P000034	7633	33652	400	12080	12157	613	11822	12147	1416	5	0	0	0	0	0	0	0	0	0	0	0	0	0	0	0	0	0	0	0	0	0	0	0	0	0	0	0	0	0	0.000	0.000	0.000	0.000	0.000	0.000
30	4	2	protein kinase; cAMP-dependent; catalytic; beta	P000034	8230	33652	400	13108	12937	977	11566	11649	779	72	46	0	0	0	0	0	0	0	0	0	0	0	0	0	0	0	0	0	0	0	0	0	0	0	0	0	0	0	0	0.000	0.000	0.000	0.000	0.000	0.000
30	5	2	v-Ha-ras Harvey rat sarcoma viral oncogene homolog	P000143	8828	33652	400	15164	15227	1844	11566	11994	1877	84	48	0	0	0	0	0	0	0	0	0	0	0	0	0	0	0	0	0	0	0	0	0	0	0	0	0	0	0	0	0.000	0.000	0.000	0.000	0.000	0.000
30	6	2	v-Ha-ras Harvey rat sarcoma viral oncogene homolog	P000143	9425	33652	400	14778	14955	1944	11052	11478	2447	75	30	0	0	0	0	0	0	0	0	0	0	0	0	0	0	0	0	0	0	0	0	0	0	0	0	0	0	0	0	0.000	0.000	0.000	0.000	0.000	0.000
30	1	3	v-Ha-ras Harvey rat sarcoma viral oncogene homolog	P000143	6438	34405	400	15934	15447	1673	11566	11595	481	98	93	0	0	0	0	0	0	0	0	0	0	0	0	0	0	0	0	0	0	0	0	0	0	0	0	0	0	0	0	0.000	0.000	0.000	0.000	0.000	0.000
30	2	3	v-Ha-ras Harvey rat sarcoma viral oncogene homolog	P000143	7035	34405	400	14650	14426	1326	11566	11475	833	90	83	0	0	0	0	0	0	0	0	0	0	0	0	0	0	0	0	0	0	0	0	0	0	0	0	0	0	0	0	0.000	0.000	0.000	0.000	0.000	0.000
30	3	3	suppressor of cytokine signaling 4	P000324	7633	34405	400	13878	13651	1149	11566	12001	2372	45	0	0	0	0	0	0	0	0	0	0	0	0	0	0	0	0	0	0	0	0	0	0	0	0	0	0	0	0	0	0.000	0.000	0.000	0.000	0.000	0.000
30	4	3	suppressor of cytokine signaling 4	P000324	8230	34405	400	13108	13149	1172	11566	11711	960	73	40	0	0	0	0	0	0	0	0	0	0	0	0	0	0	0	0	0	0	0	0	0	0	0	0	0	0	0	0	0.000	0.000	0.000	0.000	0.000	0.000
30	5	3	suppressor of cytokine signaling 4	P000324	8828	34405	400	13364	13231	914	11566	11602	975	75	47	0	0	0	0	0	0	0	0	0	0	0	0	0	0	0	0	0	0	0	0	0	0	0	0	0	0	0	0	0.000	0.000	0.000	0.000	0.000	0.000
30	6	3	suppressor of cytokine signaling 4	P000324	9425	34405	400	12850	12589	1220	10794	11938	3642	4	0	0	0	0	0	0	0	0	0	0	0	0	0	0	0	0	0	0	0	0	0	0	0	0	0	0	0	0	0	0.000	0.000	0.000	0.000	0.000	0.000
30	1	4	mitogen-activated protein kinase-activated protein kinase 3	P000424	6438	35159	400	14650	14417	1214	11822	12109	1530	80	41	0	0	0	0	0	0	0	0	0	0	0	0	0	0	0	0	0	0	0	0	0	0	0	0	0	0	0	0	0.000	0.000	0.000	0.000	0.000	0.000
30	2	4	mitogen-activated protein kinase-activated protein kinase 3	P000424	7035	35159	400	14392	13961	1718	11566	11725	1330	73	54	0	0	0	0	0	0	0	0	0	0	0	0	0	0	0	0	0	0	0	0	0	0	0	0	0	0	0	0	0.000	0.000	0.000	0.000	0.000	0.000
30	3	4	mitogen-activated protein kinase-activated protein kinase 3	P000424	7633	35159	400	14136	14358	2016	11822	11940	1232	74	49	0	0	0	0	0	0	0	0	0	0	0	0	0	0	0	0	0	0	0	0	0	0	0	0	0	0	0	0	0.000	0.000	0.000	0.000	0.000	0.000
30	4	4	mitogen-activated protein kinase-activated protein kinase 3	P000424	8230	35159	400	13878	13639	1370	11566	11667	740	84	72	0	0	0	0	0	0	0	0	0	0	0	0	0	0	0	0	0	0	0	0	0	0	0	0	0	0	0	0	0.000	0.000	0.000	0.000	0.000	0.000
30	5	4	hypoxia-inducible factor 1; alpha subunit (basic helix-loop-helix transcript	P000526	8828	35159	400	12336	12227	919	11052	11391	1355	44	2	0	0	0	0	0	0	0	0	0	0	0	0	0	0	0	0	0	0	0	0	0	0	0	0	0	0	0	0	0.000	0.000	0.000	0.000	0.000	0.000
30	6	4	hypoxia-inducible factor 1; alpha subunit (basic helix-loop-helix transcript	P000526	9425	35159	400	13108	13898	2681	11308	11924	1966	48	24	0	0	0	0	0	0	0	0	0	0	0	0	0	0	0	0	0	0	0	0	0	0	0	0	0	0	0	0	0.000	0.000	0.000	0.000	0.000	0.000
30	1	5	hypoxia-inducible factor 1; alpha subunit (basic helix-loop-helix transcript	P000526	6438	35912	400	13108	13024	700	11566	11617	640	85	68	0	0	0	0	0	0	0	0	0	0	0	0	0	0	0	0	0	0	0	0	0	0	0	0	0	0	0	0	0.000	0.000	0.000	0.000	0.000	0.000
30	2	5	hypoxia-inducible factor 1; alpha subunit (basic helix-loop-helix transcript	P000526	7035	35912	400	12594	12804	2067	11822	11816	625	54	46	0	0	0	0	0	0	0	0	0	0	0	0	0	0	0	0	0	0	0	0	0	0	0	0	0	0	0	0	0.000	0.000	0.000	0.000	0.000	0.000
30	3	5	Buffer	n/a	7633	35912	400	11566	11628	753	11822	12323	2354	0	0	0	0	0	0	0	0	0	0	0	0	0	0	0	0	0	0	0	0	0	0	0	0	0	0	0	0	0	0	0.000	0.000	0.000	0.000	0.000	0.000
30	4	5	Buffer	n/a	8230	35912	400	11308	11437	789	11566	11641	649	14	6	0	0	0	0	0	0	0	0	0	0	0	0	0	0	0	0	0	0	0	0	0	0	0	0	0	0	0	0	0.000	0.000	0.000	0.000	0.000	0.000
30	5	5	Buffer	n/a	8828	35912	400	11308	11541	1110	11052	11851	2164	10	0	0	0	0	0	0	0	0	0	0	0	0	0	0	0	0	0	0	0	0	0	0	0	0	0	0	0	0	0	0.000	0.000	0.000	0.000	0.000	0.000
30	6	5	Buffer	n/a	9425	35912	400	11052	11220	754	11566	11801	1718	2	0	0	0	0	0	0	0	0	0	0	0	0	0	0	0	0	0	0	0	0	0	0	0	0	0	0	0	0	0	0.000	0.000	0.000	0.000	0.000	0.000
31	1	1	Nonphosphopeptide2	empty	10072	32874	400	11566	11480	753	11052	11141	821	26	6	0	0	0	0	0	0	0	0	0	0	0	0	0	0	0	0	0	0	0	0	0	0	0	0	0	0	0	0	0.000	0.000	0.000	0.000	0.000	0.000
31	2	1	Nonphosphopeptide2	empty	10669	32874	400	11822	11658	727	10538	10513	652	82	44	0	0	0	0	0	0	0	0	0	0	0	0	0	0	0	0	0	0	0	0	0	0	0	0	0	0	0	0	0.000	0.000	0.000	0.000	0.000	0.000
31	3	1	empty	empty	11267	32874	400	10538	10565	764	11566	14310	6846	0	0	0	0	0	0	0	0	0	0	0	0	0	0	0	0	0	0	0	0	0	0	0	0	0	0	0	0	0	0	0.000	0.000	0.000	0.000	0.000	0.000
31	4	1	empty	empty	11864	32874	400	11052	11992	3871	10666	11025	1856	14	10	0	0	0	0	0	0	0	0	0	0	0	0	0	0	0	0	0	0	0	0	0	0	0	0	0	0	0	0	0.000	0.000	0.000	0.000	0.000	0.000
31	5	1	empty	empty	12462	32874	400	11052	10958	2688	11052	11151	1114	20	5	0	0	0	0	0	0	0	0	0	0	0	0	0	0	0	0	0	0	0	0	0	0	0	0	0	0	0	0	0.000	0.000	0.000	0.000	0.000	0.000
31	6	1	empty	empty	13059	32874	400	11822	12018	1175	10794	10946	653	63	43	0	0	0	0	0	0	0	0	0	0	0	0	0	0	0	0	0	0	0	0	0	0	0	0	0	0	0	0	0.000	0.000	0.000	0.000	0.000	0.000
31	1	2	mitogen-activated protein kinase kinase 6; transcript variant 1	P000017	10072	33628	400	13364	15846	5838	11308	11184	837	77	60	0	0	0	0	0	0	0	0	0	0	0	0	0	0	0	0	0	0	0	0	0	0	0	0	0	0	0	0	0.000	0.000	0.000	0.000	0.000	0.000
31	2	2	mitogen-activated protein kinase kinase 6; transcript variant 1	P000017	10669	33628	400	12850	12972	1391	11052	11623	2425	36	4	0	0	0	0	0	0	0	0	0	0	0	0	0	0	0	0	0	0	0	0	0	0	0	0	0	0	0	0	0.000	0.000	0.000	0.000	0.000	0.000
31	3	2	mitogen-activated protein kinase kinase 6; transcript variant 1	P000017	11267	33628	400	12080	11974	818	10923	10903	1220	45	4	0	0	0	0	0	0	0	0	0	0	0	0	0	0	0	0	0	0	0	0	0	0	0	0	0	0	0	0	0.000	0.000	0.000	0.000	0.000	0.000
31	4	2	mitogen-activated protein kinase kinase 6; transcript variant 1	P000017	11864	33628	400	13622	14161	2594	11052	11051	862	78	62	0	0	0	0	0	0	0	0	0	0	0	0	0	0	0	0	0	0	0	0	0	0	0	0	0	0	0	0	0.000	0.000	0.000	0.000	0.000	0.000
31	5	2	ems1 sequence (mammary tumor and squamous cell carcinoma-associated (p80/85	P000100	12462	33628	400	10794	11201	1254	10794	10821	742	23	12	0	0	0	0	0	0	0	0	0	0	0	0	0	0	0	0	0	0	0	0	0	0	0	0	0	0	0	0	0.000	0.000	0.000	0.000	0.000	0.000
31	6	2	ems1 sequence (mammary tumor and squamous cell carcinoma-associated (p80/85	P000100	13059	33628	400	12336	12360	694	11308	11282	773	57	19	0	0	0	0	0	0	0	0	0	0	0	0	0	0	0	0	0	0	0	0	0	0	0	0	0	0	0	0	0.000	0.000	0.000	0.000	0.000	0.000
31	1	3	ems1 sequence (mammary tumor and squamous cell carcinoma-associated (p80/85	P000100	10072	34381	400	12850	14859	4763	10794	11926	4397	29	19	0	0	0	0	0	0	0	0	0	0	0	0	0	0	0	0	0	0	0	0	0	0	0	0	0	0	0	0	0.000	0.000	0.000	0.000	0.000	0.000
31	2	3	ems1 sequence (mammary tumor and squamous cell carcinoma-associated (p80/85	P000100	10669	34381	400	13622	14222	2972	11566	12905	4064	24	8	0	0	0	0	0	0	0	0	0	0	0	0	0	0	0	0	0	0	0	0	0	0	0	0	0	0	0	0	0.000	0.000	0.000	0.000	0.000	0.000
31	3	3	guanine nucleotide binding protein (G protein); gamma 11	P000305	11267	34381	400	11566	11773	1252	10538	10600	652	67	29	0	0	0	0	0	0	0	0	0	0	0	0	0	0	0	0	0	0	0	0	0	0	0	0	0	0	0	0	0.000	0.000	0.000	0.000	0.000	0.000
31	4	3	guanine nucleotide binding protein (G protein); gamma 11	P000305	11864	34381	400	12594	13702	3033	10794	10971	1489	58	35	0	0	0	0	0	0	0	0	0	0	0	0	0	0	0	0	0	0	0	0	0	0	0	0	0	0	0	0	0.000	0.000	0.000	0.000	0.000	0.000
31	5	3	guanine nucleotide binding protein (G protein); gamma 11	P000305	12462	34381	400	11566	12459	2453	11052	10965	1556	31	20	0	0	0	0	0	0	0	0	0	0	0	0	0	0	0	0	0	0	0	0	0	0	0	0	0	0	0	0	0.000	0.000	0.000	0.000	0.000	0.000
31	6	3	guanine nucleotide binding protein (G protein); gamma 11	P000305	13059	34381	400	12336	12171	1088	11052	11016	832	60	38	0	0	0	0	0	0	0	0	0	0	0	0	0	0	0	0	0	0	0	0	0	0	0	0	0	0	0	0	0.000	0.000	0.000	0.000	0.000	0.000
31	1	4	fibroblast growth factor 1 (acidic)	P000397	10072	35135	400	13622	20263	12263	10280	11683	4151	47	40	0	0	0	0	0	0	0	0	0	0	0	0	0	0	0	0	0	0	0	0	0	0	0	0	0	0	0	0	0.000	0.000	0.000	0.000	0.000	0.000
31	2	4	fibroblast growth factor 1 (acidic)	P000397	10669	35135	400	11308	11328	513	11052	10981	1322	0	0	0	0	0	0	0	0	0	0	0	0	0	0	0	0	0	0	0	0	0	0	0	0	0	0	0	0	0	0	0.000	0.000	0.000	0.000	0.000	0.000
31	3	4	fibroblast growth factor 1 (acidic)	P000397	11267	35135	400	12080	12249	1171	11052	11003	722	64	38	0	0	0	0	0	0	0	0	0	0	0	0	0	0	0	0	0	0	0	0	0	0	0	0	0	0	0	0	0.000	0.000	0.000	0.000	0.000	0.000
31	4	4	fibroblast growth factor 1 (acidic)	P000397	11864	35135	400	12080	12053	1432	11308	11613	1192	42	11	0	0	0	0	0	0	0	0	0	0	0	0	0	0	0	0	0	0	0	0	0	0	0	0	0	0	0	0	0.000	0.000	0.000	0.000	0.000	0.000
31	5	4	cell division cycle 25B; transcript variant 3	P000500	12462	35135	400	12594	13215	2318	10794	10884	627	85	70	0	0	0	0	0	0	0	0	0	0	0	0	0	0	0	0	0	0	0	0	0	0	0	0	0	0	0	0	0.000	0.000	0.000	0.000	0.000	0.000
31	6	4	cell division cycle 25B; transcript variant 3	P000500	13059	35135	400	12336	12549	1613	10794	10802	734	71	52	0	0	0	0	0	0	0	0	0	0	0	0	0	0	0	0	0	0	0	0	0	0	0	0	0	0	0	0	0.000	0.000	0.000	0.000	0.000	0.000
31	1	5	cell division cycle 25B; transcript variant 3	P000500	10072	35888	400	12594	12429	1189	11052	11101	682	74	54	0	0	0	0	0	0	0	0	0	0	0	0	0	0	0	0	0	0	0	0	0	0	0	0	0	0	0	0	0.000	0.000	0.000	0.000	0.000	0.000
31	2	5	cell division cycle 25B; transcript variant 3	P000500	10669	35888	400	11822	11572	937	10794	10946	843	51	19	0	0	0	0	0	0	0	0	0	0	0	0	0	0	0	0	0	0	0	0	0	0	0	0	0	0	0	0	0.000	0.000	0.000	0.000	0.000	0.000
31	3	5	nuclear receptor subfamily 1; group I; member 2	P000920	11267	35888	400	12080	12645	2233	10794	10940	828	59	41	0	0	0	0	0	0	0	0	0	0	0	0	0	0	0	0	0	0	0	0	0	0	0	0	0	0	0	0	0.000	0.000	0.000	0.000	0.000	0.000
31	4	5	nuclear receptor subfamily 1; group I; member 2	P000920	11864	35888	400	12080	13307	3236	10794	11114	1183	53	35	0	0	0	0	0	0	0	0	0	0	0	0	0	0	0	0	0	0	0	0	0	0	0	0	0	0	0	0	0.000	0.000	0.000	0.000	0.000	0.000
31	5	5	nuclear receptor subfamily 1; group I; member 2	P000920	12462	35888	400	11822	12452	1853	10794	10730	723	75	41	0	0	0	0	0	0	0	0	0	0	0	0	0	0	0	0	0	0	0	0	0	0	0	0	0	0	0	0	0.000	0.000	0.000	0.000	0.000	0.000
31	6	5	nuclear receptor subfamily 1; group I; member 2	P000920	13059	35888	400	11566	11508	874	11308	11254	733	34	7	0	0	0	0	0	0	0	0	0	0	0	0	0	0	0	0	0	0	0	0	0	0	0	0	0	0	0	0	0.000	0.000	0.000	0.000	0.000	0.000
32	1	1	Cy5/Cy3 labeled biotin-BSA marker proteins	n/a	13657	32874	400	10280	10541	787	10538	10654	511	31	18	0	0	0	0	0	0	0	0	0	0	0	0	0	0	0	0	0	0	0	0	0	0	0	0	0	0	0	0	0.000	0.000	0.000	0.000	0.000	0.000
32	2	1	Cy5/Cy3 labeled biotin-BSA marker proteins	n/a	14254	32874	400	11308	11345	910	10794	11046	998	15	5	0	0	0	0	0	0	0	0	0	0	0	0	0	0	0	0	0	0	0	0	0	0	0	0	0	0	0	0	0.000	0.000	0.000	0.000	0.000	0.000
32	3	1	empty	empty	14852	32874	400	11308	11976	2045	11052	11010	813	34	27	0	0	0	0	0	0	0	0	0	0	0	0	0	0	0	0	0	0	0	0	0	0	0	0	0	0	0	0	0.000	0.000	0.000	0.000	0.000	0.000
32	4	1	empty	empty	15449	32874	400	10794	10882	1056	10794	10986	1372	10	5	0	0	0	0	0	0	0	0	0	0	0	0	0	0	0	0	0	0	0	0	0	0	0	0	0	0	0	0	0.000	0.000	0.000	0.000	0.000	0.000
32	5	1	empty	empty	16047	32874	400	10280	10216	578	10024	9988	486	36	15	0	0	0	0	0	0	0	0	0	0	0	0	0	0	0	0	0	0	0	0	0	0	0	0	0	0	0	0	0.000	0.000	0.000	0.000	0.000	0.000
32	6	1	empty	empty	16644	32874	400	10794	10902	769	10024	10080	631	57	38	0	0	0	0	0	0	0	0	0	0	0	0	0	0	0	0	0	0	0	0	0	0	0	0	0	0	0	0	0.000	0.000	0.000	0.000	0.000	0.000
32	1	2	Buffer	n/a	13657	33628	400	10794	10865	778	11052	11040	754	14	2	0	0	0	0	0	0	0	0	0	0	0	0	0	0	0	0	0	0	0	0	0	0	0	0	0	0	0	0	0.000	0.000	0.000	0.000	0.000	0.000
32	2	2	Buffer	n/a	14254	33628	400	10538	10681	463	11052	11328	1442	0	0	0	0	0	0	0	0	0	0	0	0	0	0	0	0	0	0	0	0	0	0	0	0	0	0	0	0	0	0	0.000	0.000	0.000	0.000	0.000	0.000
32	3	2	Buffer	n/a	14852	33628	400	10280	10269	464	10280	10409	931	1	0	0	0	0	0	0	0	0	0	0	0	0	0	0	0	0	0	0	0	0	0	0	0	0	0	0	0	0	0	0.000	0.000	0.000	0.000	0.000	0.000
32	4	2	Buffer	n/a	15449	33628	400	10280	10425	619	10280	10397	726	21	2	0	0	0	0	0	0	0	0	0	0	0	0	0	0	0	0	0	0	0	0	0	0	0	0	0	0	0	0	0.000	0.000	0.000	0.000	0.000	0.000
32	5	2	mitogen-activated protein kinase kinase 5; transcript variant A	P000081	16047	33628	400	11052	11575	2009	10024	10062	662	72	33	0	0	0	0	0	0	0	0	0	0	0	0	0	0	0	0	0	0	0	0	0	0	0	0	0	0	0	0	0.000	0.000	0.000	0.000	0.000	0.000
32	6	2	mitogen-activated protein kinase kinase 5; transcript variant A	P000081	16644	33628	400	10794	10762	685	10280	10278	769	45	7	0	0	0	0	0	0	0	0	0	0	0	0	0	0	0	0	0	0	0	0	0	0	0	0	0	0	0	0	0.000	0.000	0.000	0.000	0.000	0.000
32	1	3	mitogen-activated protein kinase kinase 5; transcript variant A	P000081	13657	34381	400	12336	13146	2406	10794	10806	671	62	52	0	0	0	0	0	0	0	0	0	0	0	0	0	0	0	0	0	0	0	0	0	0	0	0	0	0	0	0	0.000	0.000	0.000	0.000	0.000	0.000
32	2	3	mitogen-activated protein kinase kinase 5; transcript variant A	P000081	14254	34381	400	11308	11356	655	10794	10680	687	47	10	0	0	0	0	0	0	0	0	0	0	0	0	0	0	0	0	0	0	0	0	0	0	0	0	0	0	0	0	0.000	0.000	0.000	0.000	0.000	0.000
32	3	3	vav 1 oncogene	P000279	14852	34381	400	11052	11216	526	10538	10541	968	30	2	0	0	0	0	0	0	0	0	0	0	0	0	0	0	0	0	0	0	0	0	0	0	0	0	0	0	0	0	0.000	0.000	0.000	0.000	0.000	0.000
32	4	3	vav 1 oncogene	P000279	15449	34381	400	11052	11157	893	10538	10564	685	42	17	0	0	0	0	0	0	0	0	0	0	0	0	0	0	0	0	0	0	0	0	0	0	0	0	0	0	0	0	0.000	0.000	0.000	0.000	0.000	0.000
32	5	3	vav 1 oncogene	P000279	16047	34381	400	10794	11144	1488	10280	10301	821	27	14	0	0	0	0	0	0	0	0	0	0	0	0	0	0	0	0	0	0	0	0	0	0	0	0	0	0	0	0	0.000	0.000	0.000	0.000	0.000	0.000
32	6	3	vav 1 oncogene	P000279	16644	34381	400	10280	10337	706	10280	10191	631	24	4	0	0	0	0	0	0	0	0	0	0	0	0	0	0	0	0	0	0	0	0	0	0	0	0	0	0	0	0	0.000	0.000	0.000	0.000	0.000	0.000
32	1	4	protein phosphatase 1A (formerly 2C); magnesium-dependent; alpha isoform	P000364	13657	35135	400	11566	13820	4895	11052	10876	607	47	39	0	0	0	0	0	0	0	0	0	0	0	0	0	0	0	0	0	0	0	0	0	0	0	0	0	0	0	0	0.000	0.000	0.000	0.000	0.000	0.000
32	2	4	protein phosphatase 1A (formerly 2C); magnesium-dependent; alpha isoform	P000364	14254	35135	400	11822	11701	1134	10794	10552	663	65	37	0	0	0	0	0	0	0	0	0	0	0	0	0	0	0	0	0	0	0	0	0	0	0	0	0	0	0	0	0.000	0.000	0.000	0.000	0.000	0.000
32	3	4	protein phosphatase 1A (formerly 2C); magnesium-dependent; alpha isoform	P000364	14852	35135	400	11052	11202	1330	10794	10836	634	40	25	0	0	0	0	0	0	0	0	0	0	0	0	0	0	0	0	0	0	0	0	0	0	0	0	0	0	0	0	0.000	0.000	0.000	0.000	0.000	0.000
32	4	4	protein phosphatase 1A (formerly 2C); magnesium-dependent; alpha isoform	P000364	15449	35135	400	10538	10698	829	10538	10899	863	17	8	0	0	0	0	0	0	0	0	0	0	0	0	0	0	0	0	0	0	0	0	0	0	0	0	0	0	0	0	0.000	0.000	0.000	0.000	0.000	0.000
32	5	4	enolase 2; (gamma; neuronal)	P000474	16047	35135	400	11052	12216	2939	10024	10114	508	72	56	0	0	0	0	0	0	0	0	0	0	0	0	0	0	0	0	0	0	0	0	0	0	0	0	0	0	0	0	0.000	0.000	0.000	0.000	0.000	0.000
32	6	4	enolase 2; (gamma; neuronal)	P000474	16644	35135	400	10794	10797	1065	10024	10594	3568	0	0	0	0	0	0	0	0	0	0	0	0	0	0	0	0	0	0	0	0	0	0	0	0	0	0	0	0	0	0	0.000	0.000	0.000	0.000	0.000	0.000
32	1	5	enolase 2; (gamma; neuronal)	P000474	13657	35888	400	11566	11511	779	11308	11249	695	27	6	0	0	0	0	0	0	0	0	0	0	0	0	0	0	0	0	0	0	0	0	0	0	0	0	0	0	0	0	0.000	0.000	0.000	0.000	0.000	0.000
32	2	5	enolase 2; (gamma; neuronal)	P000474	14254	35888	400	11822	11688	514	10794	10918	853	51	5	0	0	0	0	0	0	0	0	0	0	0	0	0	0	0	0	0	0	0	0	0	0	0	0	0	0	0	0	0.000	0.000	0.000	0.000	0.000	0.000
32	3	5	high-mobility group box 2	P000578	14852	35888	400	12336	12250	986	10794	11888	3813	1	0	0	0	0	0	0	0	0	0	0	0	0	0	0	0	0	0	0	0	0	0	0	0	0	0	0	0	0	0	0.000	0.000	0.000	0.000	0.000	0.000
32	4	5	high-mobility group box 2	P000578	15449	35888	400	10794	11450	2395	10538	10388	546	34	27	0	0	0	0	0	0	0	0	0	0	0	0	0	0	0	0	0	0	0	0	0	0	0	0	0	0	0	0	0.000	0.000	0.000	0.000	0.000	0.000
32	5	5	high-mobility group box 2	P000578	16047	35888	400	11308	11245	765	10024	9856	685	74	41	0	0	0	0	0	0	0	0	0	0	0	0	0	0	0	0	0	0	0	0	0	0	0	0	0	0	0	0	0.000	0.000	0.000	0.000	0.000	0.000
32	6	5	high-mobility group box 2	P000578	16644	35888	400	11052	11164	1400	9510	9440	592	70	57	0	0	0	0	0	0	0	0	0	0	0	0	0	0	0	0	0	0	0	0	0	0	0	0	0	0	0	0	0.000	0.000	0.000	0.000	0.000	0.000
33	1	1	Cy5/Cy3 labeled biotin-BSA marker proteins	n/a	2829	36507	400	12336	12317	963	12336	12513	757	23	9	0	0	0	0	0	0	0	0	0	0	0	0	0	0	0	0	0	0	0	0	0	0	0	0	0	0	0	0	0.000	0.000	0.000	0.000	0.000	0.000
33	2	1	Cy5/Cy3 labeled biotin-BSA marker proteins	n/a	3426	36507	400	12080	12197	757	12080	12220	760	26	6	0	0	0	0	0	0	0	0	0	0	0	0	0	0	0	0	0	0	0	0	0	0	0	0	0	0	0	0	0.000	0.000	0.000	0.000	0.000	0.000
33	3	1	empty	empty	4024	36507	400	12080	12278	1402	12336	12313	981	13	7	0	0	0	0	0	0	0	0	0	0	0	0	0	0	0	0	0	0	0	0	0	0	0	0	0	0	0	0	0.000	0.000	0.000	0.000	0.000	0.000
33	4	1	empty	empty	4621	36507	400	11822	12063	972	12080	11982	822	20	7	0	0	0	0	0	0	0	0	0	0	0	0	0	0	0	0	0	0	0	0	0	0	0	0	0	0	0	0	0.000	0.000	0.000	0.000	0.000	0.000
33	5	1	empty	empty	5219	36507	400	11566	11725	1263	12336	12379	1139	10	5	0	0	0	0	0	0	0	0	0	0	0	0	0	0	0	0	0	0	0	0	0	0	0	0	0	0	0	0	0.000	0.000	0.000	0.000	0.000	0.000
33	6	1	empty	empty	5816	36507	400	12080	14106	4459	11822	11843	635	44	37	0	0	0	0	0	0	0	0	0	0	0	0	0	0	0	0	0	0	0	0	0	0	0	0	0	0	0	0	0.000	0.000	0.000	0.000	0.000	0.000
33	1	2	megakaryocyte-associated tyrosine kinase; transcript variant 1	P000057	2829	37261	400	16962	17154	1099	12594	12714	601	100	100	0	0	0	0	0	0	0	0	0	0	0	0	0	0	0	0	0	0	0	0	0	0	0	0	0	0	0	0	0.000	0.000	0.000	0.000	0.000	0.000
33	2	2	megakaryocyte-associated tyrosine kinase; transcript variant 1	P000057	3426	37261	400	16706	16507	1722	12594	12619	566	95	92	0	0	0	0	0	0	0	0	0	0	0	0	0	0	0	0	0	0	0	0	0	0	0	0	0	0	0	0	0.000	0.000	0.000	0.000	0.000	0.000
33	3	2	megakaryocyte-associated tyrosine kinase; transcript variant 1	P000057	4024	37261	400	18762	19115	3551	12336	12453	761	100	98	0	0	0	0	0	0	0	0	0	0	0	0	0	0	0	0	0	0	0	0	0	0	0	0	0	0	0	0	0.000	0.000	0.000	0.000	0.000	0.000
33	4	2	megakaryocyte-associated tyrosine kinase; transcript variant 1	P000057	4621	37261	400	15678	16409	3372	12080	12042	777	94	86	0	0	0	0	0	0	0	0	0	0	0	0	0	0	0	0	0	0	0	0	0	0	0	0	0	0	0	0	0.000	0.000	0.000	0.000	0.000	0.000
33	5	2	v-ets erythroblastosis virus E26 oncogene like (avian)	P000203	5219	37261	400	20560	20075	2348	11052	11106	1028	100	100	0	0	0	0	0	0	0	0	0	0	0	0	0	0	0	0	0	0	0	0	0	0	0	0	0	0	0	0	0.000	0.000	0.000	0.000	0.000	0.000
33	6	2	v-ets erythroblastosis virus E26 oncogene like (avian)	P000203	5816	37261	400	22874	22241	2815	11566	11530	862	100	100	0	0	0	0	0	0	0	0	0	0	0	0	0	0	0	0	0	0	0	0	0	0	0	0	0	0	0	0	0.000	0.000	0.000	0.000	0.000	0.000
33	1	3	v-ets erythroblastosis virus E26 oncogene like (avian)	P000203	2829	38014	400	21846	21334	2798	12336	12414	953	100	100	0	0	0	0	0	0	0	0	0	0	0	0	0	0	0	0	0	0	0	0	0	0	0	0	0	0	0	0	0.000	0.000	0.000	0.000	0.000	0.000
33	2	3	v-ets erythroblastosis virus E26 oncogene like (avian)	P000203	3426	38014	400	24416	27752	8483	12336	12371	756	100	100	0	0	0	0	0	0	0	0	0	0	0	0	0	0	0	0	0	0	0	0	0	0	0	0	0	0	0	0	0.000	0.000	0.000	0.000	0.000	0.000
33	3	3	GTP binding protein overexpressed in skeletal muscle; transcript variant 2	P000343	4024	38014	400	15678	15842	1442	12594	12594	1270	93	73	0	0	0	0	0	0	0	0	0	0	0	0	0	0	0	0	0	0	0	0	0	0	0	0	0	0	0	0	0.000	0.000	0.000	0.000	0.000	0.000
33	4	3	GTP binding protein overexpressed in skeletal muscle; transcript variant 2	P000343	4621	38014	400	14906	14817	1230	11822	11786	876	95	84	0	0	0	0	0	0	0	0	0	0	0	0	0	0	0	0	0	0	0	0	0	0	0	0	0	0	0	0	0.000	0.000	0.000	0.000	0.000	0.000
33	5	3	GTP binding protein overexpressed in skeletal muscle; transcript variant 2	P000343	5219	38014	400	15934	16742	2696	11822	11920	758	97	95	0	0	0	0	0	0	0	0	0	0	0	0	0	0	0	0	0	0	0	0	0	0	0	0	0	0	0	0	0.000	0.000	0.000	0.000	0.000	0.000
33	6	3	GTP binding protein overexpressed in skeletal muscle; transcript variant 2	P000343	5816	38014	400	15678	15695	1658	12080	12012	769	98	90	0	0	0	0	0	0	0	0	0	0	0	0	0	0	0	0	0	0	0	0	0	0	0	0	0	0	0	0	0.000	0.000	0.000	0.000	0.000	0.000
33	1	4	TNF receptor-associated factor 4; transcript variant 1	P000446	2829	38768	400	15678	15107	1153	12594	12775	1297	80	62	0	0	0	0	0	0	0	0	0	0	0	0	0	0	0	0	0	0	0	0	0	0	0	0	0	0	0	0	0.000	0.000	0.000	0.000	0.000	0.000
33	2	4	TNF receptor-associated factor 4; transcript variant 1	P000446	3426	38768	400	15420	15221	1489	12594	12509	840	87	67	0	0	0	0	0	0	0	0	0	0	0	0	0	0	0	0	0	0	0	0	0	0	0	0	0	0	0	0	0.000	0.000	0.000	0.000	0.000	0.000
33	3	4	TNF receptor-associated factor 4; transcript variant 1	P000446	4024	38768	400	15934	15746	1763	12594	12532	1265	85	64	0	0	0	0	0	0	0	0	0	0	0	0	0	0	0	0	0	0	0	0	0	0	0	0	0	0	0	0	0.000	0.000	0.000	0.000	0.000	0.000
33	4	4	TNF receptor-associated factor 4; transcript variant 1	P000446	4621	38768	400	15420	15204	1386	12080	12079	638	93	88	0	0	0	0	0	0	0	0	0	0	0	0	0	0	0	0	0	0	0	0	0	0	0	0	0	0	0	0	0.000	0.000	0.000	0.000	0.000	0.000
33	5	4	protein tyrosine phosphatase; non-receptor type 1	P000556	5219	38768	400	17476	18607	5409	11822	12165	1773	87	68	0	0	0	0	0	0	0	0	0	0	0	0	0	0	0	0	0	0	0	0	0	0	0	0	0	0	0	0	0.000	0.000	0.000	0.000	0.000	0.000
33	6	4	protein tyrosine phosphatase; non-receptor type 1	P000556	5816	38768	400	15164	14885	1134	12080	13021	3352	38	0	0	0	0	0	0	0	0	0	0	0	0	0	0	0	0	0	0	0	0	0	0	0	0	0	0	0	0	0	0.000	0.000	0.000	0.000	0.000	0.000
33	1	5	protein tyrosine phosphatase; non-receptor type 1	P000556	2829	39521	400	16706	16148	2157	13108	13463	1816	75	45	0	0	0	0	0	0	0	0	0	0	0	0	0	0	0	0	0	0	0	0	0	0	0	0	0	0	0	0	0.000	0.000	0.000	0.000	0.000	0.000
33	2	5	protein tyrosine phosphatase; non-receptor type 1	P000556	3426	39521	400	16448	15820	1854	12594	12557	548	84	81	0	0	0	0	0	0	0	0	0	0	0	0	0	0	0	0	0	0	0	0	0	0	0	0	0	0	0	0	0.000	0.000	0.000	0.000	0.000	0.000
33	3	5	Buffer	n/a	4024	39521	400	12336	12748	1804	12336	12316	1076	16	9	0	0	0	0	0	0	0	0	0	0	0	0	0	0	0	0	0	0	0	0	0	0	0	0	0	0	0	0	0.000	0.000	0.000	0.000	0.000	0.000
33	4	5	Buffer	n/a	4621	39521	400	11822	12018	1036	11822	12060	1096	18	5	0	0	0	0	0	0	0	0	0	0	0	0	0	0	0	0	0	0	0	0	0	0	0	0	0	0	0	0	0.000	0.000	0.000	0.000	0.000	0.000
33	5	5	Buffer	n/a	5219	39521	400	12336	12371	421	11822	11808	652	41	0	0	0	0	0	0	0	0	0	0	0	0	0	0	0	0	0	0	0	0	0	0	0	0	0	0	0	0	0	0.000	0.000	0.000	0.000	0.000	0.000
33	6	5	Buffer	n/a	5816	39521	400	11822	12166	1385	12080	12178	1460	10	6	0	0	0	0	0	0	0	0	0	0	0	0	0	0	0	0	0	0	0	0	0	0	0	0	0	0	0	0	0.000	0.000	0.000	0.000	0.000	0.000
34	1	1	BSA3	n/a	6414	36507	400	11566	11560	780	11822	11811	665	7	4	0	0	0	0	0	0	0	0	0	0	0	0	0	0	0	0	0	0	0	0	0	0	0	0	0	0	0	0	0.000	0.000	0.000	0.000	0.000	0.000
34	2	1	BSA3	n/a	7011	36507	400	11308	11381	813	11822	11854	594	11	6	0	0	0	0	0	0	0	0	0	0	0	0	0	0	0	0	0	0	0	0	0	0	0	0	0	0	0	0	0.000	0.000	0.000	0.000	0.000	0.000
34	3	1	empty	empty	7609	36507	400	10794	10861	835	11308	11442	637	10	5	0	0	0	0	0	0	0	0	0	0	0	0	0	0	0	0	0	0	0	0	0	0	0	0	0	0	0	0	0.000	0.000	0.000	0.000	0.000	0.000
34	4	1	empty	empty	8206	36507	400	11052	11060	865	10794	11044	1116	16	1	0	0	0	0	0	0	0	0	0	0	0	0	0	0	0	0	0	0	0	0	0	0	0	0	0	0	0	0	0.000	0.000	0.000	0.000	0.000	0.000
34	5	1	empty	empty	8804	36507	400	11308	11442	717	11822	12101	1847	0	0	0	0	0	0	0	0	0	0	0	0	0	0	0	0	0	0	0	0	0	0	0	0	0	0	0	0	0	0	0.000	0.000	0.000	0.000	0.000	0.000
34	6	1	empty	empty	9401	36507	400	11308	11707	1826	11308	11300	893	13	8	0	0	0	0	0	0	0	0	0	0	0	0	0	0	0	0	0	0	0	0	0	0	0	0	0	0	0	0	0.000	0.000	0.000	0.000	0.000	0.000
34	1	2	protein kinase D3	P000035	6414	37261	400	14392	14497	1206	11308	11349	708	99	94	0	0	0	0	0	0	0	0	0	0	0	0	0	0	0	0	0	0	0	0	0	0	0	0	0	0	0	0	0.000	0.000	0.000	0.000	0.000	0.000
34	2	2	protein kinase D3	P000035	7011	37261	400	13622	13459	1327	11566	11522	952	76	54	0	0	0	0	0	0	0	0	0	0	0	0	0	0	0	0	0	0	0	0	0	0	0	0	0	0	0	0	0.000	0.000	0.000	0.000	0.000	0.000
34	3	2	protein kinase D3	P000035	7609	37261	400	12336	12405	870	11566	11559	779	47	17	0	0	0	0	0	0	0	0	0	0	0	0	0	0	0	0	0	0	0	0	0	0	0	0	0	0	0	0	0.000	0.000	0.000	0.000	0.000	0.000
34	4	2	protein kinase D3	P000035	8206	37261	400	12850	12797	1052	11052	11049	894	77	54	0	0	0	0	0	0	0	0	0	0	0	0	0	0	0	0	0	0	0	0	0	0	0	0	0	0	0	0	0.000	0.000	0.000	0.000	0.000	0.000
34	5	2	chimerin (chimaerin) 1	P000146	8804	37261	400	14650	14507	1839	11566	11671	1087	79	69	0	0	0	0	0	0	0	0	0	0	0	0	0	0	0	0	0	0	0	0	0	0	0	0	0	0	0	0	0.000	0.000	0.000	0.000	0.000	0.000
34	6	2	chimerin (chimaerin) 1	P000146	9401	37261	400	14136	13736	1563	11052	11278	889	85	76	0	0	0	0	0	0	0	0	0	0	0	0	0	0	0	0	0	0	0	0	0	0	0	0	0	0	0	0	0.000	0.000	0.000	0.000	0.000	0.000
34	1	3	chimerin (chimaerin) 1	P000146	6414	38014	400	16192	15599	1523	11308	11524	796	97	92	0	0	0	0	0	0	0	0	0	0	0	0	0	0	0	0	0	0	0	0	0	0	0	0	0	0	0	0	0.000	0.000	0.000	0.000	0.000	0.000
34	2	3	chimerin (chimaerin) 1	P000146	7011	38014	400	15164	14805	1656	11566	11703	1074	84	75	0	0	0	0	0	0	0	0	0	0	0	0	0	0	0	0	0	0	0	0	0	0	0	0	0	0	0	0	0.000	0.000	0.000	0.000	0.000	0.000
34	3	3	related RAS viral (r-ras) oncogene homolog 2	P000326	7609	38014	400	12850	12944	1810	11566	11648	1430	45	18	0	0	0	0	0	0	0	0	0	0	0	0	0	0	0	0	0	0	0	0	0	0	0	0	0	0	0	0	0.000	0.000	0.000	0.000	0.000	0.000
34	4	3	related RAS viral (r-ras) oncogene homolog 2	P000326	8206	38014	400	12594	12485	1280	11308	11419	778	59	43	0	0	0	0	0	0	0	0	0	0	0	0	0	0	0	0	0	0	0	0	0	0	0	0	0	0	0	0	0.000	0.000	0.000	0.000	0.000	0.000
34	5	3	related RAS viral (r-ras) oncogene homolog 2	P000326	8804	38014	400	12080	12123	1127	11052	11255	801	56	30	0	0	0	0	0	0	0	0	0	0	0	0	0	0	0	0	0	0	0	0	0	0	0	0	0	0	0	0	0.000	0.000	0.000	0.000	0.000	0.000
34	6	3	related RAS viral (r-ras) oncogene homolog 2	P000326	9401	38014	400	13364	13684	2052	10794	11008	1329	74	47	0	0	0	0	0	0	0	0	0	0	0	0	0	0	0	0	0	0	0	0	0	0	0	0	0	0	0	0	0.000	0.000	0.000	0.000	0.000	0.000
34	1	4	sterile alpha motif and leucine zipper containing kinase AZK	P000425	6414	38768	400	13622	13571	2061	11822	11912	912	63	49	0	0	0	0	0	0	0	0	0	0	0	0	0	0	0	0	0	0	0	0	0	0	0	0	0	0	0	0	0.000	0.000	0.000	0.000	0.000	0.000
34	2	4	sterile alpha motif and leucine zipper containing kinase AZK	P000425	7011	38768	400	13364	13237	1447	11822	11802	787	64	47	0	0	0	0	0	0	0	0	0	0	0	0	0	0	0	0	0	0	0	0	0	0	0	0	0	0	0	0	0.000	0.000	0.000	0.000	0.000	0.000
34	3	4	sterile alpha motif and leucine zipper containing kinase AZK	P000425	7609	38768	400	13622	13859	1488	11566	11685	1248	76	41	0	0	0	0	0	0	0	0	0	0	0	0	0	0	0	0	0	0	0	0	0	0	0	0	0	0	0	0	0.000	0.000	0.000	0.000	0.000	0.000
34	4	4	sterile alpha motif and leucine zipper containing kinase AZK	P000425	8206	38768	400	13364	13095	1413	11566	12097	2474	29	1	0	0	0	0	0	0	0	0	0	0	0	0	0	0	0	0	0	0	0	0	0	0	0	0	0	0	0	0	0.000	0.000	0.000	0.000	0.000	0.000
34	5	4	guanine nucleotide binding protein (G protein); gamma 3	P000529	8804	38768	400	12336	12879	2103	11566	11665	978	40	21	0	0	0	0	0	0	0	0	0	0	0	0	0	0	0	0	0	0	0	0	0	0	0	0	0	0	0	0	0.000	0.000	0.000	0.000	0.000	0.000
34	6	4	guanine nucleotide binding protein (G protein); gamma 3	P000529	9401	38768	400	12336	12300	1354	11052	11210	1203	52	20	0	0	0	0	0	0	0	0	0	0	0	0	0	0	0	0	0	0	0	0	0	0	0	0	0	0	0	0	0.000	0.000	0.000	0.000	0.000	0.000
34	1	5	guanine nucleotide binding protein (G protein); gamma 3	P000529	6414	39521	400	12594	12701	1165	12336	12384	834	28	13	0	0	0	0	0	0	0	0	0	0	0	0	0	0	0	0	0	0	0	0	0	0	0	0	0	0	0	0	0.000	0.000	0.000	0.000	0.000	0.000
34	2	5	guanine nucleotide binding protein (G protein); gamma 3	P000529	7011	39521	400	12336	12419	737	11822	12015	1260	22	1	0	0	0	0	0	0	0	0	0	0	0	0	0	0	0	0	0	0	0	0	0	0	0	0	0	0	0	0	0.000	0.000	0.000	0.000	0.000	0.000
34	3	5	Buffer	n/a	7609	39521	400	12080	12491	1454	11308	11321	622	60	42	0	0	0	0	0	0	0	0	0	0	0	0	0	0	0	0	0	0	0	0	0	0	0	0	0	0	0	0	0.000	0.000	0.000	0.000	0.000	0.000
34	4	5	Buffer	n/a	8206	39521	400	12080	12462	1639	11308	11224	821	47	33	0	0	0	0	0	0	0	0	0	0	0	0	0	0	0	0	0	0	0	0	0	0	0	0	0	0	0	0	0.000	0.000	0.000	0.000	0.000	0.000
34	5	5	Buffer	n/a	8804	39521	400	10794	10878	694	11052	11134	742	14	2	0	0	0	0	0	0	0	0	0	0	0	0	0	0	0	0	0	0	0	0	0	0	0	0	0	0	0	0	0.000	0.000	0.000	0.000	0.000	0.000
34	6	5	Buffer	n/a	9401	39521	400	10794	11303	1804	11052	11022	738	22	13	0	0	0	0	0	0	0	0	0	0	0	0	0	0	0	0	0	0	0	0	0	0	0	0	0	0	0	0	0.000	0.000	0.000	0.000	0.000	0.000
35	1	1	Nonphosphopeptide3	empty	10072	36432	400	12080	11954	688	11308	14260	8469	0	0	0	0	0	0	0	0	0	0	0	0	0	0	0	0	0	0	0	0	0	0	0	0	0	0	0	0	0	0	0.000	0.000	0.000	0.000	0.000	0.000
35	2	1	Nonphosphopeptide3	empty	10669	36432	400	10794	10858	694	10538	12752	6751	0	0	0	0	0	0	0	0	0	0	0	0	0	0	0	0	0	0	0	0	0	0	0	0	0	0	0	0	0	0	0.000	0.000	0.000	0.000	0.000	0.000
35	3	1	empty	empty	11267	36432	400	10794	10943	1025	10538	10644	747	30	13	0	0	0	0	0	0	0	0	0	0	0	0	0	0	0	0	0	0	0	0	0	0	0	0	0	0	0	0	0.000	0.000	0.000	0.000	0.000	0.000
35	4	1	empty	empty	11864	36432	400	10794	11006	892	10794	10879	1021	17	6	0	0	0	0	0	0	0	0	0	0	0	0	0	0	0	0	0	0	0	0	0	0	0	0	0	0	0	0	0.000	0.000	0.000	0.000	0.000	0.000
35	5	1	empty	empty	12462	36432	400	10794	10963	741	11052	11391	1497	4	0	0	0	0	0	0	0	0	0	0	0	0	0	0	0	0	0	0	0	0	0	0	0	0	0	0	0	0	0	0.000	0.000	0.000	0.000	0.000	0.000
35	6	1	empty	empty	13059	36432	400	10794	11363	1804	11052	11119	1395	17	11	0	0	0	0	0	0	0	0	0	0	0	0	0	0	0	0	0	0	0	0	0	0	0	0	0	0	0	0	0.000	0.000	0.000	0.000	0.000	0.000
35	1	2	pyruvate dehydrogenase kinase; isoenzyme 1	P000018	10072	37186	400	12336	12453	950	10666	11231	2476	19	0	0	0	0	0	0	0	0	0	0	0	0	0	0	0	0	0	0	0	0	0	0	0	0	0	0	0	0	0	0.000	0.000	0.000	0.000	0.000	0.000
35	2	2	pyruvate dehydrogenase kinase; isoenzyme 1	P000018	10669	37186	400	12336	15529	7399	10538	10991	1960	45	31	0	0	0	0	0	0	0	0	0	0	0	0	0	0	0	0	0	0	0	0	0	0	0	0	0	0	0	0	0.000	0.000	0.000	0.000	0.000	0.000
35	3	2	pyruvate dehydrogenase kinase; isoenzyme 1	P000018	11267	37186	400	12080	12908	2755	10280	10278	777	85	57	0	0	0	0	0	0	0	0	0	0	0	0	0	0	0	0	0	0	0	0	0	0	0	0	0	0	0	0	0.000	0.000	0.000	0.000	0.000	0.000
35	4	2	pyruvate dehydrogenase kinase; isoenzyme 1	P000018	11864	37186	400	11822	11742	620	11052	11057	853	43	0	0	0	0	0	0	0	0	0	0	0	0	0	0	0	0	0	0	0	0	0	0	0	0	0	0	0	0	0	0.000	0.000	0.000	0.000	0.000	0.000
35	5	2	nuclear receptor coactivator 4	P000101	12462	37186	400	11822	11989	1609	10538	11458	2821	12	4	0	0	0	0	0	0	0	0	0	0	0	0	0	0	0	0	0	0	0	0	0	0	0	0	0	0	0	0	0.000	0.000	0.000	0.000	0.000	0.000
35	6	2	nuclear receptor coactivator 4	P000101	13059	37186	400	13493	13780	1860	10794	10687	894	87	72	0	0	0	0	0	0	0	0	0	0	0	0	0	0	0	0	0	0	0	0	0	0	0	0	0	0	0	0	0.000	0.000	0.000	0.000	0.000	0.000
35	1	3	nuclear receptor coactivator 4	P000101	10072	37939	400	13108	13266	1093	10794	10769	861	93	75	0	0	0	0	0	0	0	0	0	0	0	0	0	0	0	0	0	0	0	0	0	0	0	0	0	0	0	0	0.000	0.000	0.000	0.000	0.000	0.000
35	2	3	nuclear receptor coactivator 4	P000101	10669	37939	400	12080	13730	5278	11052	10947	944	53	23	0	0	0	0	0	0	0	0	0	0	0	0	0	0	0	0	0	0	0	0	0	0	0	0	0	0	0	0	0.000	0.000	0.000	0.000	0.000	0.000
35	3	3	MADS box transcription enhancer factor 2; polypeptide A	P000306	11267	37939	400	14650	14803	2693	10280	10546	864	95	85	0	0	0	0	0	0	0	0	0	0	0	0	0	0	0	0	0	0	0	0	0	0	0	0	0	0	0	0	0.000	0.000	0.000	0.000	0.000	0.000
35	4	3	MADS box transcription enhancer factor 2; polypeptide A	P000306	11864	37939	400	13622	14023	1568	10538	10605	1122	98	85	0	0	0	0	0	0	0	0	0	0	0	0	0	0	0	0	0	0	0	0	0	0	0	0	0	0	0	0	0.000	0.000	0.000	0.000	0.000	0.000
35	5	3	MADS box transcription enhancer factor 2; polypeptide A	P000306	12462	37939	400	15420	15960	2486	10794	11137	1208	100	91	0	0	0	0	0	0	0	0	0	0	0	0	0	0	0	0	0	0	0	0	0	0	0	0	0	0	0	0	0.000	0.000	0.000	0.000	0.000	0.000
35	6	3	MADS box transcription enhancer factor 2; polypeptide A	P000306	13059	37939	400	16192	19010	6667	11052	11278	1689	98	64	0	0	0	0	0	0	0	0	0	0	0	0	0	0	0	0	0	0	0	0	0	0	0	0	0	0	0	0	0.000	0.000	0.000	0.000	0.000	0.000
35	1	4	transducin (beta)-like 1X-linked	P000400	10072	38693	400	11308	11679	1139	10280	10578	1762	34	7	0	0	0	0	0	0	0	0	0	0	0	0	0	0	0	0	0	0	0	0	0	0	0	0	0	0	0	0	0.000	0.000	0.000	0.000	0.000	0.000
35	2	4	transducin (beta)-like 1X-linked	P000400	10669	38693	400	12850	13481	2371	10794	10903	2052	56	20	0	0	0	0	0	0	0	0	0	0	0	0	0	0	0	0	0	0	0	0	0	0	0	0	0	0	0	0	0.000	0.000	0.000	0.000	0.000	0.000
35	3	4	transducin (beta)-like 1X-linked	P000400	11267	38693	400	12594	13419	2196	10666	10697	745	85	65	0	0	0	0	0	0	0	0	0	0	0	0	0	0	0	0	0	0	0	0	0	0	0	0	0	0	0	0	0.000	0.000	0.000	0.000	0.000	0.000
35	4	4	transducin (beta)-like 1X-linked	P000400	11864	38693	400	12080	12051	867	10794	11025	1042	61	12	0	0	0	0	0	0	0	0	0	0	0	0	0	0	0	0	0	0	0	0	0	0	0	0	0	0	0	0	0.000	0.000	0.000	0.000	0.000	0.000
35	5	4	activating transcription factor 3	P000502	12462	38693	400	13108	13911	2657	10794	11251	1210	81	50	0	0	0	0	0	0	0	0	0	0	0	0	0	0	0	0	0	0	0	0	0	0	0	0	0	0	0	0	0.000	0.000	0.000	0.000	0.000	0.000
35	6	4	activating transcription factor 3	P000502	13059	38693	400	13878	13924	903	10538	10575	624	100	99	0	0	0	0	0	0	0	0	0	0	0	0	0	0	0	0	0	0	0	0	0	0	0	0	0	0	0	0	0.000	0.000	0.000	0.000	0.000	0.000
35	1	5	activating transcription factor 3	P000502	10072	39446	400	13108	12869	804	10794	11226	1723	72	6	0	0	0	0	0	0	0	0	0	0	0	0	0	0	0	0	0	0	0	0	0	0	0	0	0	0	0	0	0.000	0.000	0.000	0.000	0.000	0.000
35	2	5	activating transcription factor 3	P000502	10669	39446	400	13108	13643	1778	11308	12181	2562	38	12	0	0	0	0	0	0	0	0	0	0	0	0	0	0	0	0	0	0	0	0	0	0	0	0	0	0	0	0	0.000	0.000	0.000	0.000	0.000	0.000
35	3	5	serine/threonine kinase 38 like	P000989	11267	39446	400	12465	12853	1497	10280	10348	608	94	83	0	0	0	0	0	0	0	0	0	0	0	0	0	0	0	0	0	0	0	0	0	0	0	0	0	0	0	0	0.000	0.000	0.000	0.000	0.000	0.000
35	4	5	serine/threonine kinase 38 like	P000989	11864	39446	400	12336	14828	5756	11052	11125	845	57	45	0	0	0	0	0	0	0	0	0	0	0	0	0	0	0	0	0	0	0	0	0	0	0	0	0	0	0	0	0.000	0.000	0.000	0.000	0.000	0.000
35	5	5	serine/threonine kinase 38 like	P000989	12462	39446	400	13108	13410	1479	10794	11062	933	95	61	0	0	0	0	0	0	0	0	0	0	0	0	0	0	0	0	0	0	0	0	0	0	0	0	0	0	0	0	0.000	0.000	0.000	0.000	0.000	0.000
35	6	5	serine/threonine kinase 38 like	P000989	13059	39446	400	12850	12630	1018	10794	11204	1683	60	0	0	0	0	0	0	0	0	0	0	0	0	0	0	0	0	0	0	0	0	0	0	0	0	0	0	0	0	0	0.000	0.000	0.000	0.000	0.000	0.000
36	1	1	Cy5/Cy3 labeled biotin-BSA marker proteins	n/a	13681	36457	400	10794	10681	699	11052	11175	933	3	0	0	0	0	0	0	0	0	0	0	0	0	0	0	0	0	0	0	0	0	0	0	0	0	0	0	0	0	0	0.000	0.000	0.000	0.000	0.000	0.000
36	2	1	Cy5/Cy3 labeled biotin-BSA marker proteins	n/a	14278	36457	400	10794	11046	1056	11566	11489	1157	8	3	0	0	0	0	0	0	0	0	0	0	0	0	0	0	0	0	0	0	0	0	0	0	0	0	0	0	0	0	0.000	0.000	0.000	0.000	0.000	0.000
36	3	1	empty	empty	14876	36457	400	10280	10186	966	11052	12026	3151	0	0	0	0	0	0	0	0	0	0	0	0	0	0	0	0	0	0	0	0	0	0	0	0	0	0	0	0	0	0	0.000	0.000	0.000	0.000	0.000	0.000
36	4	1	empty	empty	15473	36457	400	9766	9720	560	10794	10700	601	0	0	0	0	0	0	0	0	0	0	0	0	0	0	0	0	0	0	0	0	0	0	0	0	0	0	0	0	0	0	0.000	0.000	0.000	0.000	0.000	0.000
36	5	1	empty	empty	16071	36457	400	9766	9764	530	10280	10090	793	0	0	0	0	0	0	0	0	0	0	0	0	0	0	0	0	0	0	0	0	0	0	0	0	0	0	0	0	0	0	0.000	0.000	0.000	0.000	0.000	0.000
36	6	1	empty	empty	16668	36457	400	10024	9970	524	9766	9688	836	7	0	0	0	0	0	0	0	0	0	0	0	0	0	0	0	0	0	0	0	0	0	0	0	0	0	0	0	0	0	0.000	0.000	0.000	0.000	0.000	0.000
36	1	2	Buffer	n/a	13681	37211	400	10538	10978	1684	10538	10807	828	24	18	0	0	0	0	0	0	0	0	0	0	0	0	0	0	0	0	0	0	0	0	0	0	0	0	0	0	0	0	0.000	0.000	0.000	0.000	0.000	0.000
36	2	2	Buffer	n/a	14278	37211	400	11052	11003	958	10794	10962	1174	18	1	0	0	0	0	0	0	0	0	0	0	0	0	0	0	0	0	0	0	0	0	0	0	0	0	0	0	0	0	0.000	0.000	0.000	0.000	0.000	0.000
36	3	2	Buffer	n/a	14876	37211	400	11052	11087	1119	11308	11044	959	13	5	0	0	0	0	0	0	0	0	0	0	0	0	0	0	0	0	0	0	0	0	0	0	0	0	0	0	0	0	0.000	0.000	0.000	0.000	0.000	0.000
36	4	2	Buffer	n/a	15473	37211	400	10024	10281	668	10794	10533	807	2	0	0	0	0	0	0	0	0	0	0	0	0	0	0	0	0	0	0	0	0	0	0	0	0	0	0	0	0	0	0.000	0.000	0.000	0.000	0.000	0.000
36	5	2	calcium/calmodulin-dependent protein kinase IV	P000082	16071	37211	400	11566	11492	895	10024	9924	714	83	53	0	0	0	0	0	0	0	0	0	0	0	0	0	0	0	0	0	0	0	0	0	0	0	0	0	0	0	0	0.000	0.000	0.000	0.000	0.000	0.000
36	6	2	calcium/calmodulin-dependent protein kinase IV	P000082	16668	37211	400	11308	11331	1048	9766	9707	704	78	57	0	0	0	0	0	0	0	0	0	0	0	0	0	0	0	0	0	0	0	0	0	0	0	0	0	0	0	0	0.000	0.000	0.000	0.000	0.000	0.000
36	1	3	calcium/calmodulin-dependent protein kinase IV	P000082	13681	37964	400	12850	12675	716	10280	10229	596	97	92	0	0	0	0	0	0	0	0	0	0	0	0	0	0	0	0	0	0	0	0	0	0	0	0	0	0	0	0	0.000	0.000	0.000	0.000	0.000	0.000
36	2	3	calcium/calmodulin-dependent protein kinase IV	P000082	14278	37964	400	13364	13758	2013	10538	10830	891	92	76	0	0	0	0	0	0	0	0	0	0	0	0	0	0	0	0	0	0	0	0	0	0	0	0	0	0	0	0	0.000	0.000	0.000	0.000	0.000	0.000
36	3	3	baculoviral IAP repeat-containing 3	P000285	14876	37964	400	13364	13359	1009	11308	11269	818	87	70	0	0	0	0	0	0	0	0	0	0	0	0	0	0	0	0	0	0	0	0	0	0	0	0	0	0	0	0	0.000	0.000	0.000	0.000	0.000	0.000
36	4	3	baculoviral IAP repeat-containing 3	P000285	15473	37964	400	11822	11980	681	10538	10444	743	88	49	0	0	0	0	0	0	0	0	0	0	0	0	0	0	0	0	0	0	0	0	0	0	0	0	0	0	0	0	0.000	0.000	0.000	0.000	0.000	0.000
36	5	3	baculoviral IAP repeat-containing 3	P000285	16071	37964	400	11566	11497	1031	10024	10114	675	78	51	0	0	0	0	0	0	0	0	0	0	0	0	0	0	0	0	0	0	0	0	0	0	0	0	0	0	0	0	0.000	0.000	0.000	0.000	0.000	0.000
36	6	3	baculoviral IAP repeat-containing 3	P000285	16668	37964	400	11566	11842	2473	10024	10038	623	71	61	0	0	0	0	0	0	0	0	0	0	0	0	0	0	0	0	0	0	0	0	0	0	0	0	0	0	0	0	0.000	0.000	0.000	0.000	0.000	0.000
36	1	4	guanine nucleotide binding protein (G protein); alpha inhibiting activity polypeptide 2	P000367	13681	38718	400	12850	14135	4024	10538	10611	548	68	61	0	0	0	0	0	0	0	0	0	0	0	0	0	0	0	0	0	0	0	0	0	0	0	0	0	0	0	0	0.000	0.000	0.000	0.000	0.000	0.000
36	2	4	guanine nucleotide binding protein (G protein); alpha inhibiting activity polypeptide 2	P000367	14278	38718	400	12336	12390	877	10538	10787	1129	77	37	0	0	0	0	0	0	0	0	0	0	0	0	0	0	0	0	0	0	0	0	0	0	0	0	0	0	0	0	0.000	0.000	0.000	0.000	0.000	0.000
36	3	4	guanine nucleotide binding protein (G protein); alpha inhibiting activity polypeptide 2	P000367	14876	38718	400	12594	12666	703	11052	10967	858	86	48	0	0	0	0	0	0	0	0	0	0	0	0	0	0	0	0	0	0	0	0	0	0	0	0	0	0	0	0	0.000	0.000	0.000	0.000	0.000	0.000
36	4	4	guanine nucleotide binding protein (G protein); alpha inhibiting activity polypeptide 2	P000367	15473	38718	400	11822	11898	1069	10794	10611	867	58	30	0	0	0	0	0	0	0	0	0	0	0	0	0	0	0	0	0	0	0	0	0	0	0	0	0	0	0	0	0.000	0.000	0.000	0.000	0.000	0.000
36	5	4	down-regulator of transcription 1; TBP-binding (negative cofactor 2)	P000477	16071	38718	400	11822	11876	836	10538	10472	675	83	46	0	0	0	0	0	0	0	0	0	0	0	0	0	0	0	0	0	0	0	0	0	0	0	0	0	0	0	0	0.000	0.000	0.000	0.000	0.000	0.000
36	6	4	down-regulator of transcription 1; TBP-binding (negative cofactor 2)	P000477	16668	38718	400	11308	11231	1038	10024	10267	1495	40	6	0	0	0	0	0	0	0	0	0	0	0	0	0	0	0	0	0	0	0	0	0	0	0	0	0	0	0	0	0.000	0.000	0.000	0.000	0.000	0.000
36	1	5	down-regulator of transcription 1; TBP-binding (negative cofactor 2)	P000477	13681	39471	400	13108	13017	1383	10538	10700	642	91	81	0	0	0	0	0	0	0	0	0	0	0	0	0	0	0	0	0	0	0	0	0	0	0	0	0	0	0	0	0.000	0.000	0.000	0.000	0.000	0.000
36	2	5	down-regulator of transcription 1; TBP-binding (negative cofactor 2)	P000477	14278	39471	400	14392	14679	2719	10794	10718	675	89	78	0	0	0	0	0	0	0	0	0	0	0	0	0	0	0	0	0	0	0	0	0	0	0	0	0	0	0	0	0.000	0.000	0.000	0.000	0.000	0.000
36	3	5	TRAP/Mediator complex component	P000588	14876	39471	400	11308	12144	2083	11308	11360	662	41	35	0	0	0	0	0	0	0	0	0	0	0	0	0	0	0	0	0	0	0	0	0	0	0	0	0	0	0	0	0.000	0.000	0.000	0.000	0.000	0.000
36	4	5	TRAP/Mediator complex component	P000588	15473	39471	400	11308	14305	6337	10538	10655	767	58	40	0	0	0	0	0	0	0	0	0	0	0	0	0	0	0	0	0	0	0	0	0	0	0	0	0	0	0	0	0.000	0.000	0.000	0.000	0.000	0.000
36	5	5	TRAP/Mediator complex component	P000588	16071	39471	400	11566	11509	1306	10024	10567	1228	60	24	0	0	0	0	0	0	0	0	0	0	0	0	0	0	0	0	0	0	0	0	0	0	0	0	0	0	0	0	0.000	0.000	0.000	0.000	0.000	0.000
36	6	5	TRAP/Mediator complex component	P000588	16668	39471	400	11566	11600	1151	10280	10172	804	59	36	0	0	0	0	0	0	0	0	0	0	0	0	0	0	0	0	0	0	0	0	0	0	0	0	0	0	0	0	0.000	0.000	0.000	0.000	0.000	0.000
37	1	1	Cy5/Cy3 labeled biotin-BSA marker proteins	n/a	2854	40066	400	12850	12817	713	12336	12382	757	44	11	0	0	0	0	0	0	0	0	0	0	0	0	0	0	0	0	0	0	0	0	0	0	0	0	0	0	0	0	0.000	0.000	0.000	0.000	0.000	0.000
37	2	1	Cy5/Cy3 labeled biotin-BSA marker proteins	n/a	3451	40066	400	13108	14621	3871	12336	12350	649	51	36	0	0	0	0	0	0	0	0	0	0	0	0	0	0	0	0	0	0	0	0	0	0	0	0	0	0	0	0	0.000	0.000	0.000	0.000	0.000	0.000
37	3	1	empty	empty	4049	40066	400	13108	13047	900	12336	12618	1665	15	0	0	0	0	0	0	0	0	0	0	0	0	0	0	0	0	0	0	0	0	0	0	0	0	0	0	0	0	0	0.000	0.000	0.000	0.000	0.000	0.000
37	4	1	empty	empty	4646	40066	400	11822	12027	606	12080	12305	1668	0	0	0	0	0	0	0	0	0	0	0	0	0	0	0	0	0	0	0	0	0	0	0	0	0	0	0	0	0	0	0.000	0.000	0.000	0.000	0.000	0.000
37	5	1	empty	empty	5244	40066	400	11822	11706	415	12080	12159	674	0	0	0	0	0	0	0	0	0	0	0	0	0	0	0	0	0	0	0	0	0	0	0	0	0	0	0	0	0	0	0.000	0.000	0.000	0.000	0.000	0.000
37	6	1	empty	empty	5841	40066	400	11566	11580	767	12080	12275	1517	1	0	0	0	0	0	0	0	0	0	0	0	0	0	0	0	0	0	0	0	0	0	0	0	0	0	0	0	0	0	0.000	0.000	0.000	0.000	0.000	0.000
37	1	2	glycogen synthase kinase 3 beta	P000058	2854	40820	400	16448	16145	1266	13108	13347	1147	89	74	0	0	0	0	0	0	0	0	0	0	0	0	0	0	0	0	0	0	0	0	0	0	0	0	0	0	0	0	0.000	0.000	0.000	0.000	0.000	0.000
37	2	2	glycogen synthase kinase 3 beta	P000058	3451	40820	400	15934	15936	872	12594	12613	1045	99	90	0	0	0	0	0	0	0	0	0	0	0	0	0	0	0	0	0	0	0	0	0	0	0	0	0	0	0	0	0.000	0.000	0.000	0.000	0.000	0.000
37	3	2	glycogen synthase kinase 3 beta	P000058	4049	40820	400	15934	15612	1025	12080	12134	812	97	93	0	0	0	0	0	0	0	0	0	0	0	0	0	0	0	0	0	0	0	0	0	0	0	0	0	0	0	0	0.000	0.000	0.000	0.000	0.000	0.000
37	4	2	glycogen synthase kinase 3 beta	P000058	4646	40820	400	15678	15414	1009	11822	11853	675	100	97	0	0	0	0	0	0	0	0	0	0	0	0	0	0	0	0	0	0	0	0	0	0	0	0	0	0	0	0	0.000	0.000	0.000	0.000	0.000	0.000
37	5	2	B lymphoid tyrosine kinase	P000229	5244	40820	400	14906	15046	1477	11822	11877	643	99	93	0	0	0	0	0	0	0	0	0	0	0	0	0	0	0	0	0	0	0	0	0	0	0	0	0	0	0	0	0.000	0.000	0.000	0.000	0.000	0.000
37	6	2	B lymphoid tyrosine kinase	P000229	5841	40820	400	15164	14922	1235	11822	11818	787	97	84	0	0	0	0	0	0	0	0	0	0	0	0	0	0	0	0	0	0	0	0	0	0	0	0	0	0	0	0	0.000	0.000	0.000	0.000	0.000	0.000
37	1	3	B lymphoid tyrosine kinase	P000229	2854	41573	400	16192	16259	1639	12594	12679	487	100	97	0	0	0	0	0	0	0	0	0	0	0	0	0	0	0	0	0	0	0	0	0	0	0	0	0	0	0	0	0.000	0.000	0.000	0.000	0.000	0.000
37	2	3	B lymphoid tyrosine kinase	P000229	3451	41573	400	16192	16087	1404	12594	12748	540	98	94	0	0	0	0	0	0	0	0	0	0	0	0	0	0	0	0	0	0	0	0	0	0	0	0	0	0	0	0	0.000	0.000	0.000	0.000	0.000	0.000
37	3	3	baculoviral IAP repeat-containing 2	P000344	4049	41573	400	14136	14300	810	12336	12306	598	95	85	0	0	0	0	0	0	0	0	0	0	0	0	0	0	0	0	0	0	0	0	0	0	0	0	0	0	0	0	0.000	0.000	0.000	0.000	0.000	0.000
37	4	3	baculoviral IAP repeat-containing 2	P000344	4646	41573	400	14392	14493	1515	12594	12816	1100	68	32	0	0	0	0	0	0	0	0	0	0	0	0	0	0	0	0	0	0	0	0	0	0	0	0	0	0	0	0	0.000	0.000	0.000	0.000	0.000	0.000
37	5	3	baculoviral IAP repeat-containing 2	P000344	5244	41573	400	14906	15614	2568	11822	11960	912	94	73	0	0	0	0	0	0	0	0	0	0	0	0	0	0	0	0	0	0	0	0	0	0	0	0	0	0	0	0	0.000	0.000	0.000	0.000	0.000	0.000
37	6	3	baculoviral IAP repeat-containing 2	P000344	5841	41573	400	14136	15493	4086	12080	12261	877	70	58	0	0	0	0	0	0	0	0	0	0	0	0	0	0	0	0	0	0	0	0	0	0	0	0	0	0	0	0	0.000	0.000	0.000	0.000	0.000	0.000
37	1	4	cyclin-dependent kinase inhibitor 1A (p21; Cip1); transcript variant 1	P000447	2854	42327	400	15164	15367	1306	12850	12756	839	92	71	0	0	0	0	0	0	0	0	0	0	0	0	0	0	0	0	0	0	0	0	0	0	0	0	0	0	0	0	0.000	0.000	0.000	0.000	0.000	0.000
37	2	4	cyclin-dependent kinase inhibitor 1A (p21; Cip1); transcript variant 1	P000447	3451	42327	400	15420	15701	1785	12850	12666	753	96	81	0	0	0	0	0	0	0	0	0	0	0	0	0	0	0	0	0	0	0	0	0	0	0	0	0	0	0	0	0.000	0.000	0.000	0.000	0.000	0.000
37	3	4	cyclin-dependent kinase inhibitor 1A (p21; Cip1); transcript variant 1	P000447	4049	42327	400	14136	14420	1076	12850	12706	743	84	46	0	0	0	0	0	0	0	0	0	0	0	0	0	0	0	0	0	0	0	0	0	0	0	0	0	0	0	0	0.000	0.000	0.000	0.000	0.000	0.000
37	4	4	cyclin-dependent kinase inhibitor 1A (p21; Cip1); transcript variant 1	P000447	4646	42327	400	14650	15054	1813	12336	12294	574	93	81	0	0	0	0	0	0	0	0	0	0	0	0	0	0	0	0	0	0	0	0	0	0	0	0	0	0	0	0	0.000	0.000	0.000	0.000	0.000	0.000
37	5	4	nuclear receptor subfamily 3; group C; member 1 (glucocorticoid receptor)	P000557	5244	42327	400	16192	18284	6237	12336	11907	949	71	62	0	0	0	0	0	0	0	0	0	0	0	0	0	0	0	0	0	0	0	0	0	0	0	0	0	0	0	0	0.000	0.000	0.000	0.000	0.000	0.000
37	6	4	nuclear receptor subfamily 3; group C; member 1 (glucocorticoid receptor)	P000557	5841	42327	400	12594	12729	946	12080	12162	955	37	12	0	0	0	0	0	0	0	0	0	0	0	0	0	0	0	0	0	0	0	0	0	0	0	0	0	0	0	0	0.000	0.000	0.000	0.000	0.000	0.000
37	1	5	nuclear receptor subfamily 3; group C; member 1 (glucocorticoid receptor)	P000557	2854	43080	400	14906	14956	1213	13108	13399	1267	74	23	0	0	0	0	0	0	0	0	0	0	0	0	0	0	0	0	0	0	0	0	0	0	0	0	0	0	0	0	0.000	0.000	0.000	0.000	0.000	0.000
37	2	5	nuclear receptor subfamily 3; group C; member 1 (glucocorticoid receptor)	P000557	3451	43080	400	14650	14566	929	13108	13111	1109	65	23	0	0	0	0	0	0	0	0	0	0	0	0	0	0	0	0	0	0	0	0	0	0	0	0	0	0	0	0	0.000	0.000	0.000	0.000	0.000	0.000
37	3	5	Buffer	n/a	4049	43080	400	13108	12834	986	12850	12905	808	16	0	0	0	0	0	0	0	0	0	0	0	0	0	0	0	0	0	0	0	0	0	0	0	0	0	0	0	0	0	0.000	0.000	0.000	0.000	0.000	0.000
37	4	5	Buffer	n/a	4646	43080	400	13108	13326	758	12594	12554	786	38	12	0	0	0	0	0	0	0	0	0	0	0	0	0	0	0	0	0	0	0	0	0	0	0	0	0	0	0	0	0.000	0.000	0.000	0.000	0.000	0.000
37	5	5	Buffer	n/a	5244	43080	400	12080	12106	592	12336	12222	600	3	0	0	0	0	0	0	0	0	0	0	0	0	0	0	0	0	0	0	0	0	0	0	0	0	0	0	0	0	0	0.000	0.000	0.000	0.000	0.000	0.000
37	6	5	Buffer	n/a	5841	43080	400	11822	11735	700	12080	12134	934	5	0	0	0	0	0	0	0	0	0	0	0	0	0	0	0	0	0	0	0	0	0	0	0	0	0	0	0	0	0	0.000	0.000	0.000	0.000	0.000	0.000
38	1	1	BSA4	n/a	6438	40067	400	12336	12925	2294	11566	11799	1525	35	17	0	0	0	0	0	0	0	0	0	0	0	0	0	0	0	0	0	0	0	0	0	0	0	0	0	0	0	0	0.000	0.000	0.000	0.000	0.000	0.000
38	2	1	BSA4	n/a	7035	40067	400	11566	11521	468	11566	11578	1105	0	0	0	0	0	0	0	0	0	0	0	0	0	0	0	0	0	0	0	0	0	0	0	0	0	0	0	0	0	0	0.000	0.000	0.000	0.000	0.000	0.000
38	3	1	empty	empty	7633	40067	400	11822	11709	1400	11566	11786	1117	17	9	0	0	0	0	0	0	0	0	0	0	0	0	0	0	0	0	0	0	0	0	0	0	0	0	0	0	0	0	0.000	0.000	0.000	0.000	0.000	0.000
38	4	1	empty	empty	8230	40067	400	12080	12387	2132	11052	11213	804	53	36	0	0	0	0	0	0	0	0	0	0	0	0	0	0	0	0	0	0	0	0	0	0	0	0	0	0	0	0	0.000	0.000	0.000	0.000	0.000	0.000
38	5	1	empty	empty	8828	40067	400	10794	10935	1045	11052	10953	679	24	9	0	0	0	0	0	0	0	0	0	0	0	0	0	0	0	0	0	0	0	0	0	0	0	0	0	0	0	0	0.000	0.000	0.000	0.000	0.000	0.000
38	6	1	empty	empty	9425	40067	400	11308	11198	1173	11052	11129	1556	2	1	0	0	0	0	0	0	0	0	0	0	0	0	0	0	0	0	0	0	0	0	0	0	0	0	0	0	0	0	0.000	0.000	0.000	0.000	0.000	0.000
38	1	2	mitogen-activated protein kinase 9; transcript variant 1	P000038	6438	40821	400	12594	12627	735	11822	12114	1491	18	0	0	0	0	0	0	0	0	0	0	0	0	0	0	0	0	0	0	0	0	0	0	0	0	0	0	0	0	0	0.000	0.000	0.000	0.000	0.000	0.000
38	2	2	mitogen-activated protein kinase 9; transcript variant 1	P000038	7035	40821	400	12850	13086	899	11822	11789	1314	38	8	0	0	0	0	0	0	0	0	0	0	0	0	0	0	0	0	0	0	0	0	0	0	0	0	0	0	0	0	0.000	0.000	0.000	0.000	0.000	0.000
38	3	2	mitogen-activated protein kinase 9; transcript variant 1	P000038	7633	40821	400	13364	13476	894	12080	13215	4929	0	0	0	0	0	0	0	0	0	0	0	0	0	0	0	0	0	0	0	0	0	0	0	0	0	0	0	0	0	0	0.000	0.000	0.000	0.000	0.000	0.000
38	4	2	mitogen-activated protein kinase 9; transcript variant 1	P000038	8230	40821	400	13108	13172	946	11308	11441	725	91	75	0	0	0	0	0	0	0	0	0	0	0	0	0	0	0	0	0	0	0	0	0	0	0	0	0	0	0	0	0.000	0.000	0.000	0.000	0.000	0.000
38	5	2	salvador homolog 1 (Drosophila)	P000147	8828	40821	400	12594	13147	1619	11308	11315	961	63	38	0	0	0	0	0	0	0	0	0	0	0	0	0	0	0	0	0	0	0	0	0	0	0	0	0	0	0	0	0.000	0.000	0.000	0.000	0.000	0.000
38	6	2	salvador homolog 1 (Drosophila)	P000147	9425	40821	400	12080	13962	4186	10538	10627	1116	70	38	0	0	0	0	0	0	0	0	0	0	0	0	0	0	0	0	0	0	0	0	0	0	0	0	0	0	0	0	0.000	0.000	0.000	0.000	0.000	0.000
38	1	3	salvador homolog 1 (Drosophila)	P000147	6438	41574	400	13108	13187	600	12080	12296	1152	48	0	0	0	0	0	0	0	0	0	0	0	0	0	0	0	0	0	0	0	0	0	0	0	0	0	0	0	0	0	0.000	0.000	0.000	0.000	0.000	0.000
38	2	3	salvador homolog 1 (Drosophila)	P000147	7035	41574	400	13108	13508	1272	12080	11912	719	73	39	0	0	0	0	0	0	0	0	0	0	0	0	0	0	0	0	0	0	0	0	0	0	0	0	0	0	0	0	0.000	0.000	0.000	0.000	0.000	0.000
38	3	3	caspase 3; apoptosis-related cysteine protease; transcript variant alpha	P000327	7633	41574	400	14136	15382	4872	11822	14292	8597	6	3	0	0	0	0	0	0	0	0	0	0	0	0	0	0	0	0	0	0	0	0	0	0	0	0	0	0	0	0	0.000	0.000	0.000	0.000	0.000	0.000
38	4	3	caspase 3; apoptosis-related cysteine protease; transcript variant alpha	P000327	8230	41574	400	13108	12941	1000	11566	11544	1133	66	21	0	0	0	0	0	0	0	0	0	0	0	0	0	0	0	0	0	0	0	0	0	0	0	0	0	0	0	0	0.000	0.000	0.000	0.000	0.000	0.000
38	5	3	caspase 3; apoptosis-related cysteine protease; transcript variant alpha	P000327	8828	41574	400	12594	13858	3279	11308	11750	1394	43	30	0	0	0	0	0	0	0	0	0	0	0	0	0	0	0	0	0	0	0	0	0	0	0	0	0	0	0	0	0.000	0.000	0.000	0.000	0.000	0.000
38	6	3	caspase 3; apoptosis-related cysteine protease; transcript variant alpha	P000327	9425	41574	400	12080	12556	2036	11052	11092	749	59	40	0	0	0	0	0	0	0	0	0	0	0	0	0	0	0	0	0	0	0	0	0	0	0	0	0	0	0	0	0.000	0.000	0.000	0.000	0.000	0.000
38	1	4	ras homolog gene family; member A	P000426	6438	42328	400	13622	13768	1485	12080	11964	913	79	28	0	0	0	0	0	0	0	0	0	0	0	0	0	0	0	0	0	0	0	0	0	0	0	0	0	0	0	0	0.000	0.000	0.000	0.000	0.000	0.000
38	2	4	ras homolog gene family; member A	P000426	7035	42328	400	13108	13331	1315	11822	11871	845	67	40	0	0	0	0	0	0	0	0	0	0	0	0	0	0	0	0	0	0	0	0	0	0	0	0	0	0	0	0	0.000	0.000	0.000	0.000	0.000	0.000
38	3	4	ras homolog gene family; member A	P000426	7633	42328	400	13878	14120	1631	11566	11721	814	89	66	0	0	0	0	0	0	0	0	0	0	0	0	0	0	0	0	0	0	0	0	0	0	0	0	0	0	0	0	0.000	0.000	0.000	0.000	0.000	0.000
38	4	4	ras homolog gene family; member A	P000426	8230	42328	400	13364	13379	1199	11308	11262	827	81	61	0	0	0	0	0	0	0	0	0	0	0	0	0	0	0	0	0	0	0	0	0	0	0	0	0	0	0	0	0.000	0.000	0.000	0.000	0.000	0.000
38	5	4	hemoglobin; gamma A	P000531	8828	42328	400	12850	13044	1624	11308	11166	791	69	45	0	0	0	0	0	0	0	0	0	0	0	0	0	0	0	0	0	0	0	0	0	0	0	0	0	0	0	0	0.000	0.000	0.000	0.000	0.000	0.000
38	6	4	hemoglobin; gamma A	P000531	9425	42328	400	14136	14727	2890	10794	10973	856	89	71	0	0	0	0	0	0	0	0	0	0	0	0	0	0	0	0	0	0	0	0	0	0	0	0	0	0	0	0	0.000	0.000	0.000	0.000	0.000	0.000
38	1	5	hemoglobin; gamma A	P000531	6438	43081	400	13364	13593	1880	12080	12198	1397	45	19	0	0	0	0	0	0	0	0	0	0	0	0	0	0	0	0	0	0	0	0	0	0	0	0	0	0	0	0	0.000	0.000	0.000	0.000	0.000	0.000
38	2	5	hemoglobin; gamma A	P000531	7035	43081	400	11822	11931	742	11308	11228	735	47	13	0	0	0	0	0	0	0	0	0	0	0	0	0	0	0	0	0	0	0	0	0	0	0	0	0	0	0	0	0.000	0.000	0.000	0.000	0.000	0.000
38	3	5	Buffer	n/a	7633	43081	400	11566	11509	602	11566	11568	684	13	0	0	0	0	0	0	0	0	0	0	0	0	0	0	0	0	0	0	0	0	0	0	0	0	0	0	0	0	0	0.000	0.000	0.000	0.000	0.000	0.000
38	4	5	Buffer	n/a	8230	43081	400	11052	12045	2278	11052	11170	1160	34	20	0	0	0	0	0	0	0	0	0	0	0	0	0	0	0	0	0	0	0	0	0	0	0	0	0	0	0	0	0.000	0.000	0.000	0.000	0.000	0.000
38	5	5	Buffer	n/a	8828	43081	400	11052	10999	601	11566	11583	899	0	0	0	0	0	0	0	0	0	0	0	0	0	0	0	0	0	0	0	0	0	0	0	0	0	0	0	0	0	0	0.000	0.000	0.000	0.000	0.000	0.000
38	6	5	Buffer	n/a	9425	43081	400	10538	10573	616	11052	11185	1059	0	0	0	0	0	0	0	0	0	0	0	0	0	0	0	0	0	0	0	0	0	0	0	0	0	0	0	0	0	0	0.000	0.000	0.000	0.000	0.000	0.000
39	1	1	Nonphosphopeptide4	empty	10121	40041	400	10794	10819	604	10538	11249	2110	0	0	0	0	0	0	0	0	0	0	0	0	0	0	0	0	0	0	0	0	0	0	0	0	0	0	0	0	0	0	0.000	0.000	0.000	0.000	0.000	0.000
39	2	1	Nonphosphopeptide4	empty	10718	40041	400	11308	11221	824	10794	11234	1839	3	0	0	0	0	0	0	0	0	0	0	0	0	0	0	0	0	0	0	0	0	0	0	0	0	0	0	0	0	0	0.000	0.000	0.000	0.000	0.000	0.000
39	3	1	empty	empty	11316	40041	400	10024	9893	1344	10794	10647	810	9	3	0	0	0	0	0	0	0	0	0	0	0	0	0	0	0	0	0	0	0	0	0	0	0	0	0	0	0	0	0.000	0.000	0.000	0.000	0.000	0.000
39	4	1	empty	empty	11913	40041	400	10794	12038	3379	10794	10938	1095	20	16	0	0	0	0	0	0	0	0	0	0	0	0	0	0	0	0	0	0	0	0	0	0	0	0	0	0	0	0	0.000	0.000	0.000	0.000	0.000	0.000
39	5	1	empty	empty	12511	40041	400	10794	11103	1076	10794	11036	1365	12	6	0	0	0	0	0	0	0	0	0	0	0	0	0	0	0	0	0	0	0	0	0	0	0	0	0	0	0	0	0.000	0.000	0.000	0.000	0.000	0.000
39	6	1	empty	empty	13108	40041	400	11052	11160	636	10280	10461	821	45	9	0	0	0	0	0	0	0	0	0	0	0	0	0	0	0	0	0	0	0	0	0	0	0	0	0	0	0	0	0.000	0.000	0.000	0.000	0.000	0.000
39	1	2	protein kinase C; eta	P000020	10121	40795	400	13622	13932	2009	10538	10796	1392	86	61	0	0	0	0	0	0	0	0	0	0	0	0	0	0	0	0	0	0	0	0	0	0	0	0	0	0	0	0	0.000	0.000	0.000	0.000	0.000	0.000
39	2	2	protein kinase C; eta	P000020	10718	40795	400	12850	12952	785	10538	10646	656	98	93	0	0	0	0	0	0	0	0	0	0	0	0	0	0	0	0	0	0	0	0	0	0	0	0	0	0	0	0	0.000	0.000	0.000	0.000	0.000	0.000
39	3	2	protein kinase C; eta	P000020	11316	40795	400	12594	12743	1059	10538	10523	758	94	80	0	0	0	0	0	0	0	0	0	0	0	0	0	0	0	0	0	0	0	0	0	0	0	0	0	0	0	0	0.000	0.000	0.000	0.000	0.000	0.000
39	4	2	protein kinase C; eta	P000020	11913	40795	400	12850	13049	1084	10280	10379	1085	96	64	0	0	0	0	0	0	0	0	0	0	0	0	0	0	0	0	0	0	0	0	0	0	0	0	0	0	0	0	0.000	0.000	0.000	0.000	0.000	0.000
39	5	2	heat shock 90kDa protein 1; alpha	P000102	12511	40795	400	17220	17625	2722	10538	10563	904	100	100	0	0	0	0	0	0	0	0	0	0	0	0	0	0	0	0	0	0	0	0	0	0	0	0	0	0	0	0	0.000	0.000	0.000	0.000	0.000	0.000
39	6	2	heat shock 90kDa protein 1; alpha	P000102	13108	40795	400	16192	16406	1871	10538	10783	1035	100	100	0	0	0	0	0	0	0	0	0	0	0	0	0	0	0	0	0	0	0	0	0	0	0	0	0	0	0	0	0.000	0.000	0.000	0.000	0.000	0.000
39	1	3	heat shock 90kDa protein 1; alpha	P000102	10121	41548	400	17476	18708	2756	11308	11358	988	100	100	0	0	0	0	0	0	0	0	0	0	0	0	0	0	0	0	0	0	0	0	0	0	0	0	0	0	0	0	0.000	0.000	0.000	0.000	0.000	0.000
39	2	3	heat shock 90kDa protein 1; alpha	P000102	10718	41548	400	17990	17845	2001	11052	11031	853	100	100	0	0	0	0	0	0	0	0	0	0	0	0	0	0	0	0	0	0	0	0	0	0	0	0	0	0	0	0	0.000	0.000	0.000	0.000	0.000	0.000
39	3	3	myeloid differentiation primary response gene (88)	P000307	11316	41548	400	11566	11456	853	10794	10807	926	46	3	0	0	0	0	0	0	0	0	0	0	0	0	0	0	0	0	0	0	0	0	0	0	0	0	0	0	0	0	0.000	0.000	0.000	0.000	0.000	0.000
39	4	3	myeloid differentiation primary response gene (88)	P000307	11913	41548	400	12336	12218	903	10538	10766	1041	73	31	0	0	0	0	0	0	0	0	0	0	0	0	0	0	0	0	0	0	0	0	0	0	0	0	0	0	0	0	0.000	0.000	0.000	0.000	0.000	0.000
39	5	3	myeloid differentiation primary response gene (88)	P000307	12511	41548	400	12336	12498	1263	10538	10446	810	79	55	0	0	0	0	0	0	0	0	0	0	0	0	0	0	0	0	0	0	0	0	0	0	0	0	0	0	0	0	0.000	0.000	0.000	0.000	0.000	0.000
39	6	3	myeloid differentiation primary response gene (88)	P000307	13108	41548	400	12594	14851	5481	10280	10403	778	78	64	0	0	0	0	0	0	0	0	0	0	0	0	0	0	0	0	0	0	0	0	0	0	0	0	0	0	0	0	0.000	0.000	0.000	0.000	0.000	0.000
39	1	4	glutamate-cysteine ligase; catalytic subunit	P000406	10121	42302	400	11822	11889	793	10794	11100	996	54	17	0	0	0	0	0	0	0	0	0	0	0	0	0	0	0	0	0	0	0	0	0	0	0	0	0	0	0	0	0.000	0.000	0.000	0.000	0.000	0.000
39	2	4	glutamate-cysteine ligase; catalytic subunit	P000406	10718	42302	400	12336	12361	987	10538	10539	740	87	66	0	0	0	0	0	0	0	0	0	0	0	0	0	0	0	0	0	0	0	0	0	0	0	0	0	0	0	0	0.000	0.000	0.000	0.000	0.000	0.000
39	3	4	glutamate-cysteine ligase; catalytic subunit	P000406	11316	42302	400	12336	12529	1564	10280	10334	855	79	56	0	0	0	0	0	0	0	0	0	0	0	0	0	0	0	0	0	0	0	0	0	0	0	0	0	0	0	0	0.000	0.000	0.000	0.000	0.000	0.000
39	4	4	glutamate-cysteine ligase; catalytic subunit	P000406	11913	42302	400	12080	12029	1234	10538	11041	3089	6	0	0	0	0	0	0	0	0	0	0	0	0	0	0	0	0	0	0	0	0	0	0	0	0	0	0	0	0	0	0.000	0.000	0.000	0.000	0.000	0.000
39	5	4	NCK adaptor protein 1	P000503	12511	42302	400	11822	11839	1230	10538	11917	5712	0	0	0	0	0	0	0	0	0	0	0	0	0	0	0	0	0	0	0	0	0	0	0	0	0	0	0	0	0	0	0.000	0.000	0.000	0.000	0.000	0.000
39	6	4	NCK adaptor protein 1	P000503	13108	42302	400	11308	12262	1999	10538	10630	1156	44	27	0	0	0	0	0	0	0	0	0	0	0	0	0	0	0	0	0	0	0	0	0	0	0	0	0	0	0	0	0.000	0.000	0.000	0.000	0.000	0.000
39	1	5	NCK adaptor protein 1	P000503	10121	43055	400	12080	12692	1980	10923	11182	1482	25	12	0	0	0	0	0	0	0	0	0	0	0	0	0	0	0	0	0	0	0	0	0	0	0	0	0	0	0	0	0.000	0.000	0.000	0.000	0.000	0.000
39	2	5	NCK adaptor protein 1	P000503	10718	43055	400	11566	11591	593	10538	10430	661	71	27	0	0	0	0	0	0	0	0	0	0	0	0	0	0	0	0	0	0	0	0	0	0	0	0	0	0	0	0	0.000	0.000	0.000	0.000	0.000	0.000
39	3	5	fyn-related kinase	P001004	11316	43055	400	11052	10931	747	10280	10522	1215	33	0	0	0	0	0	0	0	0	0	0	0	0	0	0	0	0	0	0	0	0	0	0	0	0	0	0	0	0	0	0.000	0.000	0.000	0.000	0.000	0.000
39	4	5	fyn-related kinase	P001004	11913	43055	400	11822	11717	721	10409	11891	7036	0	0	0	0	0	0	0	0	0	0	0	0	0	0	0	0	0	0	0	0	0	0	0	0	0	0	0	0	0	0	0.000	0.000	0.000	0.000	0.000	0.000
39	5	5	fyn-related kinase	P001004	12511	43055	400	10538	10885	1501	10280	14376	12034	0	0	0	0	0	0	0	0	0	0	0	0	0	0	0	0	0	0	0	0	0	0	0	0	0	0	0	0	0	0	0.000	0.000	0.000	0.000	0.000	0.000
39	6	5	fyn-related kinase	P001004	13108	43055	400	11308	11654	1158	11052	11459	1892	12	2	0	0	0	0	0	0	0	0	0	0	0	0	0	0	0	0	0	0	0	0	0	0	0	0	0	0	0	0	0.000	0.000	0.000	0.000	0.000	0.000
40	1	1	Cy5/Cy3 labeled biotin-BSA marker proteins	n/a	13706	40042	400	11052	11153	515	10538	10649	679	43	6	0	0	0	0	0	0	0	0	0	0	0	0	0	0	0	0	0	0	0	0	0	0	0	0	0	0	0	0	0.000	0.000	0.000	0.000	0.000	0.000
40	2	1	Cy5/Cy3 labeled biotin-BSA marker proteins	n/a	14303	40042	400	10794	10836	515	10794	10746	542	7	3	0	0	0	0	0	0	0	0	0	0	0	0	0	0	0	0	0	0	0	0	0	0	0	0	0	0	0	0	0.000	0.000	0.000	0.000	0.000	0.000
40	3	1	empty	empty	14901	40042	400	10794	11102	1163	11052	10958	632	26	11	0	0	0	0	0	0	0	0	0	0	0	0	0	0	0	0	0	0	0	0	0	0	0	0	0	0	0	0	0.000	0.000	0.000	0.000	0.000	0.000
40	4	1	empty	empty	15498	40042	400	10794	10904	994	11052	11228	988	16	0	0	0	0	0	0	0	0	0	0	0	0	0	0	0	0	0	0	0	0	0	0	0	0	0	0	0	0	0	0.000	0.000	0.000	0.000	0.000	0.000
40	5	1	empty	empty	16096	40042	400	10024	10222	889	10024	10167	647	26	8	0	0	0	0	0	0	0	0	0	0	0	0	0	0	0	0	0	0	0	0	0	0	0	0	0	0	0	0	0.000	0.000	0.000	0.000	0.000	0.000
40	6	1	empty	empty	16693	40042	400	10538	10732	1118	10280	10280	644	31	17	0	0	0	0	0	0	0	0	0	0	0	0	0	0	0	0	0	0	0	0	0	0	0	0	0	0	0	0	0.000	0.000	0.000	0.000	0.000	0.000
40	1	2	Buffer	n/a	13706	40796	400	10538	10445	543	11052	11303	1017	0	0	0	0	0	0	0	0	0	0	0	0	0	0	0	0	0	0	0	0	0	0	0	0	0	0	0	0	0	0	0.000	0.000	0.000	0.000	0.000	0.000
40	2	2	Buffer	n/a	14303	40796	400	10794	10851	566	10794	10779	553	16	3	0	0	0	0	0	0	0	0	0	0	0	0	0	0	0	0	0	0	0	0	0	0	0	0	0	0	0	0	0.000	0.000	0.000	0.000	0.000	0.000
40	3	2	Buffer	n/a	14901	40796	400	10794	10816	609	10538	10700	775	14	4	0	0	0	0	0	0	0	0	0	0	0	0	0	0	0	0	0	0	0	0	0	0	0	0	0	0	0	0	0.000	0.000	0.000	0.000	0.000	0.000
40	4	2	Buffer	n/a	15498	40796	400	10794	10972	978	11308	13729	6552	0	0	0	0	0	0	0	0	0	0	0	0	0	0	0	0	0	0	0	0	0	0	0	0	0	0	0	0	0	0	0.000	0.000	0.000	0.000	0.000	0.000
40	5	2	mitogen-activated protein kinase 7; transcript variant 4	P000083	16096	40796	400	13364	13200	1244	10794	10809	2241	57	6	0	0	0	0	0	0	0	0	0	0	0	0	0	0	0	0	0	0	0	0	0	0	0	0	0	0	0	0	0.000	0.000	0.000	0.000	0.000	0.000
40	6	2	mitogen-activated protein kinase 7; transcript variant 4	P000083	16693	40796	400	14136	15035	2979	10280	10368	798	98	92	0	0	0	0	0	0	0	0	0	0	0	0	0	0	0	0	0	0	0	0	0	0	0	0	0	0	0	0	0.000	0.000	0.000	0.000	0.000	0.000
40	1	3	mitogen-activated protein kinase 7; transcript variant 4	P000083	13706	41549	400	13364	13445	1074	10538	10737	1211	98	64	0	0	0	0	0	0	0	0	0	0	0	0	0	0	0	0	0	0	0	0	0	0	0	0	0	0	0	0	0.000	0.000	0.000	0.000	0.000	0.000
40	2	3	mitogen-activated protein kinase 7; transcript variant 4	P000083	14303	41549	400	12594	12683	1294	10538	10696	672	88	71	0	0	0	0	0	0	0	0	0	0	0	0	0	0	0	0	0	0	0	0	0	0	0	0	0	0	0	0	0.000	0.000	0.000	0.000	0.000	0.000
40	3	3	calmodulin 2 (phosphorylase kinase; delta)	P000289	14901	41549	400	12080	12149	1039	10794	10759	644	75	44	0	0	0	0	0	0	0	0	0	0	0	0	0	0	0	0	0	0	0	0	0	0	0	0	0	0	0	0	0.000	0.000	0.000	0.000	0.000	0.000
40	4	3	calmodulin 2 (phosphorylase kinase; delta)	P000289	15498	41549	400	12080	12274	1124	11437	11867	2673	7	0	0	0	0	0	0	0	0	0	0	0	0	0	0	0	0	0	0	0	0	0	0	0	0	0	0	0	0	0	0.000	0.000	0.000	0.000	0.000	0.000
40	5	3	calmodulin 2 (phosphorylase kinase; delta)	P000289	16096	41549	400	11822	11960	998	11822	12847	3087	1	0	0	0	0	0	0	0	0	0	0	0	0	0	0	0	0	0	0	0	0	0	0	0	0	0	0	0	0	0	0.000	0.000	0.000	0.000	0.000	0.000
40	6	3	calmodulin 2 (phosphorylase kinase; delta)	P000289	16693	41549	400	12594	12544	847	10794	11080	2021	47	0	0	0	0	0	0	0	0	0	0	0	0	0	0	0	0	0	0	0	0	0	0	0	0	0	0	0	0	0	0.000	0.000	0.000	0.000	0.000	0.000
40	1	4	protein phosphatase 2 (formerly 2A); regulatory subunit B (PR 52); beta isoform	P000373	13706	42303	400	11052	10911	930	10794	10890	1024	22	0	0	0	0	0	0	0	0	0	0	0	0	0	0	0	0	0	0	0	0	0	0	0	0	0	0	0	0	0	0.000	0.000	0.000	0.000	0.000	0.000
40	2	4	protein phosphatase 2 (formerly 2A); regulatory subunit B (PR 52); beta isoform	P000373	14303	42303	400	12594	12585	788	11308	11290	1040	58	13	0	0	0	0	0	0	0	0	0	0	0	0	0	0	0	0	0	0	0	0	0	0	0	0	0	0	0	0	0.000	0.000	0.000	0.000	0.000	0.000
40	3	4	protein phosphatase 2 (formerly 2A); regulatory subunit B (PR 52); beta isoform	P000373	14901	42303	400	11822	11911	801	11308	12178	2953	0	0	0	0	0	0	0	0	0	0	0	0	0	0	0	0	0	0	0	0	0	0	0	0	0	0	0	0	0	0	0.000	0.000	0.000	0.000	0.000	0.000
40	4	4	protein phosphatase 2 (formerly 2A); regulatory subunit B (PR 52); beta isoform	P000373	15498	42303	400	11822	12130	1684	10794	11184	1510	44	14	0	0	0	0	0	0	0	0	0	0	0	0	0	0	0	0	0	0	0	0	0	0	0	0	0	0	0	0	0.000	0.000	0.000	0.000	0.000	0.000
40	5	4	ras-related C3 botulinum toxin substrate 1 (rho family; small GTP binding protein Rac1)	P000478	16096	42303	400	13878	13576	1259	10538	11249	1981	80	25	0	0	0	0	0	0	0	0	0	0	0	0	0	0	0	0	0	0	0	0	0	0	0	0	0	0	0	0	0.000	0.000	0.000	0.000	0.000	0.000
40	6	4	ras-related C3 botulinum toxin substrate 1 (rho family; small GTP binding protein Rac1)	P000478	16693	42303	400	14650	14687	2298	10538	10836	1496	88	68	0	0	0	0	0	0	0	0	0	0	0	0	0	0	0	0	0	0	0	0	0	0	0	0	0	0	0	0	0.000	0.000	0.000	0.000	0.000	0.000
40	1	5	ras-related C3 botulinum toxin substrate 1 (rho family; small GTP binding protein Rac1)	P000478	13706	43056	400	13878	14023	1409	11052	11259	1106	92	72	0	0	0	0	0	0	0	0	0	0	0	0	0	0	0	0	0	0	0	0	0	0	0	0	0	0	0	0	0.000	0.000	0.000	0.000	0.000	0.000
40	2	5	ras-related C3 botulinum toxin substrate 1 (rho family; small GTP binding protein Rac1)	P000478	14303	43056	400	13878	14030	1594	10794	10910	924	96	76	0	0	0	0	0	0	0	0	0	0	0	0	0	0	0	0	0	0	0	0	0	0	0	0	0	0	0	0	0.000	0.000	0.000	0.000	0.000	0.000
40	3	5	calsenilin; presenilin binding protein; EF hand transcription factor	P000593	14901	43056	400	12594	12659	1223	11566	11600	2037	22	1	0	0	0	0	0	0	0	0	0	0	0	0	0	0	0	0	0	0	0	0	0	0	0	0	0	0	0	0	0.000	0.000	0.000	0.000	0.000	0.000
40	4	5	calsenilin; presenilin binding protein; EF hand transcription factor	P000593	15498	43056	400	12594	12604	812	10794	10812	622	90	82	0	0	0	0	0	0	0	0	0	0	0	0	0	0	0	0	0	0	0	0	0	0	0	0	0	0	0	0	0.000	0.000	0.000	0.000	0.000	0.000
40	5	5	calsenilin; presenilin binding protein; EF hand transcription factor	P000593	16096	43056	400	12850	12815	1185	10794	11600	2860	22	0	0	0	0	0	0	0	0	0	0	0	0	0	0	0	0	0	0	0	0	0	0	0	0	0	0	0	0	0	0.000	0.000	0.000	0.000	0.000	0.000
40	6	5	calsenilin; presenilin binding protein; EF hand transcription factor	P000593	16693	43056	400	12850	14704	4101	11308	12849	3859	33	14	0	0	0	0	0	0	0	0	0	0	0	0	0	0	0	0	0	0	0	0	0	0	0	0	0	0	0	0	0.000	0.000	0.000	0.000	0.000	0.000
41	1	1	Cy5/Cy3 labeled biotin-BSA marker proteins	n/a	2804	43675	400	12594	12608	630	13622	13680	1505	0	0	0	0	0	0	0	0	0	0	0	0	0	0	0	0	0	0	0	0	0	0	0	0	0	0	0	0	0	0	0.000	0.000	0.000	0.000	0.000	0.000
41	2	1	Cy5/Cy3 labeled biotin-BSA marker proteins	n/a	3401	43675	400	12594	12471	595	13364	13227	907	0	0	0	0	0	0	0	0	0	0	0	0	0	0	0	0	0	0	0	0	0	0	0	0	0	0	0	0	0	0	0.000	0.000	0.000	0.000	0.000	0.000
41	3	1	empty	empty	3999	43675	400	12850	12725	716	13364	13346	860	0	0	0	0	0	0	0	0	0	0	0	0	0	0	0	0	0	0	0	0	0	0	0	0	0	0	0	0	0	0	0.000	0.000	0.000	0.000	0.000	0.000
41	4	1	empty	empty	4596	43675	400	12336	12682	1287	12850	12773	854	14	8	0	0	0	0	0	0	0	0	0	0	0	0	0	0	0	0	0	0	0	0	0	0	0	0	0	0	0	0	0.000	0.000	0.000	0.000	0.000	0.000
41	5	1	empty	empty	5194	43675	400	12080	11949	500	12080	12885	2258	0	0	0	0	0	0	0	0	0	0	0	0	0	0	0	0	0	0	0	0	0	0	0	0	0	0	0	0	0	0	0.000	0.000	0.000	0.000	0.000	0.000
41	6	1	empty	empty	5791	43675	400	11566	11528	483	11566	11624	886	3	0	0	0	0	0	0	0	0	0	0	0	0	0	0	0	0	0	0	0	0	0	0	0	0	0	0	0	0	0	0.000	0.000	0.000	0.000	0.000	0.000
41	1	2	mitogen-activated protein kinase 14; transcript variant 2	P000060	2804	44429	400	15164	15401	2133	12336	12515	876	90	79	0	0	0	0	0	0	0	0	0	0	0	0	0	0	0	0	0	0	0	0	0	0	0	0	0	0	0	0	0.000	0.000	0.000	0.000	0.000	0.000
41	2	2	mitogen-activated protein kinase 14; transcript variant 2	P000060	3401	44429	400	15164	15183	1043	12594	12674	947	95	74	0	0	0	0	0	0	0	0	0	0	0	0	0	0	0	0	0	0	0	0	0	0	0	0	0	0	0	0	0.000	0.000	0.000	0.000	0.000	0.000
41	3	2	mitogen-activated protein kinase 14; transcript variant 2	P000060	3999	44429	400	14392	14221	820	13108	13127	701	75	38	0	0	0	0	0	0	0	0	0	0	0	0	0	0	0	0	0	0	0	0	0	0	0	0	0	0	0	0	0.000	0.000	0.000	0.000	0.000	0.000
41	4	2	mitogen-activated protein kinase 14; transcript variant 2	P000060	4596	44429	400	13878	14051	1306	12594	12728	923	62	31	0	0	0	0	0	0	0	0	0	0	0	0	0	0	0	0	0	0	0	0	0	0	0	0	0	0	0	0	0.000	0.000	0.000	0.000	0.000	0.000
41	5	2	signal transducer and activator of transcription 3 (acute-phase response fac	P000234	5194	44429	400	14906	14979	1120	12336	13188	2775	42	1	0	0	0	0	0	0	0	0	0	0	0	0	0	0	0	0	0	0	0	0	0	0	0	0	0	0	0	0	0.000	0.000	0.000	0.000	0.000	0.000
41	6	2	signal transducer and activator of transcription 3 (acute-phase response fac	P000234	5791	44429	400	16448	16456	2023	11566	11523	806	100	96	0	0	0	0	0	0	0	0	0	0	0	0	0	0	0	0	0	0	0	0	0	0	0	0	0	0	0	0	0.000	0.000	0.000	0.000	0.000	0.000
41	1	3	signal transducer and activator of transcription 3 (acute-phase response fac	P000234	2804	45182	400	17220	16868	2707	12594	13294	2493	88	32	0	0	0	0	0	0	0	0	0	0	0	0	0	0	0	0	0	0	0	0	0	0	0	0	0	0	0	0	0.000	0.000	0.000	0.000	0.000	0.000
41	2	3	signal transducer and activator of transcription 3 (acute-phase response fac	P000234	3401	45182	400	16192	16016	836	12080	12310	749	100	100	0	0	0	0	0	0	0	0	0	0	0	0	0	0	0	0	0	0	0	0	0	0	0	0	0	0	0	0	0.000	0.000	0.000	0.000	0.000	0.000
41	3	3	PTK2 protein tyrosine kinase 2	P000347	3999	45182	400	14392	14551	884	12850	13177	1340	61	13	0	0	0	0	0	0	0	0	0	0	0	0	0	0	0	0	0	0	0	0	0	0	0	0	0	0	0	0	0.000	0.000	0.000	0.000	0.000	0.000
41	4	3	PTK2 protein tyrosine kinase 2	P000347	4596	45182	400	14392	14113	787	12594	12408	741	84	62	0	0	0	0	0	0	0	0	0	0	0	0	0	0	0	0	0	0	0	0	0	0	0	0	0	0	0	0	0.000	0.000	0.000	0.000	0.000	0.000
41	5	3	PTK2 protein tyrosine kinase 2	P000347	5194	45182	400	13878	13810	1292	12336	12214	634	70	58	0	0	0	0	0	0	0	0	0	0	0	0	0	0	0	0	0	0	0	0	0	0	0	0	0	0	0	0	0.000	0.000	0.000	0.000	0.000	0.000
41	6	3	PTK2 protein tyrosine kinase 2	P000347	5791	45182	400	14392	15113	3177	11822	11680	944	84	60	0	0	0	0	0	0	0	0	0	0	0	0	0	0	0	0	0	0	0	0	0	0	0	0	0	0	0	0	0.000	0.000	0.000	0.000	0.000	0.000
41	1	4	toll interacting protein	P000448	2804	45936	400	15934	15837	889	12594	12842	1586	95	55	0	0	0	0	0	0	0	0	0	0	0	0	0	0	0	0	0	0	0	0	0	0	0	0	0	0	0	0	0.000	0.000	0.000	0.000	0.000	0.000
41	2	4	toll interacting protein	P000448	3401	45936	400	15934	15790	834	12850	13005	1196	98	70	0	0	0	0	0	0	0	0	0	0	0	0	0	0	0	0	0	0	0	0	0	0	0	0	0	0	0	0	0.000	0.000	0.000	0.000	0.000	0.000
41	3	4	toll interacting protein	P000448	3999	45936	400	15420	16220	2840	12594	12850	1073	86	65	0	0	0	0	0	0	0	0	0	0	0	0	0	0	0	0	0	0	0	0	0	0	0	0	0	0	0	0	0.000	0.000	0.000	0.000	0.000	0.000
41	4	4	toll interacting protein	P000448	4596	45936	400	15164	15509	1312	12850	12724	639	98	92	0	0	0	0	0	0	0	0	0	0	0	0	0	0	0	0	0	0	0	0	0	0	0	0	0	0	0	0	0.000	0.000	0.000	0.000	0.000	0.000
41	5	4	protein phosphatase 2; regulatory subunit B (B56); gamma isoform; transcript	P000558	5194	45936	400	13108	13284	853	12594	13970	3759	0	0	0	0	0	0	0	0	0	0	0	0	0	0	0	0	0	0	0	0	0	0	0	0	0	0	0	0	0	0	0.000	0.000	0.000	0.000	0.000	0.000
41	6	4	protein phosphatase 2; regulatory subunit B (B56); gamma isoform; transcript	P000558	5791	45936	400	12336	12662	909	12336	13000	1954	8	0	0	0	0	0	0	0	0	0	0	0	0	0	0	0	0	0	0	0	0	0	0	0	0	0	0	0	0	0	0.000	0.000	0.000	0.000	0.000	0.000
41	1	5	protein phosphatase 2; regulatory subunit B (B56); gamma isoform; transcript	P000558	2804	46689	400	13878	13821	600	12850	12977	1109	43	3	0	0	0	0	0	0	0	0	0	0	0	0	0	0	0	0	0	0	0	0	0	0	0	0	0	0	0	0	0.000	0.000	0.000	0.000	0.000	0.000
41	2	5	protein phosphatase 2; regulatory subunit B (B56); gamma isoform; transcript	P000558	3401	46689	400	13878	13914	679	13364	13769	1413	7	2	0	0	0	0	0	0	0	0	0	0	0	0	0	0	0	0	0	0	0	0	0	0	0	0	0	0	0	0	0.000	0.000	0.000	0.000	0.000	0.000
41	3	5	Buffer	n/a	3999	46689	400	12594	12597	775	13364	13364	961	4	0	0	0	0	0	0	0	0	0	0	0	0	0	0	0	0	0	0	0	0	0	0	0	0	0	0	0	0	0	0.000	0.000	0.000	0.000	0.000	0.000
41	4	5	Buffer	n/a	4596	46689	400	12594	12516	958	12850	12822	659	14	2	0	0	0	0	0	0	0	0	0	0	0	0	0	0	0	0	0	0	0	0	0	0	0	0	0	0	0	0	0.000	0.000	0.000	0.000	0.000	0.000
41	5	5	Buffer	n/a	5194	46689	400	11822	11852	540	12336	12891	2129	0	0	0	0	0	0	0	0	0	0	0	0	0	0	0	0	0	0	0	0	0	0	0	0	0	0	0	0	0	0	0.000	0.000	0.000	0.000	0.000	0.000
41	6	5	Buffer	n/a	5791	46689	400	11566	11556	523	11822	11871	609	3	0	0	0	0	0	0	0	0	0	0	0	0	0	0	0	0	0	0	0	0	0	0	0	0	0	0	0	0	0	0.000	0.000	0.000	0.000	0.000	0.000
42	1	1	BSA5	n/a	6438	43651	400	11822	11881	862	11822	12077	1323	7	0	0	0	0	0	0	0	0	0	0	0	0	0	0	0	0	0	0	0	0	0	0	0	0	0	0	0	0	0	0.000	0.000	0.000	0.000	0.000	0.000
42	2	1	BSA5	n/a	7035	43651	400	11052	11200	791	11308	11446	808	12	4	0	0	0	0	0	0	0	0	0	0	0	0	0	0	0	0	0	0	0	0	0	0	0	0	0	0	0	0	0.000	0.000	0.000	0.000	0.000	0.000
42	3	1	empty	empty	7633	43651	400	11308	11292	587	11308	11360	776	8	1	0	0	0	0	0	0	0	0	0	0	0	0	0	0	0	0	0	0	0	0	0	0	0	0	0	0	0	0	0.000	0.000	0.000	0.000	0.000	0.000
42	4	1	empty	empty	8230	43651	400	11308	11647	1114	11566	11770	1175	16	6	0	0	0	0	0	0	0	0	0	0	0	0	0	0	0	0	0	0	0	0	0	0	0	0	0	0	0	0	0.000	0.000	0.000	0.000	0.000	0.000
42	5	1	empty	empty	8828	43651	400	10794	11025	643	11308	11510	886	4	1	0	0	0	0	0	0	0	0	0	0	0	0	0	0	0	0	0	0	0	0	0	0	0	0	0	0	0	0	0.000	0.000	0.000	0.000	0.000	0.000
42	6	1	empty	empty	9425	43651	400	11308	11367	535	11308	11128	1000	7	0	0	0	0	0	0	0	0	0	0	0	0	0	0	0	0	0	0	0	0	0	0	0	0	0	0	0	0	0	0.000	0.000	0.000	0.000	0.000	0.000
42	1	2	tousled-like kinase 1	P000039	6438	44405	400	17734	18396	3430	11308	11408	419	100	100	0	0	0	0	0	0	0	0	0	0	0	0	0	0	0	0	0	0	0	0	0	0	0	0	0	0	0	0	0.000	0.000	0.000	0.000	0.000	0.000
42	2	2	tousled-like kinase 1	P000039	7035	44405	400	16448	17197	3217	11566	11438	693	100	96	0	0	0	0	0	0	0	0	0	0	0	0	0	0	0	0	0	0	0	0	0	0	0	0	0	0	0	0	0.000	0.000	0.000	0.000	0.000	0.000
42	3	2	tousled-like kinase 1	P000039	7633	44405	400	17734	18738	4836	10538	10628	1045	100	98	0	0	0	0	0	0	0	0	0	0	0	0	0	0	0	0	0	0	0	0	0	0	0	0	0	0	0	0	0.000	0.000	0.000	0.000	0.000	0.000
42	4	2	tousled-like kinase 1	P000039	8230	44405	400	15934	15840	1600	11308	13628	5602	22	0	0	0	0	0	0	0	0	0	0	0	0	0	0	0	0	0	0	0	0	0	0	0	0	0	0	0	0	0	0.000	0.000	0.000	0.000	0.000	0.000
42	5	2	tumor necrosis factor receptor superfamily; member 6; transcript variant 1	P000149	8828	44405	400	13108	13063	1135	11566	11654	1216	59	27	0	0	0	0	0	0	0	0	0	0	0	0	0	0	0	0	0	0	0	0	0	0	0	0	0	0	0	0	0.000	0.000	0.000	0.000	0.000	0.000
42	6	2	tumor necrosis factor receptor superfamily; member 6; transcript variant 1	P000149	9425	44405	400	12336	12425	992	10537	11151	1324	69	24	0	0	0	0	0	0	0	0	0	0	0	0	0	0	0	0	0	0	0	0	0	0	0	0	0	0	0	0	0.000	0.000	0.000	0.000	0.000	0.000
42	1	3	tumor necrosis factor receptor superfamily; member 6; transcript variant 1	P000149	6438	45158	400	13878	13907	1006	11052	11114	718	98	92	0	0	0	0	0	0	0	0	0	0	0	0	0	0	0	0	0	0	0	0	0	0	0	0	0	0	0	0	0.000	0.000	0.000	0.000	0.000	0.000
42	2	3	tumor necrosis factor receptor superfamily; member 6; transcript variant 1	P000149	7035	45158	400	13622	13724	1036	11308	11142	738	99	84	0	0	0	0	0	0	0	0	0	0	0	0	0	0	0	0	0	0	0	0	0	0	0	0	0	0	0	0	0.000	0.000	0.000	0.000	0.000	0.000
42	3	3	MAD; mothers against decapentaplegic homolog 2 (Drosophila)	P000328	7633	45158	400	12850	12865	1066	10538	10708	897	90	73	0	0	0	0	0	0	0	0	0	0	0	0	0	0	0	0	0	0	0	0	0	0	0	0	0	0	0	0	0.000	0.000	0.000	0.000	0.000	0.000
42	4	3	MAD; mothers against decapentaplegic homolog 2 (Drosophila)	P000328	8230	45158	400	13622	14177	2205	11052	11133	747	95	75	0	0	0	0	0	0	0	0	0	0	0	0	0	0	0	0	0	0	0	0	0	0	0	0	0	0	0	0	0.000	0.000	0.000	0.000	0.000	0.000
42	5	3	MAD; mothers against decapentaplegic homolog 2 (Drosophila)	P000328	8828	45158	400	13364	13730	1931	11052	11144	649	88	68	0	0	0	0	0	0	0	0	0	0	0	0	0	0	0	0	0	0	0	0	0	0	0	0	0	0	0	0	0.000	0.000	0.000	0.000	0.000	0.000
42	6	3	MAD; mothers against decapentaplegic homolog 2 (Drosophila)	P000328	9425	45158	400	12080	12006	659	11308	11639	1308	11	0	0	0	0	0	0	0	0	0	0	0	0	0	0	0	0	0	0	0	0	0	0	0	0	0	0	0	0	0	0.000	0.000	0.000	0.000	0.000	0.000
42	1	4	mature T-cell proliferation 1	P000433	6438	45912	400	12336	12352	707	11566	11749	730	59	22	0	0	0	0	0	0	0	0	0	0	0	0	0	0	0	0	0	0	0	0	0	0	0	0	0	0	0	0	0.000	0.000	0.000	0.000	0.000	0.000
42	2	4	mature T-cell proliferation 1	P000433	7035	45912	400	12850	12528	737	11822	11918	1391	16	0	0	0	0	0	0	0	0	0	0	0	0	0	0	0	0	0	0	0	0	0	0	0	0	0	0	0	0	0	0.000	0.000	0.000	0.000	0.000	0.000
42	3	4	mature T-cell proliferation 1	P000433	7633	45912	400	13622	13688	1506	11566	11490	598	84	73	0	0	0	0	0	0	0	0	0	0	0	0	0	0	0	0	0	0	0	0	0	0	0	0	0	0	0	0	0.000	0.000	0.000	0.000	0.000	0.000
42	4	4	mature T-cell proliferation 1	P000433	8230	45912	400	12594	12597	777	11052	11117	886	78	44	0	0	0	0	0	0	0	0	0	0	0	0	0	0	0	0	0	0	0	0	0	0	0	0	0	0	0	0	0.000	0.000	0.000	0.000	0.000	0.000
42	5	4	cyclin D2	P000532	8828	45912	400	12594	12580	996	11308	11248	789	61	39	0	0	0	0	0	0	0	0	0	0	0	0	0	0	0	0	0	0	0	0	0	0	0	0	0	0	0	0	0.000	0.000	0.000	0.000	0.000	0.000
42	6	4	cyclin D2	P000532	9425	45912	400	12080	12549	2231	11308	11302	855	47	33	0	0	0	0	0	0	0	0	0	0	0	0	0	0	0	0	0	0	0	0	0	0	0	0	0	0	0	0	0.000	0.000	0.000	0.000	0.000	0.000
42	1	5	cyclin D2	P000532	6438	46665	400	12594	12596	577	11308	11450	759	87	47	0	0	0	0	0	0	0	0	0	0	0	0	0	0	0	0	0	0	0	0	0	0	0	0	0	0	0	0	0.000	0.000	0.000	0.000	0.000	0.000
42	2	5	cyclin D2	P000532	7035	46665	400	12336	12414	872	11308	11309	594	74	45	0	0	0	0	0	0	0	0	0	0	0	0	0	0	0	0	0	0	0	0	0	0	0	0	0	0	0	0	0.000	0.000	0.000	0.000	0.000	0.000
42	3	5	Buffer	n/a	7633	46665	400	11308	11334	662	11566	11635	898	6	0	0	0	0	0	0	0	0	0	0	0	0	0	0	0	0	0	0	0	0	0	0	0	0	0	0	0	0	0	0.000	0.000	0.000	0.000	0.000	0.000
42	4	5	Buffer	n/a	8230	46665	400	11052	11095	883	11566	11674	986	9	0	0	0	0	0	0	0	0	0	0	0	0	0	0	0	0	0	0	0	0	0	0	0	0	0	0	0	0	0	0.000	0.000	0.000	0.000	0.000	0.000
42	5	5	Buffer	n/a	8828	46665	400	11308	12100	2334	10794	10980	718	49	28	0	0	0	0	0	0	0	0	0	0	0	0	0	0	0	0	0	0	0	0	0	0	0	0	0	0	0	0	0.000	0.000	0.000	0.000	0.000	0.000
42	6	5	Buffer	n/a	9425	46665	400	10794	11163	1199	11308	11249	856	17	10	0	0	0	0	0	0	0	0	0	0	0	0	0	0	0	0	0	0	0	0	0	0	0	0	0	0	0	0	0.000	0.000	0.000	0.000	0.000	0.000
43	1	1	Nonphosphopeptide5	empty	10097	43601	400	11052	11207	790	11052	11121	1006	16	3	0	0	0	0	0	0	0	0	0	0	0	0	0	0	0	0	0	0	0	0	0	0	0	0	0	0	0	0	0.000	0.000	0.000	0.000	0.000	0.000
43	2	1	Nonphosphopeptide5	empty	10694	43601	400	11052	11327	1391	11052	11538	2098	11	1	0	0	0	0	0	0	0	0	0	0	0	0	0	0	0	0	0	0	0	0	0	0	0	0	0	0	0	0	0.000	0.000	0.000	0.000	0.000	0.000
43	3	1	empty	empty	11292	43601	400	10794	11648	2051	10794	10869	1005	31	21	0	0	0	0	0	0	0	0	0	0	0	0	0	0	0	0	0	0	0	0	0	0	0	0	0	0	0	0	0.000	0.000	0.000	0.000	0.000	0.000
43	4	1	empty	empty	11889	43601	400	11052	11877	2588	10538	10667	1663	25	18	0	0	0	0	0	0	0	0	0	0	0	0	0	0	0	0	0	0	0	0	0	0	0	0	0	0	0	0	0.000	0.000	0.000	0.000	0.000	0.000
43	5	1	empty	empty	12487	43601	400	10538	10874	1334	10280	10364	1031	21	10	0	0	0	0	0	0	0	0	0	0	0	0	0	0	0	0	0	0	0	0	0	0	0	0	0	0	0	0	0.000	0.000	0.000	0.000	0.000	0.000
43	6	1	empty	empty	13084	43601	400	10538	10768	755	10280	11261	2689	1	0	0	0	0	0	0	0	0	0	0	0	0	0	0	0	0	0	0	0	0	0	0	0	0	0	0	0	0	0	0.000	0.000	0.000	0.000	0.000	0.000
43	1	2	protein kinase C; iota	P000021	10097	44355	400	13108	13686	2688	10794	10928	527	79	73	0	0	0	0	0	0	0	0	0	0	0	0	0	0	0	0	0	0	0	0	0	0	0	0	0	0	0	0	0.000	0.000	0.000	0.000	0.000	0.000
43	2	2	protein kinase C; iota	P000021	10694	44355	400	12080	12223	838	10538	10984	1631	43	5	0	0	0	0	0	0	0	0	0	0	0	0	0	0	0	0	0	0	0	0	0	0	0	0	0	0	0	0	0.000	0.000	0.000	0.000	0.000	0.000
43	3	2	protein kinase C; iota	P000021	11292	44355	400	11308	12002	2004	11052	11561	1642	22	14	0	0	0	0	0	0	0	0	0	0	0	0	0	0	0	0	0	0	0	0	0	0	0	0	0	0	0	0	0.000	0.000	0.000	0.000	0.000	0.000
43	4	2	protein kinase C; iota	P000021	11889	44355	400	12080	12062	928	10794	10722	1048	53	17	0	0	0	0	0	0	0	0	0	0	0	0	0	0	0	0	0	0	0	0	0	0	0	0	0	0	0	0	0.000	0.000	0.000	0.000	0.000	0.000
43	5	2	exostoses (multiple) 1	P000105	12487	44355	400	11822	11970	1244	10538	10572	842	61	37	0	0	0	0	0	0	0	0	0	0	0	0	0	0	0	0	0	0	0	0	0	0	0	0	0	0	0	0	0.000	0.000	0.000	0.000	0.000	0.000
43	6	2	exostoses (multiple) 1	P000105	13084	44355	400	11566	11769	1445	10538	10804	763	61	40	0	0	0	0	0	0	0	0	0	0	0	0	0	0	0	0	0	0	0	0	0	0	0	0	0	0	0	0	0.000	0.000	0.000	0.000	0.000	0.000
43	1	3	exostoses (multiple) 1	P000105	10097	45108	400	11566	11566	824	11052	11470	1458	16	0	0	0	0	0	0	0	0	0	0	0	0	0	0	0	0	0	0	0	0	0	0	0	0	0	0	0	0	0	0.000	0.000	0.000	0.000	0.000	0.000
43	2	3	exostoses (multiple) 1	P000105	10694	45108	400	11308	11324	617	10280	10175	774	64	14	0	0	0	0	0	0	0	0	0	0	0	0	0	0	0	0	0	0	0	0	0	0	0	0	0	0	0	0	0.000	0.000	0.000	0.000	0.000	0.000
43	3	3	enhancer of zeste homolog 2 (Drosophila); transcript variant 1	P000308	11292	45108	400	11308	11273	881	10794	10711	1222	21	0	0	0	0	0	0	0	0	0	0	0	0	0	0	0	0	0	0	0	0	0	0	0	0	0	0	0	0	0	0.000	0.000	0.000	0.000	0.000	0.000
43	4	3	enhancer of zeste homolog 2 (Drosophila); transcript variant 1	P000308	11889	45108	400	11822	11797	1457	10538	10832	1223	52	19	0	0	0	0	0	0	0	0	0	0	0	0	0	0	0	0	0	0	0	0	0	0	0	0	0	0	0	0	0.000	0.000	0.000	0.000	0.000	0.000
43	5	3	enhancer of zeste homolog 2 (Drosophila); transcript variant 1	P000308	12487	45108	400	11822	12257	2117	10794	10966	1158	44	26	0	0	0	0	0	0	0	0	0	0	0	0	0	0	0	0	0	0	0	0	0	0	0	0	0	0	0	0	0.000	0.000	0.000	0.000	0.000	0.000
43	6	3	enhancer of zeste homolog 2 (Drosophila); transcript variant 1	P000308	13084	45108	400	11822	11843	859	10794	10939	946	53	15	0	0	0	0	0	0	0	0	0	0	0	0	0	0	0	0	0	0	0	0	0	0	0	0	0	0	0	0	0.000	0.000	0.000	0.000	0.000	0.000
43	1	4	APEX nuclease (multifunctional DNA repair enzyme) 1; transcript variant 1	P000407	10097	45862	400	12336	12337	1039	10794	11244	2003	38	0	0	0	0	0	0	0	0	0	0	0	0	0	0	0	0	0	0	0	0	0	0	0	0	0	0	0	0	0	0.000	0.000	0.000	0.000	0.000	0.000
43	2	4	APEX nuclease (multifunctional DNA repair enzyme) 1; transcript variant 1	P000407	10694	45862	400	12594	12810	1141	10538	10515	581	96	92	0	0	0	0	0	0	0	0	0	0	0	0	0	0	0	0	0	0	0	0	0	0	0	0	0	0	0	0	0.000	0.000	0.000	0.000	0.000	0.000
43	3	4	APEX nuclease (multifunctional DNA repair enzyme) 1; transcript variant 1	P000407	11292	45862	400	12850	13592	3103	10280	10227	764	91	72	0	0	0	0	0	0	0	0	0	0	0	0	0	0	0	0	0	0	0	0	0	0	0	0	0	0	0	0	0.000	0.000	0.000	0.000	0.000	0.000
43	4	4	APEX nuclease (multifunctional DNA repair enzyme) 1; transcript variant 1	P000407	11889	45862	400	11822	11877	569	10280	10299	836	88	42	0	0	0	0	0	0	0	0	0	0	0	0	0	0	0	0	0	0	0	0	0	0	0	0	0	0	0	0	0.000	0.000	0.000	0.000	0.000	0.000
43	5	4	inhibin; beta A (activin A; activin AB alpha polypeptide)	P000505	12487	45862	400	11308	11432	963	11308	11503	1593	7	0	0	0	0	0	0	0	0	0	0	0	0	0	0	0	0	0	0	0	0	0	0	0	0	0	0	0	0	0	0.000	0.000	0.000	0.000	0.000	0.000
43	6	4	inhibin; beta A (activin A; activin AB alpha polypeptide)	P000505	13084	45862	400	11566	11613	874	10794	10952	1023	50	9	0	0	0	0	0	0	0	0	0	0	0	0	0	0	0	0	0	0	0	0	0	0	0	0	0	0	0	0	0.000	0.000	0.000	0.000	0.000	0.000
43	1	5	inhibin; beta A (activin A; activin AB alpha polypeptide)	P000505	10097	46615	400	12080	12231	1190	10538	10629	659	82	52	0	0	0	0	0	0	0	0	0	0	0	0	0	0	0	0	0	0	0	0	0	0	0	0	0	0	0	0	0.000	0.000	0.000	0.000	0.000	0.000
43	2	5	inhibin; beta A (activin A; activin AB alpha polypeptide)	P000505	10694	46615	400	11052	11175	583	10280	10594	867	34	11	0	0	0	0	0	0	0	0	0	0	0	0	0	0	0	0	0	0	0	0	0	0	0	0	0	0	0	0	0.000	0.000	0.000	0.000	0.000	0.000
43	3	5	activin A receptor; type I	P001021	11292	46615	400	11822	11935	815	10280	10337	695	87	58	0	0	0	0	0	0	0	0	0	0	0	0	0	0	0	0	0	0	0	0	0	0	0	0	0	0	0	0	0.000	0.000	0.000	0.000	0.000	0.000
43	4	5	activin A receptor; type I	P001021	11889	46615	400	12336	12557	1294	10794	10694	738	79	56	0	0	0	0	0	0	0	0	0	0	0	0	0	0	0	0	0	0	0	0	0	0	0	0	0	0	0	0	0.000	0.000	0.000	0.000	0.000	0.000
43	5	5	activin A receptor; type I	P001021	12487	46615	400	12080	12205	746	11052	10984	757	79	28	0	0	0	0	0	0	0	0	0	0	0	0	0	0	0	0	0	0	0	0	0	0	0	0	0	0	0	0	0.000	0.000	0.000	0.000	0.000	0.000
43	6	5	activin A receptor; type I	P001021	13084	46615	400	12336	13721	4239	10280	10146	439	90	81	0	0	0	0	0	0	0	0	0	0	0	0	0	0	0	0	0	0	0	0	0	0	0	0	0	0	0	0	0.000	0.000	0.000	0.000	0.000	0.000
44	1	1	Cy5/Cy3 labeled biotin-BSA marker proteins	n/a	13682	43625	400	11052	11031	733	10538	10544	693	45	10	0	0	0	0	0	0	0	0	0	0	0	0	0	0	0	0	0	0	0	0	0	0	0	0	0	0	0	0	0.000	0.000	0.000	0.000	0.000	0.000
44	2	1	Cy5/Cy3 labeled biotin-BSA marker proteins	n/a	14279	43625	400	10794	11053	914	11052	11073	1020	19	3	0	0	0	0	0	0	0	0	0	0	0	0	0	0	0	0	0	0	0	0	0	0	0	0	0	0	0	0	0.000	0.000	0.000	0.000	0.000	0.000
44	3	1	empty	empty	14877	43625	400	11308	11249	829	11052	11307	1169	14	0	0	0	0	0	0	0	0	0	0	0	0	0	0	0	0	0	0	0	0	0	0	0	0	0	0	0	0	0	0.000	0.000	0.000	0.000	0.000	0.000
44	4	1	empty	empty	15474	43625	400	11052	10971	878	10794	10757	692	28	10	0	0	0	0	0	0	0	0	0	0	0	0	0	0	0	0	0	0	0	0	0	0	0	0	0	0	0	0	0.000	0.000	0.000	0.000	0.000	0.000
44	5	1	empty	empty	16072	43625	400	10794	10798	857	11052	11076	857	9	0	0	0	0	0	0	0	0	0	0	0	0	0	0	0	0	0	0	0	0	0	0	0	0	0	0	0	0	0	0.000	0.000	0.000	0.000	0.000	0.000
44	6	1	empty	empty	16669	43625	400	10280	11173	2196	10280	10804	2370	15	7	0	0	0	0	0	0	0	0	0	0	0	0	0	0	0	0	0	0	0	0	0	0	0	0	0	0	0	0	0.000	0.000	0.000	0.000	0.000	0.000
44	1	2	Buffer	n/a	13682	44379	400	10794	11059	1255	10280	10370	701	45	23	0	0	0	0	0	0	0	0	0	0	0	0	0	0	0	0	0	0	0	0	0	0	0	0	0	0	0	0	0.000	0.000	0.000	0.000	0.000	0.000
44	2	2	Buffer	n/a	14279	44379	400	12080	12355	1223	11308	11481	1285	42	19	0	0	0	0	0	0	0	0	0	0	0	0	0	0	0	0	0	0	0	0	0	0	0	0	0	0	0	0	0.000	0.000	0.000	0.000	0.000	0.000
44	3	2	Buffer	n/a	14877	44379	400	11052	11104	938	10794	11145	1259	21	2	0	0	0	0	0	0	0	0	0	0	0	0	0	0	0	0	0	0	0	0	0	0	0	0	0	0	0	0	0.000	0.000	0.000	0.000	0.000	0.000
44	4	2	Buffer	n/a	15474	44379	400	11052	11003	1053	10280	11334	2849	5	0	0	0	0	0	0	0	0	0	0	0	0	0	0	0	0	0	0	0	0	0	0	0	0	0	0	0	0	0	0.000	0.000	0.000	0.000	0.000	0.000
44	5	2	casein kinase 2; alpha 1 polypeptide; transcript variant 2	P000084	16072	44379	400	13878	14291	2436	10794	10680	1043	87	62	0	0	0	0	0	0	0	0	0	0	0	0	0	0	0	0	0	0	0	0	0	0	0	0	0	0	0	0	0.000	0.000	0.000	0.000	0.000	0.000
44	6	2	casein kinase 2; alpha 1 polypeptide; transcript variant 2	P000084	16669	44379	400	14136	13832	1728	10024	10223	1034	91	80	0	0	0	0	0	0	0	0	0	0	0	0	0	0	0	0	0	0	0	0	0	0	0	0	0	0	0	0	0.000	0.000	0.000	0.000	0.000	0.000
44	1	3	casein kinase 2; alpha 1 polypeptide; transcript variant 2	P000084	13682	45132	400	12850	13691	2110	10538	10779	873	98	70	0	0	0	0	0	0	0	0	0	0	0	0	0	0	0	0	0	0	0	0	0	0	0	0	0	0	0	0	0.000	0.000	0.000	0.000	0.000	0.000
44	2	3	casein kinase 2; alpha 1 polypeptide; transcript variant 2	P000084	14279	45132	400	14392	14880	2207	11052	10813	917	96	84	0	0	0	0	0	0	0	0	0	0	0	0	0	0	0	0	0	0	0	0	0	0	0	0	0	0	0	0	0.000	0.000	0.000	0.000	0.000	0.000
44	3	3	MCM5 minichromosome maintenance deficient 5; cell division cycle 46 (S. cerevisiae)	P000290	14877	45132	400	11822	12021	977	10538	10576	508	89	73	0	0	0	0	0	0	0	0	0	0	0	0	0	0	0	0	0	0	0	0	0	0	0	0	0	0	0	0	0.000	0.000	0.000	0.000	0.000	0.000
44	4	3	MCM5 minichromosome maintenance deficient 5; cell division cycle 46 (S. cerevisiae)	P000290	15474	45132	400	12080	14105	4986	10794	11806	2748	30	21	0	0	0	0	0	0	0	0	0	0	0	0	0	0	0	0	0	0	0	0	0	0	0	0	0	0	0	0	0.000	0.000	0.000	0.000	0.000	0.000
44	5	3	MCM5 minichromosome maintenance deficient 5; cell division cycle 46 (S. cerevisiae)	P000290	16072	45132	400	11822	11548	1019	10280	10581	900	77	36	0	0	0	0	0	0	0	0	0	0	0	0	0	0	0	0	0	0	0	0	0	0	0	0	0	0	0	0	0.000	0.000	0.000	0.000	0.000	0.000
44	6	3	MCM5 minichromosome maintenance deficient 5; cell division cycle 46 (S. cerevisiae)	P000290	16669	45132	400	12336	12746	1410	10538	10946	2172	42	10	0	0	0	0	0	0	0	0	0	0	0	0	0	0	0	0	0	0	0	0	0	0	0	0	0	0	0	0	0.000	0.000	0.000	0.000	0.000	0.000
44	1	4	phosphodiesterase 4A; cAMP-specific (phosphodiesterase E2 dunce homolog; Drosophila)	P000374	13682	45886	400	12080	12028	1104	10538	11143	2368	16	0	0	0	0	0	0	0	0	0	0	0	0	0	0	0	0	0	0	0	0	0	0	0	0	0	0	0	0	0	0.000	0.000	0.000	0.000	0.000	0.000
44	2	4	phosphodiesterase 4A; cAMP-specific (phosphodiesterase E2 dunce homolog; Drosophila)	P000374	14279	45886	400	12080	13445	4454	10280	10301	1160	60	43	0	0	0	0	0	0	0	0	0	0	0	0	0	0	0	0	0	0	0	0	0	0	0	0	0	0	0	0	0.000	0.000	0.000	0.000	0.000	0.000
44	3	4	phosphodiesterase 4A; cAMP-specific (phosphodiesterase E2 dunce homolog; Drosophila)	P000374	14877	45886	400	11052	11045	686	10538	10463	728	42	10	0	0	0	0	0	0	0	0	0	0	0	0	0	0	0	0	0	0	0	0	0	0	0	0	0	0	0	0	0.000	0.000	0.000	0.000	0.000	0.000
44	4	4	phosphodiesterase 4A; cAMP-specific (phosphodiesterase E2 dunce homolog; Drosophila)	P000374	15474	45886	400	11822	11999	1047	10538	11052	2251	24	1	0	0	0	0	0	0	0	0	0	0	0	0	0	0	0	0	0	0	0	0	0	0	0	0	0	0	0	0	0.000	0.000	0.000	0.000	0.000	0.000
44	5	4	bone morphogenetic protein 7 (osteogenic protein 1)	P000479	16072	45886	400	11308	12763	3762	10280	10366	682	64	41	0	0	0	0	0	0	0	0	0	0	0	0	0	0	0	0	0	0	0	0	0	0	0	0	0	0	0	0	0.000	0.000	0.000	0.000	0.000	0.000
44	6	4	bone morphogenetic protein 7 (osteogenic protein 1)	P000479	16669	45886	400	11566	11642	852	10024	11134	3603	0	0	0	0	0	0	0	0	0	0	0	0	0	0	0	0	0	0	0	0	0	0	0	0	0	0	0	0	0	0	0.000	0.000	0.000	0.000	0.000	0.000
44	1	5	bone morphogenetic protein 7 (osteogenic protein 1)	P000479	13682	46639	400	12080	11907	746	10280	10677	1240	71	13	0	0	0	0	0	0	0	0	0	0	0	0	0	0	0	0	0	0	0	0	0	0	0	0	0	0	0	0	0.000	0.000	0.000	0.000	0.000	0.000
44	2	5	bone morphogenetic protein 7 (osteogenic protein 1)	P000479	14279	46639	400	12336	12375	878	10280	10401	722	98	73	0	0	0	0	0	0	0	0	0	0	0	0	0	0	0	0	0	0	0	0	0	0	0	0	0	0	0	0	0.000	0.000	0.000	0.000	0.000	0.000
44	3	5	thyroid hormone receptor-associated protein (100 kDa)	P000597	14877	46639	400	11822	11901	704	10280	10378	933	87	31	0	0	0	0	0	0	0	0	0	0	0	0	0	0	0	0	0	0	0	0	0	0	0	0	0	0	0	0	0.000	0.000	0.000	0.000	0.000	0.000
44	4	5	thyroid hormone receptor-associated protein (100 kDa)	P000597	15474	46639	400	11566	11666	969	10794	10657	839	45	20	0	0	0	0	0	0	0	0	0	0	0	0	0	0	0	0	0	0	0	0	0	0	0	0	0	0	0	0	0.000	0.000	0.000	0.000	0.000	0.000
44	5	5	thyroid hormone receptor-associated protein (100 kDa)	P000597	16072	46639	400	11566	11760	1178	10280	10460	690	72	46	0	0	0	0	0	0	0	0	0	0	0	0	0	0	0	0	0	0	0	0	0	0	0	0	0	0	0	0	0.000	0.000	0.000	0.000	0.000	0.000
44	6	5	thyroid hormone receptor-associated protein (100 kDa)	P000597	16669	46639	400	12080	12018	938	10794	10728	876	65	32	0	0	0	0	0	0	0	0	0	0	0	0	0	0	0	0	0	0	0	0	0	0	0	0	0	0	0	0	0.000	0.000	0.000	0.000	0.000	0.000
45	1	1	Cy5/Cy3 labeled biotin-BSA marker proteins	n/a	2804	47408	400	12594	12517	584	12594	12637	911	6	0	0	0	0	0	0	0	0	0	0	0	0	0	0	0	0	0	0	0	0	0	0	0	0	0	0	0	0	0	0.000	0.000	0.000	0.000	0.000	0.000
45	2	1	Cy5/Cy3 labeled biotin-BSA marker proteins	n/a	3401	47408	400	12594	12560	813	13108	12887	1108	3	1	0	0	0	0	0	0	0	0	0	0	0	0	0	0	0	0	0	0	0	0	0	0	0	0	0	0	0	0	0.000	0.000	0.000	0.000	0.000	0.000
45	3	1	empty	empty	3999	47408	400	12336	13071	2274	13108	12987	939	14	11	0	0	0	0	0	0	0	0	0	0	0	0	0	0	0	0	0	0	0	0	0	0	0	0	0	0	0	0	0.000	0.000	0.000	0.000	0.000	0.000
45	4	1	empty	empty	4596	47408	400	12336	12411	959	12594	12670	733	21	2	0	0	0	0	0	0	0	0	0	0	0	0	0	0	0	0	0	0	0	0	0	0	0	0	0	0	0	0	0.000	0.000	0.000	0.000	0.000	0.000
45	5	1	empty	empty	5194	47408	400	12080	12654	1452	12080	12089	811	20	13	0	0	0	0	0	0	0	0	0	0	0	0	0	0	0	0	0	0	0	0	0	0	0	0	0	0	0	0	0.000	0.000	0.000	0.000	0.000	0.000
45	6	1	empty	empty	5791	47408	400	11822	11874	682	11822	11883	615	15	7	0	0	0	0	0	0	0	0	0	0	0	0	0	0	0	0	0	0	0	0	0	0	0	0	0	0	0	0	0.000	0.000	0.000	0.000	0.000	0.000
45	1	2	casein kinase 1; delta; transcript variant 1	P000067	2804	48162	400	13364	13433	641	12850	12904	617	42	22	0	0	0	0	0	0	0	0	0	0	0	0	0	0	0	0	0	0	0	0	0	0	0	0	0	0	0	0	0.000	0.000	0.000	0.000	0.000	0.000
45	2	2	casein kinase 1; delta; transcript variant 1	P000067	3401	48162	400	13364	14397	2682	12850	12792	863	38	29	0	0	0	0	0	0	0	0	0	0	0	0	0	0	0	0	0	0	0	0	0	0	0	0	0	0	0	0	0.000	0.000	0.000	0.000	0.000	0.000
45	3	2	casein kinase 1; delta; transcript variant 1	P000067	3999	48162	400	12850	12952	903	12594	12430	736	30	11	0	0	0	0	0	0	0	0	0	0	0	0	0	0	0	0	0	0	0	0	0	0	0	0	0	0	0	0	0.000	0.000	0.000	0.000	0.000	0.000
45	4	2	casein kinase 1; delta; transcript variant 1	P000067	4596	48162	400	12850	13136	1101	12594	12790	923	33	9	0	0	0	0	0	0	0	0	0	0	0	0	0	0	0	0	0	0	0	0	0	0	0	0	0	0	0	0	0.000	0.000	0.000	0.000	0.000	0.000
45	5	2	B-cell CLL/lymphoma 10	P000239	5194	48162	400	13622	13530	1214	11822	11861	820	67	52	0	0	0	0	0	0	0	0	0	0	0	0	0	0	0	0	0	0	0	0	0	0	0	0	0	0	0	0	0.000	0.000	0.000	0.000	0.000	0.000
45	6	2	B-cell CLL/lymphoma 10	P000239	5791	48162	400	12850	13166	1036	11566	11482	677	82	48	0	0	0	0	0	0	0	0	0	0	0	0	0	0	0	0	0	0	0	0	0	0	0	0	0	0	0	0	0.000	0.000	0.000	0.000	0.000	0.000
45	1	3	B-cell CLL/lymphoma 10	P000239	2804	48915	400	14650	15278	2323	12594	12740	599	86	77	0	0	0	0	0	0	0	0	0	0	0	0	0	0	0	0	0	0	0	0	0	0	0	0	0	0	0	0	0.000	0.000	0.000	0.000	0.000	0.000
45	2	3	B-cell CLL/lymphoma 10	P000239	3401	48915	400	15164	14850	1223	12850	12740	714	82	65	0	0	0	0	0	0	0	0	0	0	0	0	0	0	0	0	0	0	0	0	0	0	0	0	0	0	0	0	0.000	0.000	0.000	0.000	0.000	0.000
45	3	3	guanine nucleotide binding protein (G protein); alpha activating activity polypeptide O	P000348	3999	48915	400	13878	13702	826	12594	12644	1350	38	0	0	0	0	0	0	0	0	0	0	0	0	0	0	0	0	0	0	0	0	0	0	0	0	0	0	0	0	0	0.000	0.000	0.000	0.000	0.000	0.000
45	4	3	guanine nucleotide binding protein (G protein); alpha activating activity polypeptide O	P000348	4596	48915	400	13878	13600	690	12080	12093	730	89	65	0	0	0	0	0	0	0	0	0	0	0	0	0	0	0	0	0	0	0	0	0	0	0	0	0	0	0	0	0.000	0.000	0.000	0.000	0.000	0.000
45	5	3	guanine nucleotide binding protein (G protein); alpha activating activity polypeptide O	P000348	5194	48915	400	13364	13103	1004	11822	12309	1199	67	8	0	0	0	0	0	0	0	0	0	0	0	0	0	0	0	0	0	0	0	0	0	0	0	0	0	0	0	0	0.000	0.000	0.000	0.000	0.000	0.000
45	6	3	guanine nucleotide binding protein (G protein); alpha activating activity polypeptide O	P000348	5791	48915	400	13108	15770	6673	11566	11883	1228	61	29	0	0	0	0	0	0	0	0	0	0	0	0	0	0	0	0	0	0	0	0	0	0	0	0	0	0	0	0	0.000	0.000	0.000	0.000	0.000	0.000
45	1	4	GATA binding protein 3	P000449	2804	49669	400	14650	15171	2261	12850	12850	517	81	69	0	0	0	0	0	0	0	0	0	0	0	0	0	0	0	0	0	0	0	0	0	0	0	0	0	0	0	0	0.000	0.000	0.000	0.000	0.000	0.000
45	2	4	GATA binding protein 3	P000449	3401	49669	400	13622	14699	4267	12594	12679	924	62	33	0	0	0	0	0	0	0	0	0	0	0	0	0	0	0	0	0	0	0	0	0	0	0	0	0	0	0	0	0.000	0.000	0.000	0.000	0.000	0.000
45	3	4	GATA binding protein 3	P000449	3999	49669	400	13364	13510	805	12850	13291	1788	11	0	0	0	0	0	0	0	0	0	0	0	0	0	0	0	0	0	0	0	0	0	0	0	0	0	0	0	0	0	0.000	0.000	0.000	0.000	0.000	0.000
45	4	4	GATA binding protein 3	P000449	4596	49669	400	14136	14293	1993	12594	12969	2162	34	9	0	0	0	0	0	0	0	0	0	0	0	0	0	0	0	0	0	0	0	0	0	0	0	0	0	0	0	0	0.000	0.000	0.000	0.000	0.000	0.000
45	5	4	cyclin-dependent kinase inhibitor 2B (p15; inhibits CDK4)	P000559	5194	49669	400	12850	12792	651	12080	12051	734	65	13	0	0	0	0	0	0	0	0	0	0	0	0	0	0	0	0	0	0	0	0	0	0	0	0	0	0	0	0	0.000	0.000	0.000	0.000	0.000	0.000
45	6	4	cyclin-dependent kinase inhibitor 2B (p15; inhibits CDK4)	P000559	5791	49669	400	12080	12176	1028	11822	11693	935	32	8	0	0	0	0	0	0	0	0	0	0	0	0	0	0	0	0	0	0	0	0	0	0	0	0	0	0	0	0	0.000	0.000	0.000	0.000	0.000	0.000
45	1	5	cyclin-dependent kinase inhibitor 2B (p15; inhibits CDK4)	P000559	2804	50422	400	13622	13615	575	12850	12969	695	60	13	0	0	0	0	0	0	0	0	0	0	0	0	0	0	0	0	0	0	0	0	0	0	0	0	0	0	0	0	0.000	0.000	0.000	0.000	0.000	0.000
45	2	5	cyclin-dependent kinase inhibitor 2B (p15; inhibits CDK4)	P000559	3401	50422	400	13878	14880	3232	12465	12565	636	71	53	0	0	0	0	0	0	0	0	0	0	0	0	0	0	0	0	0	0	0	0	0	0	0	0	0	0	0	0	0.000	0.000	0.000	0.000	0.000	0.000
45	3	5	Buffer	n/a	3999	50422	400	13108	13562	2057	12594	12508	1006	27	14	0	0	0	0	0	0	0	0	0	0	0	0	0	0	0	0	0	0	0	0	0	0	0	0	0	0	0	0	0.000	0.000	0.000	0.000	0.000	0.000
45	4	5	Buffer	n/a	4596	50422	400	12594	12657	693	12336	12467	1098	14	0	0	0	0	0	0	0	0	0	0	0	0	0	0	0	0	0	0	0	0	0	0	0	0	0	0	0	0	0	0.000	0.000	0.000	0.000	0.000	0.000
45	5	5	Buffer	n/a	5194	50422	400	12080	11959	561	12080	12340	1175	0	0	0	0	0	0	0	0	0	0	0	0	0	0	0	0	0	0	0	0	0	0	0	0	0	0	0	0	0	0	0.000	0.000	0.000	0.000	0.000	0.000
45	6	5	Buffer	n/a	5791	50422	400	11308	11742	3124	11822	12295	2243	8	6	0	0	0	0	0	0	0	0	0	0	0	0	0	0	0	0	0	0	0	0	0	0	0	0	0	0	0	0	0.000	0.000	0.000	0.000	0.000	0.000
46	1	1	BSA6	n/a	6413	47334	400	11052	11108	654	11566	11786	1573	0	0	0	0	0	0	0	0	0	0	0	0	0	0	0	0	0	0	0	0	0	0	0	0	0	0	0	0	0	0	0.000	0.000	0.000	0.000	0.000	0.000
46	2	1	BSA6	n/a	7010	47334	400	11052	10928	685	11052	11115	852	8	0	0	0	0	0	0	0	0	0	0	0	0	0	0	0	0	0	0	0	0	0	0	0	0	0	0	0	0	0	0.000	0.000	0.000	0.000	0.000	0.000
46	3	1	empty	empty	7608	47334	400	11308	11923	1869	11308	11265	925	17	12	0	0	0	0	0	0	0	0	0	0	0	0	0	0	0	0	0	0	0	0	0	0	0	0	0	0	0	0	0.000	0.000	0.000	0.000	0.000	0.000
46	4	1	empty	empty	8205	47334	400	11822	12289	1736	11308	11305	814	39	17	0	0	0	0	0	0	0	0	0	0	0	0	0	0	0	0	0	0	0	0	0	0	0	0	0	0	0	0	0.000	0.000	0.000	0.000	0.000	0.000
46	5	1	empty	empty	8803	47334	400	10794	10612	614	10794	10824	617	3	0	0	0	0	0	0	0	0	0	0	0	0	0	0	0	0	0	0	0	0	0	0	0	0	0	0	0	0	0	0.000	0.000	0.000	0.000	0.000	0.000
46	6	1	empty	empty	9400	47334	400	11052	11688	1890	11308	11466	848	26	20	0	0	0	0	0	0	0	0	0	0	0	0	0	0	0	0	0	0	0	0	0	0	0	0	0	0	0	0	0.000	0.000	0.000	0.000	0.000	0.000
46	1	2	mitogen-activated protein kinase 13	P000043	6413	48088	400	15164	15696	3008	11308	11526	1432	85	65	0	0	0	0	0	0	0	0	0	0	0	0	0	0	0	0	0	0	0	0	0	0	0	0	0	0	0	0	0.000	0.000	0.000	0.000	0.000	0.000
46	2	2	mitogen-activated protein kinase 13	P000043	7010	48088	400	14392	14201	1268	11052	11699	2898	66	0	0	0	0	0	0	0	0	0	0	0	0	0	0	0	0	0	0	0	0	0	0	0	0	0	0	0	0	0	0.000	0.000	0.000	0.000	0.000	0.000
46	3	2	mitogen-activated protein kinase 13	P000043	7608	48088	400	13364	13317	1168	10794	10872	752	94	84	0	0	0	0	0	0	0	0	0	0	0	0	0	0	0	0	0	0	0	0	0	0	0	0	0	0	0	0	0.000	0.000	0.000	0.000	0.000	0.000
46	4	2	mitogen-activated protein kinase 13	P000043	8205	48088	400	13622	13951	1865	11308	11094	679	90	78	0	0	0	0	0	0	0	0	0	0	0	0	0	0	0	0	0	0	0	0	0	0	0	0	0	0	0	0	0.000	0.000	0.000	0.000	0.000	0.000
46	5	2	protein tyrosine phosphatase; non-receptor type 11 (Noonan syndrome 1)	P000157	8803	48088	400	13108	14566	4266	10794	10708	1047	76	52	0	0	0	0	0	0	0	0	0	0	0	0	0	0	0	0	0	0	0	0	0	0	0	0	0	0	0	0	0.000	0.000	0.000	0.000	0.000	0.000
46	6	2	protein tyrosine phosphatase; non-receptor type 11 (Noonan syndrome 1)	P000157	9400	48088	400	12594	12455	772	11052	11090	584	82	64	0	0	0	0	0	0	0	0	0	0	0	0	0	0	0	0	0	0	0	0	0	0	0	0	0	0	0	0	0.000	0.000	0.000	0.000	0.000	0.000
46	1	3	protein tyrosine phosphatase; non-receptor type 11 (Noonan syndrome 1)	P000157	6413	48841	400	13108	14032	3130	11566	11381	553	72	58	0	0	0	0	0	0	0	0	0	0	0	0	0	0	0	0	0	0	0	0	0	0	0	0	0	0	0	0	0.000	0.000	0.000	0.000	0.000	0.000
46	2	3	protein tyrosine phosphatase; non-receptor type 11 (Noonan syndrome 1)	P000157	7010	48841	400	12594	12631	1101	11566	11928	1705	28	0	0	0	0	0	0	0	0	0	0	0	0	0	0	0	0	0	0	0	0	0	0	0	0	0	0	0	0	0	0.000	0.000	0.000	0.000	0.000	0.000
46	3	3	guanine nucleotide binding protein (G protein); gamma 4	P000330	7608	48841	400	11822	11801	773	11052	11881	3025	0	0	0	0	0	0	0	0	0	0	0	0	0	0	0	0	0	0	0	0	0	0	0	0	0	0	0	0	0	0	0.000	0.000	0.000	0.000	0.000	0.000
46	4	3	guanine nucleotide binding protein (G protein); gamma 4	P000330	8205	48841	400	11566	11664	825	11308	11333	1106	19	1	0	0	0	0	0	0	0	0	0	0	0	0	0	0	0	0	0	0	0	0	0	0	0	0	0	0	0	0	0.000	0.000	0.000	0.000	0.000	0.000
46	5	3	guanine nucleotide binding protein (G protein); gamma 4	P000330	8803	48841	400	11822	12143	1433	11052	11216	1398	32	12	0	0	0	0	0	0	0	0	0	0	0	0	0	0	0	0	0	0	0	0	0	0	0	0	0	0	0	0	0.000	0.000	0.000	0.000	0.000	0.000
46	6	3	guanine nucleotide binding protein (G protein); gamma 4	P000330	9400	48841	400	10538	10999	1536	10794	10769	798	20	13	0	0	0	0	0	0	0	0	0	0	0	0	0	0	0	0	0	0	0	0	0	0	0	0	0	0	0	0	0.000	0.000	0.000	0.000	0.000	0.000
46	1	4	matrix metalloproteinase 2 (gelatinase A; 72kDa gelatinase; 72kDa type IV collagenase)	P000434	6413	49595	400	13108	13251	1559	11308	11445	816	71	51	0	0	0	0	0	0	0	0	0	0	0	0	0	0	0	0	0	0	0	0	0	0	0	0	0	0	0	0	0.000	0.000	0.000	0.000	0.000	0.000
46	2	4	matrix metalloproteinase 2 (gelatinase A; 72kDa gelatinase; 72kDa type IV collagenase)	P000434	7010	49595	400	11822	12362	1751	11308	11408	997	38	26	0	0	0	0	0	0	0	0	0	0	0	0	0	0	0	0	0	0	0	0	0	0	0	0	0	0	0	0	0.000	0.000	0.000	0.000	0.000	0.000
46	3	4	matrix metalloproteinase 2 (gelatinase A; 72kDa gelatinase; 72kDa type IV collagenase)	P000434	7608	49595	400	11822	13269	4027	10794	11190	1436	38	24	0	0	0	0	0	0	0	0	0	0	0	0	0	0	0	0	0	0	0	0	0	0	0	0	0	0	0	0	0.000	0.000	0.000	0.000	0.000	0.000
46	4	4	matrix metalloproteinase 2 (gelatinase A; 72kDa gelatinase; 72kDa type IV collagenase)	P000434	8205	49595	400	11566	11802	1592	10794	11051	955	47	26	0	0	0	0	0	0	0	0	0	0	0	0	0	0	0	0	0	0	0	0	0	0	0	0	0	0	0	0	0.000	0.000	0.000	0.000	0.000	0.000
46	5	4	ELK3; ETS-domain protein (SRF accessory protein 2)	P000533	8803	49595	400	11052	11137	1201	10538	10573	892	41	19	0	0	0	0	0	0	0	0	0	0	0	0	0	0	0	0	0	0	0	0	0	0	0	0	0	0	0	0	0.000	0.000	0.000	0.000	0.000	0.000
46	6	4	ELK3; ETS-domain protein (SRF accessory protein 2)	P000533	9400	49595	400	11052	11162	805	10538	10491	624	45	28	0	0	0	0	0	0	0	0	0	0	0	0	0	0	0	0	0	0	0	0	0	0	0	0	0	0	0	0	0.000	0.000	0.000	0.000	0.000	0.000
46	1	5	ELK3; ETS-domain protein (SRF accessory protein 2)	P000533	6413	50348	400	11822	11942	898	11052	11344	1361	30	0	0	0	0	0	0	0	0	0	0	0	0	0	0	0	0	0	0	0	0	0	0	0	0	0	0	0	0	0	0.000	0.000	0.000	0.000	0.000	0.000
46	2	5	ELK3; ETS-domain protein (SRF accessory protein 2)	P000533	7010	50348	400	12080	12599	1728	11566	11630	1065	36	22	0	0	0	0	0	0	0	0	0	0	0	0	0	0	0	0	0	0	0	0	0	0	0	0	0	0	0	0	0.000	0.000	0.000	0.000	0.000	0.000
46	3	5	Buffer	n/a	7608	50348	400	11308	12063	2282	11052	11306	1527	28	17	0	0	0	0	0	0	0	0	0	0	0	0	0	0	0	0	0	0	0	0	0	0	0	0	0	0	0	0	0.000	0.000	0.000	0.000	0.000	0.000
46	4	5	Buffer	n/a	8205	50348	400	10538	10488	787	11308	11539	891	0	0	0	0	0	0	0	0	0	0	0	0	0	0	0	0	0	0	0	0	0	0	0	0	0	0	0	0	0	0	0.000	0.000	0.000	0.000	0.000	0.000
46	5	5	Buffer	n/a	8803	50348	400	11822	12522	2925	10538	10766	981	62	29	0	0	0	0	0	0	0	0	0	0	0	0	0	0	0	0	0	0	0	0	0	0	0	0	0	0	0	0	0.000	0.000	0.000	0.000	0.000	0.000
46	6	5	Buffer	n/a	9400	50348	400	10280	10135	663	10280	10665	1238	0	0	0	0	0	0	0	0	0	0	0	0	0	0	0	0	0	0	0	0	0	0	0	0	0	0	0	0	0	0	0.000	0.000	0.000	0.000	0.000	0.000
47	1	1	Nonphosphopeptide6	empty	10097	47308	400	10538	10607	409	10794	10752	520	1	0	0	0	0	0	0	0	0	0	0	0	0	0	0	0	0	0	0	0	0	0	0	0	0	0	0	0	0	0	0.000	0.000	0.000	0.000	0.000	0.000
47	2	1	Nonphosphopeptide6	empty	10694	47308	400	10538	10778	928	11052	11016	915	15	0	0	0	0	0	0	0	0	0	0	0	0	0	0	0	0	0	0	0	0	0	0	0	0	0	0	0	0	0	0.000	0.000	0.000	0.000	0.000	0.000
47	3	1	empty	empty	11292	47308	400	10538	10920	1267	10538	10685	783	23	13	0	0	0	0	0	0	0	0	0	0	0	0	0	0	0	0	0	0	0	0	0	0	0	0	0	0	0	0	0.000	0.000	0.000	0.000	0.000	0.000
47	4	1	empty	empty	11889	47308	400	10794	10828	941	10538	10664	1069	17	6	0	0	0	0	0	0	0	0	0	0	0	0	0	0	0	0	0	0	0	0	0	0	0	0	0	0	0	0	0.000	0.000	0.000	0.000	0.000	0.000
47	5	1	empty	empty	12487	47308	400	10280	10423	592	10538	10467	655	13	0	0	0	0	0	0	0	0	0	0	0	0	0	0	0	0	0	0	0	0	0	0	0	0	0	0	0	0	0	0.000	0.000	0.000	0.000	0.000	0.000
47	6	1	empty	empty	13084	47308	400	10794	10883	819	10024	10155	610	60	37	0	0	0	0	0	0	0	0	0	0	0	0	0	0	0	0	0	0	0	0	0	0	0	0	0	0	0	0	0.000	0.000	0.000	0.000	0.000	0.000
47	1	2	zeta-chain (TCR) associated protein kinase 70kDa	P000024	10097	48062	400	11566	11423	594	10794	10958	1227	19	0	0	0	0	0	0	0	0	0	0	0	0	0	0	0	0	0	0	0	0	0	0	0	0	0	0	0	0	0	0.000	0.000	0.000	0.000	0.000	0.000
47	2	2	zeta-chain (TCR) associated protein kinase 70kDa	P000024	10694	48062	400	11566	11696	492	10794	10530	818	46	7	0	0	0	0	0	0	0	0	0	0	0	0	0	0	0	0	0	0	0	0	0	0	0	0	0	0	0	0	0.000	0.000	0.000	0.000	0.000	0.000
47	3	2	zeta-chain (TCR) associated protein kinase 70kDa	P000024	11292	48062	400	11308	11411	1075	11052	10751	889	23	13	0	0	0	0	0	0	0	0	0	0	0	0	0	0	0	0	0	0	0	0	0	0	0	0	0	0	0	0	0.000	0.000	0.000	0.000	0.000	0.000
47	4	2	zeta-chain (TCR) associated protein kinase 70kDa	P000024	11889	48062	400	14906	17464	7758	10794	11106	1210	76	60	0	0	0	0	0	0	0	0	0	0	0	0	0	0	0	0	0	0	0	0	0	0	0	0	0	0	0	0	0.000	0.000	0.000	0.000	0.000	0.000
47	5	2	DNA-damage-inducible transcript 3	P000106	12487	48062	400	15678	17268	4264	10280	10233	778	100	98	0	0	0	0	0	0	0	0	0	0	0	0	0	0	0	0	0	0	0	0	0	0	0	0	0	0	0	0	0.000	0.000	0.000	0.000	0.000	0.000
47	6	2	DNA-damage-inducible transcript 3	P000106	13084	48062	400	15420	15062	1588	10280	11384	2983	84	20	0	0	0	0	0	0	0	0	0	0	0	0	0	0	0	0	0	0	0	0	0	0	0	0	0	0	0	0	0.000	0.000	0.000	0.000	0.000	0.000
47	1	3	DNA-damage-inducible transcript 3	P000106	10097	48815	400	13364	13642	1350	10280	10409	851	99	91	0	0	0	0	0	0	0	0	0	0	0	0	0	0	0	0	0	0	0	0	0	0	0	0	0	0	0	0	0.000	0.000	0.000	0.000	0.000	0.000
47	2	3	DNA-damage-inducible transcript 3	P000106	10694	48815	400	14650	16077	5223	10280	10296	780	86	72	0	0	0	0	0	0	0	0	0	0	0	0	0	0	0	0	0	0	0	0	0	0	0	0	0	0	0	0	0.000	0.000	0.000	0.000	0.000	0.000
47	3	3	MAD; mothers against decapentaplegic homolog 5 (Drosophila)	P000310	11292	48815	400	11822	11762	1871	10794	10754	879	53	36	0	0	0	0	0	0	0	0	0	0	0	0	0	0	0	0	0	0	0	0	0	0	0	0	0	0	0	0	0.000	0.000	0.000	0.000	0.000	0.000
47	4	3	MAD; mothers against decapentaplegic homolog 5 (Drosophila)	P000310	11889	48815	400	10794	10864	675	10538	10777	1627	2	0	0	0	0	0	0	0	0	0	0	0	0	0	0	0	0	0	0	0	0	0	0	0	0	0	0	0	0	0	0.000	0.000	0.000	0.000	0.000	0.000
47	5	3	MAD; mothers against decapentaplegic homolog 5 (Drosophila)	P000310	12487	48815	400	11308	11500	1292	10280	10164	866	51	30	0	0	0	0	0	0	0	0	0	0	0	0	0	0	0	0	0	0	0	0	0	0	0	0	0	0	0	0	0.000	0.000	0.000	0.000	0.000	0.000
47	6	3	MAD; mothers against decapentaplegic homolog 5 (Drosophila)	P000310	13084	48815	400	11822	11743	574	10538	10889	1488	39	0	0	0	0	0	0	0	0	0	0	0	0	0	0	0	0	0	0	0	0	0	0	0	0	0	0	0	0	0	0.000	0.000	0.000	0.000	0.000	0.000
47	1	4	DnaJ (Hsp40) homolog; subfamily B; member 1	P000411	10097	49569	400	11566	11922	1550	10280	10400	636	75	54	0	0	0	0	0	0	0	0	0	0	0	0	0	0	0	0	0	0	0	0	0	0	0	0	0	0	0	0	0.000	0.000	0.000	0.000	0.000	0.000
47	2	4	DnaJ (Hsp40) homolog; subfamily B; member 1	P000411	10694	49569	400	10794	10776	644	10280	10287	566	42	13	0	0	0	0	0	0	0	0	0	0	0	0	0	0	0	0	0	0	0	0	0	0	0	0	0	0	0	0	0.000	0.000	0.000	0.000	0.000	0.000
47	3	4	DnaJ (Hsp40) homolog; subfamily B; member 1	P000411	11292	49569	400	11052	11312	1141	10280	10310	640	58	31	0	0	0	0	0	0	0	0	0	0	0	0	0	0	0	0	0	0	0	0	0	0	0	0	0	0	0	0	0.000	0.000	0.000	0.000	0.000	0.000
47	4	4	DnaJ (Hsp40) homolog; subfamily B; member 1	P000411	11889	49569	400	11308	11200	927	10794	11217	1941	7	0	0	0	0	0	0	0	0	0	0	0	0	0	0	0	0	0	0	0	0	0	0	0	0	0	0	0	0	0	0.000	0.000	0.000	0.000	0.000	0.000
47	5	4	interferon stimulated gene 20kDa	P000506	12487	49569	400	11566	11496	505	11308	11667	1763	1	0	0	0	0	0	0	0	0	0	0	0	0	0	0	0	0	0	0	0	0	0	0	0	0	0	0	0	0	0	0.000	0.000	0.000	0.000	0.000	0.000
47	6	4	interferon stimulated gene 20kDa	P000506	13084	49569	400	11566	11514	871	10794	11024	1202	30	1	0	0	0	0	0	0	0	0	0	0	0	0	0	0	0	0	0	0	0	0	0	0	0	0	0	0	0	0	0.000	0.000	0.000	0.000	0.000	0.000
47	1	5	interferon stimulated gene 20kDa	P000506	10097	50322	400	13364	13743	1475	10280	10349	692	100	95	0	0	0	0	0	0	0	0	0	0	0	0	0	0	0	0	0	0	0	0	0	0	0	0	0	0	0	0	0.000	0.000	0.000	0.000	0.000	0.000
47	2	5	interferon stimulated gene 20kDa	P000506	10694	50322	400	12594	12772	1188	10024	10009	718	97	90	0	0	0	0	0	0	0	0	0	0	0	0	0	0	0	0	0	0	0	0	0	0	0	0	0	0	0	0	0.000	0.000	0.000	0.000	0.000	0.000
47	3	5	serine/threonine kinase 24 (STE20 homolog; yeast)	P001032	11292	50322	400	17476	16963	2323	10538	10518	723	97	94	0	0	0	0	0	0	0	0	0	0	0	0	0	0	0	0	0	0	0	0	0	0	0	0	0	0	0	0	0.000	0.000	0.000	0.000	0.000	0.000
47	4	5	serine/threonine kinase 24 (STE20 homolog; yeast)	P001032	11889	50322	400	17476	18091	3379	10794	10809	1059	99	97	0	0	0	0	0	0	0	0	0	0	0	0	0	0	0	0	0	0	0	0	0	0	0	0	0	0	0	0	0.000	0.000	0.000	0.000	0.000	0.000
47	5	5	serine/threonine kinase 24 (STE20 homolog; yeast)	P001032	12487	50322	400	16192	16264	2688	10794	10966	999	95	86	0	0	0	0	0	0	0	0	0	0	0	0	0	0	0	0	0	0	0	0	0	0	0	0	0	0	0	0	0.000	0.000	0.000	0.000	0.000	0.000
47	6	5	serine/threonine kinase 24 (STE20 homolog; yeast)	P001032	13084	50322	400	16962	16509	2251	11052	11149	1155	94	88	0	0	0	0	0	0	0	0	0	0	0	0	0	0	0	0	0	0	0	0	0	0	0	0	0	0	0	0	0.000	0.000	0.000	0.000	0.000	0.000
48	1	1	Cy5/Cy3 labeled biotin-BSA marker proteins	n/a	13682	47309	400	10538	10704	1851	10280	12035	5814	1	0	0	0	0	0	0	0	0	0	0	0	0	0	0	0	0	0	0	0	0	0	0	0	0	0	0	0	0	0	0.000	0.000	0.000	0.000	0.000	0.000
48	2	1	Cy5/Cy3 labeled biotin-BSA marker proteins	n/a	14279	47309	400	10280	10412	718	10538	10593	690	14	2	0	0	0	0	0	0	0	0	0	0	0	0	0	0	0	0	0	0	0	0	0	0	0	0	0	0	0	0	0.000	0.000	0.000	0.000	0.000	0.000
48	3	1	empty	empty	14877	47309	400	10538	10664	728	10666	10906	886	17	0	0	0	0	0	0	0	0	0	0	0	0	0	0	0	0	0	0	0	0	0	0	0	0	0	0	0	0	0	0.000	0.000	0.000	0.000	0.000	0.000
48	4	1	empty	empty	15474	47309	400	10538	11001	1294	10794	10709	844	26	20	0	0	0	0	0	0	0	0	0	0	0	0	0	0	0	0	0	0	0	0	0	0	0	0	0	0	0	0	0.000	0.000	0.000	0.000	0.000	0.000
48	5	1	empty	empty	16072	47309	400	10794	10857	889	10280	10379	933	27	4	0	0	0	0	0	0	0	0	0	0	0	0	0	0	0	0	0	0	0	0	0	0	0	0	0	0	0	0	0.000	0.000	0.000	0.000	0.000	0.000
48	6	1	empty	empty	16669	47309	400	11052	11427	1896	11566	11904	2154	13	3	0	0	0	0	0	0	0	0	0	0	0	0	0	0	0	0	0	0	0	0	0	0	0	0	0	0	0	0	0.000	0.000	0.000	0.000	0.000	0.000
48	1	2	Buffer	n/a	13682	48063	400	11822	12014	1373	10538	12189	5546	0	0	0	0	0	0	0	0	0	0	0	0	0	0	0	0	0	0	0	0	0	0	0	0	0	0	0	0	0	0	0.000	0.000	0.000	0.000	0.000	0.000
48	2	2	Buffer	n/a	14279	48063	400	10280	10388	631	10024	10217	765	32	6	0	0	0	0	0	0	0	0	0	0	0	0	0	0	0	0	0	0	0	0	0	0	0	0	0	0	0	0	0.000	0.000	0.000	0.000	0.000	0.000
48	3	2	Buffer	n/a	14877	48063	400	10794	12003	3175	10794	11077	1163	26	18	0	0	0	0	0	0	0	0	0	0	0	0	0	0	0	0	0	0	0	0	0	0	0	0	0	0	0	0	0.000	0.000	0.000	0.000	0.000	0.000
48	4	2	Buffer	n/a	15474	48063	400	10024	10303	2306	11052	11397	1335	7	5	0	0	0	0	0	0	0	0	0	0	0	0	0	0	0	0	0	0	0	0	0	0	0	0	0	0	0	0	0.000	0.000	0.000	0.000	0.000	0.000
48	5	2	sapiens; casein kinase 1; gamma 1	P000085	16072	48063	400	11308	11295	780	10794	11980	3385	0	0	0	0	0	0	0	0	0	0	0	0	0	0	0	0	0	0	0	0	0	0	0	0	0	0	0	0	0	0	0.000	0.000	0.000	0.000	0.000	0.000
48	6	2	sapiens; casein kinase 1; gamma 1	P000085	16669	48063	400	12080	12833	3046	11052	11099	962	58	18	0	0	0	0	0	0	0	0	0	0	0	0	0	0	0	0	0	0	0	0	0	0	0	0	0	0	0	0	0.000	0.000	0.000	0.000	0.000	0.000
48	1	3	sapiens; casein kinase 1; gamma 1	P000085	13682	48816	400	11822	11628	680	10280	10255	860	74	42	0	0	0	0	0	0	0	0	0	0	0	0	0	0	0	0	0	0	0	0	0	0	0	0	0	0	0	0	0.000	0.000	0.000	0.000	0.000	0.000
48	2	3	sapiens; casein kinase 1; gamma 1	P000085	14279	48816	400	12080	12191	1540	10538	10695	1586	46	7	0	0	0	0	0	0	0	0	0	0	0	0	0	0	0	0	0	0	0	0	0	0	0	0	0	0	0	0	0.000	0.000	0.000	0.000	0.000	0.000
48	3	3	adenosylmethionine decarboxylase 1	P000291	14877	48816	400	11052	14071	6522	10538	10481	993	44	36	0	0	0	0	0	0	0	0	0	0	0	0	0	0	0	0	0	0	0	0	0	0	0	0	0	0	0	0	0.000	0.000	0.000	0.000	0.000	0.000
48	4	3	adenosylmethionine decarboxylase 1	P000291	15474	48816	400	11308	11614	1186	10538	10763	694	59	36	0	0	0	0	0	0	0	0	0	0	0	0	0	0	0	0	0	0	0	0	0	0	0	0	0	0	0	0	0.000	0.000	0.000	0.000	0.000	0.000
48	5	3	adenosylmethionine decarboxylase 1	P000291	16072	48816	400	11052	11267	1103	10538	11745	3742	0	0	0	0	0	0	0	0	0	0	0	0	0	0	0	0	0	0	0	0	0	0	0	0	0	0	0	0	0	0	0.000	0.000	0.000	0.000	0.000	0.000
48	6	3	adenosylmethionine decarboxylase 1	P000291	16669	48816	400	11566	11997	1951	10794	10795	849	47	36	0	0	0	0	0	0	0	0	0	0	0	0	0	0	0	0	0	0	0	0	0	0	0	0	0	0	0	0	0.000	0.000	0.000	0.000	0.000	0.000
48	1	4	folate hydrolase (prostate-specific membrane antigen) 1	P000375	13682	49570	400	11566	11506	731	9766	10000	746	93	68	0	0	0	0	0	0	0	0	0	0	0	0	0	0	0	0	0	0	0	0	0	0	0	0	0	0	0	0	0.000	0.000	0.000	0.000	0.000	0.000
48	2	4	folate hydrolase (prostate-specific membrane antigen) 1	P000375	14279	49570	400	10794	11327	1593	10280	11037	2233	15	4	0	0	0	0	0	0	0	0	0	0	0	0	0	0	0	0	0	0	0	0	0	0	0	0	0	0	0	0	0.000	0.000	0.000	0.000	0.000	0.000
48	3	4	folate hydrolase (prostate-specific membrane antigen) 1	P000375	14877	49570	400	10794	11054	916	10794	11324	1645	5	2	0	0	0	0	0	0	0	0	0	0	0	0	0	0	0	0	0	0	0	0	0	0	0	0	0	0	0	0	0.000	0.000	0.000	0.000	0.000	0.000
48	4	4	folate hydrolase (prostate-specific membrane antigen) 1	P000375	15474	49570	400	12080	12171	1407	10794	11117	1002	65	30	0	0	0	0	0	0	0	0	0	0	0	0	0	0	0	0	0	0	0	0	0	0	0	0	0	0	0	0	0.000	0.000	0.000	0.000	0.000	0.000
48	5	4	nudix (nucleoside diphosphate linked moiety X)-type motif 2	P000481	16072	49570	400	12336	14410	5387	10538	10380	698	63	53	0	0	0	0	0	0	0	0	0	0	0	0	0	0	0	0	0	0	0	0	0	0	0	0	0	0	0	0	0.000	0.000	0.000	0.000	0.000	0.000
48	6	4	nudix (nucleoside diphosphate linked moiety X)-type motif 2	P000481	16669	49570	400	11052	11015	1288	10538	10550	733	49	17	0	0	0	0	0	0	0	0	0	0	0	0	0	0	0	0	0	0	0	0	0	0	0	0	0	0	0	0	0.000	0.000	0.000	0.000	0.000	0.000
48	1	5	nudix (nucleoside diphosphate linked moiety X)-type motif 2	P000481	13682	50323	400	11052	11256	825	10024	10355	747	74	41	0	0	0	0	0	0	0	0	0	0	0	0	0	0	0	0	0	0	0	0	0	0	0	0	0	0	0	0	0.000	0.000	0.000	0.000	0.000	0.000
48	2	5	nudix (nucleoside diphosphate linked moiety X)-type motif 2	P000481	14279	50323	400	11052	10859	853	10538	10775	977	28	0	0	0	0	0	0	0	0	0	0	0	0	0	0	0	0	0	0	0	0	0	0	0	0	0	0	0	0	0	0.000	0.000	0.000	0.000	0.000	0.000
48	3	5	TRAF and TNF receptor associated protein	P000610	14877	50323	400	11822	11926	1431	10538	10383	718	72	49	0	0	0	0	0	0	0	0	0	0	0	0	0	0	0	0	0	0	0	0	0	0	0	0	0	0	0	0	0.000	0.000	0.000	0.000	0.000	0.000
48	4	5	TRAF and TNF receptor associated protein	P000610	15474	50323	400	12336	12813	2331	10538	10714	1128	68	41	0	0	0	0	0	0	0	0	0	0	0	0	0	0	0	0	0	0	0	0	0	0	0	0	0	0	0	0	0.000	0.000	0.000	0.000	0.000	0.000
48	5	5	TRAF and TNF receptor associated protein	P000610	16072	50323	400	12080	12125	1354	10794	11469	2742	17	0	0	0	0	0	0	0	0	0	0	0	0	0	0	0	0	0	0	0	0	0	0	0	0	0	0	0	0	0	0.000	0.000	0.000	0.000	0.000	0.000
48	6	5	TRAF and TNF receptor associated protein	P000610	16669	50323	400	12336	12188	919	11052	11367	2119	9	0	0	0	0	0	0	0	0	0	0	0	0	0	0	0	0	0	0	0	0	0	0	0	0	0	0	0	0	0	0.000	0.000	0.000	0.000	0.000	0.000
[truncated: 32 more columns]
